1 **A dominant-negative avirulence effector of the barley powdery mildew fungus**  
2 **provides mechanistic insight to barley MLA immune receptor activation**

3 Emma E Crean<sup>§,1</sup>, Merle Bilstein-Schloemer<sup>§,1</sup>, Takaki Maekawa<sup>1,2,3</sup>, Paul Schulze-Lefert<sup>2,3</sup>, Isabel ML  
4 Saur<sup>1,3</sup>

5

6 <sup>§</sup> equal contribution

7 <sup>1</sup> Institute for Plant Sciences University of Cologne, Cologne, D-50674, Germany

8 <sup>2</sup> Department for Plant Microbe Interactions, Max-Planck Institute for Plant Breeding Research,  
9 50829 Cologne, Germany

10 <sup>3</sup> Cluster of Excellence on Plant Sciences (CEPLAS)

11

12 Author for correspondence: [isabel.saur@uni-koeln.de](mailto:isabel.saur@uni-koeln.de)

13

14

15

16

17

18

19

20 **Abstract**

21 Nucleotide-binding leucine-rich repeat receptors (NLRs) recognize pathogen effectors to mediate plant  
22 disease resistance, which is often accompanied by a localized host cell death response. Effectors can  
23 escape NLR recognition through various polymorphisms, allowing the pathogen to proliferate on  
24 previously resistant host plants. The powdery mildew effector AVR<sub>A13</sub>-1 is recognized by the barley NLR  
25 MLA13 and activates host cell death. We demonstrate here that a virulent form of AVR<sub>A13</sub>, called  
26 AVR<sub>A13</sub>-V2, escapes MLA13 recognition by substituting a serine for a leucine residue at the C-terminus.  
27 Counterintuitively, this substitution in AVR<sub>A13</sub>-V2 resulted in an enhanced MLA13 association and  
28 prevented the detection of AVR<sub>A13</sub>-1 by MLA13. Therefore, AVR<sub>A13</sub>-V2 is a dominant-negative form of  
29 AVR<sub>A13</sub> and has likely contributed to the breakdown of *Mla13* resistance. Despite this dominant-  
30 negative activity, AVR<sub>A13</sub>-V2 failed to suppress host cell death mediated by the MLA13 auto-active  
31 “MHD” variant. Neither AVR<sub>A13</sub>-1 nor AVR<sub>A13</sub>-V2 interacted with the MLA13 auto-active variant,  
32 implying that the binding moiety in MLA13 that mediates association with AVR<sub>A13</sub>-1 is altered after  
33 receptor activation. We also show that mutations in the MLA13 coiled-coil signalling domain, which  
34 were thought to impair Ca<sup>2+</sup>-channel activity and NLR function, instead resulted in MLA13 auto-active  
35 cell death. The data constitute an important step to define intermediate receptor conformations  
36 during NLR activation.

37

38 **Key words**

39 Mildew locus A, MLA, *Blumeria graminis*, fungal effector, NLR, resistance, powdery mildew, barley, cell  
40 death

41 **Short title:**

42 A fungal avirulence effector dominantly inhibits the barley MLA immune receptor

## 43 Introduction

44 During infection of their host, pathogens secrete numerous molecules that act either extracellularly or  
45 inside host cells. Some of these molecules act as virulence factors (so-called effectors) to manipulate  
46 the host's physiology in favour of the pathogen. Disease resistance of a plant against a pathogen is  
47 often mediated by resistance genes encoding nucleotide-binding leucine-rich repeat receptors (NLRs)  
48 (Maekawa *et al.*, 2011b; Jones *et al.*, 2016). NLRs recognize effectors by direct binding or by indirectly  
49 detecting effector-mediated alterations of host targets (guardees) or their mimics (decoys) (Cesari,  
50 2018). Effector-mediated NLR activation is often linked to localized host cell death (Dodds and Rathjen,  
51 2010; Saur and Hückelhoven, 2021; Maekawa *et al.*, 2022) and recognized effectors are called  
52 avirulence (AVR) effectors. Diversification of genes encoding AVRs can lead to loss of recognition by  
53 the respective NLR, resulting in pathogen virulence and breakdown of disease resistance (Märkle *et*  
54 *al.*, 2022). In case of direct AVR recognition, the NLR can usually no longer bind the diversified effector  
55 proteins of virulent pathogen isolates (Saur *et al.*, 2021).

56 NLRs are modular multidomain proteins with a central NB (nucleotide-binding) domain and C-terminal  
57 leucine-rich repeats (LRRs). At the N-terminus, most NLRs encode either a Toll/Interleukin-1 receptor-  
58 like (TIR) or a coiled-coil (CC) domain, classifying the majority of NLRs into either TIR-type NLRs (TNLs)  
59 or CC-type NLRs (CNLs) (Shao *et al.*, 2016). A subgroup of CNLs (also called RPW8-like NLRs or RNLs)  
60 are the helper NLRs NRG1 (N REQUIREMENT GENE 1) and ADR1 (ACTIVATED DISEASE RESISTANCE  
61 GENE 1) that are genetically required for TNL-mediated disease resistance (Saile *et al.*, 2020). The N-  
62 terminal CC and TIR domains mediate NLR signal emission upon NLR activation (Swiderski *et al.*, 2009;  
63 Bernoux *et al.*, 2011; Collier *et al.*, 2011; Maekawa *et al.*, 2011a; Williams *et al.*, 2014). In the absence  
64 of matching pathogen effectors, CC and TIR domains are locked in inactive conformations and this  
65 auto-inhibition is mediated by inter-domain interactions between the N-terminal domains with the NB  
66 and LRR domains (Burdett *et al.*, 2019; Saur *et al.*, 2021; Tamborski *et al.*, 2022). Although structural  
67 information on intermediate forms between inactive and active signalling NLRs is limited to the  
68 structure of the *Arabidopsis thaliana* CNL ZAR1 (HOPZ-ACTIVATED RESISTANCE 1) (Wang *et al.*, 2019b),

69 NLR activation is thought to be a multistep process (Förderer *et al.*, 2022b). The first activation step is  
70 ligand binding, which induces a steric clash between the LRR and the NB domain. The resulting open  
71 conformation of the NB domain then allows exchange of ADP (inactive) to ATP (active), which in turn  
72 induces allosteric changes to release the conformational auto-inhibition of the CC or TIR domains. This  
73 induces NLR oligomerization and these NLR oligomers are referred to as resistosomes (Förderer *et al.*,  
74 2022b). Certain amino acid replacements within the conserved MHD motif of the NB domain mimic  
75 ATP binding and thus result in an active NLR conformation (Dinesh-Kumar and Baker, 2000;  
76 Bendahmane *et al.*, 2002; Paulmurugan *et al.*, 2002; Howles *et al.*, 2005; Gao *et al.*, 2011; Bai *et al.*,  
77 2012; Ntoukakis *et al.*, 2013, 2014; Roberts *et al.*, 2013; Nishimura *et al.*, 2017). The N-terminal portion  
78 of the LRR domain in CNLs also contributes to receptor auto-regulation through interactions with CC  
79 and NB domains and amino acid exchanges at these sites can affect NLR auto-activity (Rairdan and  
80 Moffett, 2006; Slootweg *et al.*, 2013; Burdett *et al.*, 2019; Förderer *et al.*, 2022a; Tamborski *et al.*,  
81 2022). For receptor activation *via* direct effector recognition, amino acids in the LRR can have  
82 additional functions as effector contact sites and can define the specificity of effector recognition (Jia  
83 *et al.*, 2000; Shen *et al.*, 2003; Dodds *et al.*, 2006; Bauer *et al.*, 2021; Tamborski *et al.*, 2022; Förderer  
84 *et al.*, 2022b). Upon direct effector recognition by the LRR or other integrated domains, effector  
85 binding correlates directly with NLR signal activation and studies on the *Magnaporthe oryzae* effectors  
86 AvrPik and AVR-Pia and the rice NLRs Pik and RGA5, respectively, argue for an affinity threshold  
87 between receptor and effector for activation of NLR immune signalling and pathogen resistance (Ortiz  
88 *et al.*, 2017; de la Concepcion *et al.*, 2018).

89 While the mechanisms underlying the restriction of pathogen growth by resistosomes is not fully  
90 elucidated, recent cryo-EM structures of multiple resistosomes (Wang *et al.*, 2019a,b; Ma *et al.*, 2020;  
91 Martin *et al.*, 2020; Förderer *et al.*, 2022a) revealed fundamental differences in immune signalling  
92 initiated by TNLs and CNLs: the pentameric resistosomes of *A. thaliana* ZAR1 CNL and wheat Sr35 CNL  
93 have calcium ion-permeable non-selective cation channel activity (Bi *et al.*, 2021; Förderer *et al.*,  
94 2022a). The funnel-shaped ZAR1 cation channel is formed by the N-terminal CC domain  $\alpha$ 1-helix of the

95 ZAR1 resistosome (Wang *et al.*, 2019a,b). Substitutions of negatively charged amino acids to alanine in  
96 the inner lining of the funnel abolishes Ca<sup>2+</sup> channel and cell death activity and ZAR1-mediated  
97 resistance (Wang *et al.*, 2019b; Bi *et al.*, 2021). The  $\alpha$ 1-helix region of the wheat Sr35 resistosome is  
98 not well resolved in the cryo-EM structure and Sr35  $\alpha$ 1-helix amino acid exchanges equivalent to those  
99 in ZAR1 do not affect AvrSr35-dependent Sr35 resistosome channel and cell death activity (Förderer  
100 *et al.*, 2022a; Zhao *et al.*, 2022), suggesting differences in Ca<sup>2+</sup> signalling functions between ZAR1 and  
101 Sr35 resistosomes. Effector binding to the TNLs RPP1 (RECOGNITION OF PERONOSPORA PARASITICA  
102 1) and ROQ1 (RECOGNITION OF XopQ 1) from *A. thaliana* and *Nicotiana benthamiana*, respectively,  
103 induces the formation of homotetrameric complexes stimulating TIR enzyme activity. The resistosome  
104 TIR enzyme, but also TIR-only proteins, produce a variety of nucleotide-based second messenger  
105 molecules (Horsefield *et al.*, 2019; Wan *et al.*, 2019; Yu *et al.*, 2022; Huang *et al.*, 2022; Jia *et al.*, 2022),  
106 some of which serve as ligands to activate the EDS1 protein family plus the signalling/helper CNLs ADR1  
107 or NRG1 (Lapin *et al.*, 2019; Huang *et al.*, 2022; Jia *et al.*, 2022). ADR1 and NRG1 can also function as  
108 calcium ion-permeable nonselective cation channels (Jacob *et al.*, 2021), and as such disruption of Ca<sup>2+</sup>  
109 homeostasis appears to be central in CNL and TNL resistosome signalling.

110 The polymorphic barley *Mildew locus A (Mla)* encodes allelic variants of CNLs (MLA NLRs), each  
111 conferring isolate-specific disease resistance to the barley powdery mildew fungus *Blumeria graminis*  
112 f. sp. *hordei (Bgh)* (Moseman and Schaller, 1960; Glawe, 2008; Seeholzer *et al.*, 2010; Maekawa *et al.*,  
113 2019). Some barley MLA receptors and *Mla* homologs confer additional resistance to isolates of  
114 unrelated fungal pathogens (Periyannan *et al.*, 2013; Mago *et al.*, 2015; Chen *et al.*, 2017;  
115 Bettgenhaeuser *et al.*, 2021; Ortiz *et al.*, 2022; Brabham *et al.*, 2022). The *Bgh* effectors recognized by  
116 barley MLAs are known as AVR<sub>A</sub> effectors (Moseman and Schaller, 1960; Jorgensen, 1994) and  
117 diversified variants that have escaped *Mla* recognition are designated as AVR<sub>A</sub>-V variants (Lu *et al.*,  
118 2016). To date, full length structures of inactive or effector-activated MLAs are not available, but  
119 protein interaction assays suggest a direct interaction between at least some MLA NLRs and matching  
120 AVR<sub>A</sub> effectors (Saur *et al.*, 2019a). Most amino acids under positive selection of *Mla* resistance

121 specificities map to the predicted solvent-exposed sites of the LRR, suggesting that these serve as AVR<sub>A</sub>  
122 contact residues (Seeholzer *et al.*, 2010; Maekawa *et al.*, 2019), but interaction between effectors and  
123 MLA LRR domain deletion constructs could not be shown. Most of the known *Bgh* AVR<sub>A</sub> effectors are  
124 sequence-unrelated, but share a common fold reminiscent of ribonucleases lacking catalytic residues  
125 (Bauer *et al.*, 2021).

126 *Mla13* in barley confers resistance to most *Bgh* isolates representing a global pathogen population  
127 because these avirulent isolates express recognised AVR<sub>A13</sub>-1/BLGH\_02099 (Lu *et al.*, 2016; Saur *et al.*,  
128 2019a). AVR<sub>A13</sub>-1 is directly recognized by MLA13 and effector recognition drives MLA13-mediated cell  
129 death upon transient co-expression of *Mla13* and AVR<sub>A13</sub>-1 in barley protoplasts and heterologous  
130 *N. benthamiana* leaves. AVR<sub>A13</sub>-1/BLGH\_02099 is polymorphic in the *Mla13*-virulent *Bgh* isolates CC52  
131 and B103 and the resulting gene products are named AVR<sub>A13</sub>-V1 and AVR<sub>A13</sub>-V2, respectively (Lu *et al.*,  
132 2016). AVR<sub>A13</sub>-V1 represents a truncated version of AVR<sub>A13</sub>-1, and after transient gene overexpression  
133 *in planta*, the AVR<sub>A13</sub>-V1 protein is unstable and often not detectable. Currently, it cannot be ruled out  
134 that the lack of AVR<sub>A13</sub>-V1 recognition by MLA13 is solely due to AVR<sub>A13</sub>-V1 protein instability (Saur *et*  
135 *al.*, 2019a). AVR<sub>A13</sub>-V2 carries five C-terminal amino acids (VRATL) that correspond to eight unrelated  
136 amino acids in AVR<sub>A13</sub>-1 (TCMVSSPE). Not in agreement with the virulent pathotype of *Bgh* isolate B103  
137 on *Mla13* barley, interaction assays *in planta* and in yeast indicated a stable association between  
138 AVR<sub>A13</sub>-V2 and MLA13 (Saur *et al.*, 2019a).

139 Because receptor-effector interaction is commonly linked to receptor activation, we aimed here to  
140 investigate the seeming paradox of MLA13 inactivity despite stable AVR<sub>A13</sub>-V2 - MLA13 association By  
141 applying proximity-dependent protein labelling (BioID), yeast-2-hybrid (Y2H) interaction assays and  
142 structural prediction (AlphaFold2) in combination with *in planta* expression of naturally occurring  
143 AVR<sub>A13</sub> effector variants and by generating deletion and hybrid constructs, we demonstrate that a  
144 single surface-exposed amino acid at the C-terminus of AVR<sub>A13</sub> effectors determines the association  
145 with and activation of MLA13. Our data also reveal that AVR<sub>A13</sub>-V2 acts as dominant-negative effector  
146 on MLA13-mediated cell death. This proposes that breakdown of *Mla13*-mediated resistance can be

147 explained by *Bgh* isolates carrying dominant-negative AVR<sub>A13</sub>-V2. We also demonstrate that amino acid  
148 exchanges in the MLA13 NB and LRR domains compromise effector binding. In turn, amino acid  
149 changes in the MLA13 CC domain predicted to disrupt cation channel activity, do not affect MLA13-  
150 mediated cell death. Nevertheless, inhibition of Ca<sup>2+</sup> and other cation channels by LaCl<sub>3</sub> impaired  
151 MLA13-mediated cell death of barley protoplasts. Collectively, these results provide insights and tools  
152 for understanding the conformational changes NLRs undergo during effector-mediated NLR  
153 resistosome activation.

154

## 155 **Results**

### 156 ***The C-terminus of AVR<sub>A13</sub> effectors determines interaction with and activation of MLA13***

157 The C-terminally located polymorphisms between genes encoding avirulent AVR<sub>A13</sub>-1 effector  
158 (activates MLA13-specified cell death) and virulent AVR<sub>A13</sub>-V1 or AVR<sub>A13</sub>-V2 variants (unable to activate  
159 MLA13 cell death; Fig. 1A) indicate a role of the AVR<sub>A13</sub>-1 C-terminus in the interaction with and  
160 activation of MLA13. Previously, no avirulence activity could be detected for AVR<sub>A13</sub>-V1, but this could  
161 be attributed to its protein instability upon transient expression *in planta* (Lu *et al.*, 2016; Saur *et al.*,  
162 2019a). Here we aimed to stabilize AVR<sub>A13</sub>-V1 protein by fusion with an epitope to retest the  
163 association patterns of the AVR<sub>A13</sub> variants with MLA13 *in planta*. To this end, we fused the three  
164 effector variants to a biotin ligase (BirA), and indeed this fusion allowed immunodetection of the  
165 AVR<sub>A13</sub>-V1 protein at levels comparable to the other two variants in *N. benthamiana* leaves (Fig. S1).  
166 We also confirmed the functionality of the tagged proteins by demonstrating MLA13-specified cell  
167 death induced by AVR<sub>A13</sub>-1-BirA-4xMyc (Fig. S1). We detected biotinylated MLA13, but not MLA1 or  
168 MLA7 protein, in samples expressing *Mla13-4Myc* together with AVR<sub>A13</sub>-1-BirA or AVR<sub>A13</sub>-V2-BirA, but  
169 not AVR<sub>A13</sub>-V1-BirA after biotin treatment followed by a streptavidin pull-down (Fig. S1B). Given that  
170 AVR<sub>A13</sub>-V1 lacks the 42 C-terminal amino acids of AVR<sub>A13</sub>-1 (Fig. 1A), the data provides experimental

171 evidence that the C-terminal half of AVR<sub>A13</sub> is needed for the association and activation of MLA13  
172 receptor.

173

174 Both, AVR<sub>A13</sub>-1 and AVR<sub>A13</sub>-V2 associate with MLA13, but only AVR<sub>A13</sub>-1 activates MLA13-mediated cell  
175 death (Saur *et al.*, 2019a) (Fig. S1). To delineate the AVR<sub>A13</sub>-1 amino acids required for MLA13 cell death  
176 activation, we generated a truncated AVR<sub>A13</sub>-1 construct (AVR<sub>A13</sub>-1<sup>ΔSPE</sup>) and four hybrid variants of  
177 AVR<sub>A13</sub>-1 and AVR<sub>A13</sub>-V2, which differ from AVR<sub>A13</sub>-1<sup>ΔSPE</sup> by one, two, three and four C-terminal amino  
178 acids, respectively (Fig. 1A). We then measured the ability of AVR<sub>A13</sub>-1<sup>ΔSPE</sup> and the hybrid variants to  
179 induce MLA13-mediated cell death upon transient expression in *N. benthamiana* leaves (Fig. 1B and  
180 1C). AVR<sub>A13</sub>-1<sup>ΔSPE</sup> was the only engineered construct that induced MLA13-specified cell death  
181 comparable to AVR<sub>A13</sub>-1 in these assays (Fig. 1B). Therefore, the three C-terminal amino acids are  
182 dispensable for the avirulence activity of AVR<sub>A13</sub>-1. The data demonstrates that the replacement of  
183 serine to leucine at position 119 abrogated MLA13-mediated cell death in *N. benthamiana*, suggesting  
184 that this serine in AVR<sub>A13</sub>-1 and AVR<sub>A13</sub>-1<sup>ΔSPE</sup> is crucial for cell death activation (Fig. 1B).

185 MLA13 interacts more efficiently with AVR<sub>A13</sub>-V2 than with AVR<sub>A13</sub>-1, and this enhanced association  
186 correlates with the inability to induce MLA13-mediated cell death (Saur *et al.*, 2019a). We therefore  
187 tested the association of AVR<sub>A13</sub>-1<sup>ΔSPE</sup> and the AVR<sub>A13</sub>-1/ AVR<sub>A13</sub>-V2 hybrid variants with MLA13. Protein  
188 stability of AVR<sub>A13</sub> hybrid variants varies *in planta*, which makes the assessment of quantitative  
189 differences of the interactions difficult (Fig. 1C). We then used a Y2H assay drop out series to evaluate  
190 putative quantitative differences, as in this system the corresponding prey and bait variants  
191 accumulated to comparable levels. We fused *Mla* N-terminally to the *LexA* binding domain sequence  
192 (*BD-Mla13*) and the *AVR<sub>A13</sub>* variant genes to the *B42* activation domain (*AD-AVR<sub>A13</sub>*) and determined  
193 yeast growth in the absence of leucine as a proxy for protein interaction. We found that yeasts co-  
194 expressing *BD-Mla13* with the *AD-AVR<sub>A13</sub>-1* and *AD-AVR<sub>A13</sub>-1<sup>ΔSPE</sup>* grew less in the dilution series than  
195 yeasts carrying *AD-AVR<sub>A13</sub>-V2* or any of the *AD-AVR<sub>A13</sub>* hybrid constructs (Fig. 1D). No growth was  
196 detected when *BD-Mla13* was co-expressed with *AD-AVR<sub>A13</sub>-V1* or when any *AVR<sub>A13</sub>* variant was co-



197 expressed with *BD-Mla1* (Fig. 1D and Fig. S2). The data imply that L<sup>119</sup> of AVR<sub>A13</sub>-V2 (Fig. 1A) is  
198 responsible for the enhanced interaction with MLA13. The corresponding residue in AVR<sub>A13</sub>-1 is a  
199 serine. We generated structural predictions of the AVR<sub>A13</sub> variants (lacking the respective signal  
200 peptides (SP)) using AlphaFold2 (pLDDT<sub>overall</sub> = 89, pLDDT<sub>L/S119</sub> = >80) to determine if either of these  
201 residues are surface exposed. Indeed both, L<sup>119</sup> of AVR<sub>A13</sub>-V2 ΔSP and S<sup>119</sup> of AVR<sub>A13</sub>-1 ΔSP appear to be  
202 surface exposed in these structural models, suggesting that they are accessible for binding to MLA13  
203 (Fig. 1F).

204

### 205 ***AVR<sub>A13</sub>-V2 can act as dominant-negative effector on MLA13-mediated cell death***

206 The observed enhanced association between MLA13 and AVR<sub>A13</sub>-V2 could affect *Mla13* disease  
207 resistance and possibly the activity of other MLA NLRs with resistance specificity to *Bgh*. To test this,  
208 we measured AVR<sub>A</sub>-induced MLA-mediated cell death in the presence of AVR<sub>A13</sub>-V2. Co-expression of  
209 *Mla13-4xMyc* together with *AVR<sub>a13</sub>-1-mYFP* (monomeric YFP) and an *empty vector (EV)* in  
210 *N. benthamiana* leaves resulted in a cell death response within 50 to 72 hours post infiltration and this  
211 response was not detectable when EV was exchanged for *AVR<sub>a13</sub>-V2-mYFP* (Fig. 2A). We also tested  
212 whether *AVR<sub>a13</sub>-V2-4xMyc* affects cell death mediated by *Mla1-3xHA* and *AVR<sub>a1</sub>-mYFP* or *Mla7-3xHA*  
213 and *AVR<sub>a7</sub>-2-mYFP* after transient expression of the constructs in *N. benthamiana*. We assessed the  
214 severity of cell death on a scale from 0 to 3 and found that AVR<sub>A13</sub>-1 and MLA13-mediated cell death  
215 was abrogated by the co-expression of AVR<sub>A13</sub>-V2. By contrast, cell death in samples expressing AVR<sub>a13</sub>-  
216 V2 alongside *Mla1* and AVR<sub>a1</sub> or *Mla7* and AVR<sub>a7</sub>-2 were comparable to those in which AVR<sub>a13</sub>-V2 was  
217 replaced by EV or AVR<sub>a13</sub>-V1 (Fig. 2B). The specific inhibitory effect of AVR<sub>a13</sub>-V2 on the MLA13 receptor  
218 (Fig. 2B) is not due to interference with MLA13 or AVR<sub>A13</sub>-1 protein stability, as both proteins were  
219 detectable at similar levels in samples with EV or unstable AVR<sub>A13</sub>-V1 as in samples co-expressing  
220 AVR<sub>a13</sub>-V2 (Fig. 2C). Our data suggest that AVR<sub>A13</sub>-V2 has a dominant-negative effect on cell death  
221 activity specifically mediated by MLA13.

222 ***Amino acid exchanges in the nucleotide-binding site of MLA13 compromise AVR<sub>A13</sub> effector***

223 ***binding***

224 Previous reports on flax TNL L6 suggest an equilibrium between inactive and active NLR conformations  
225 in the absence of pathogen effectors, but that binding of the matching effector stabilizes the active  
226 NLR conformation (Bernoux *et al.*, 2016). We therefore hypothesized that avirulent AVR<sub>A13</sub>-1 stabilizes  
227 the active ATP-bound oligomeric conformation of MLA13. Given that AVR<sub>A13</sub>-V2 can inhibit MLA13-  
228 mediated cell death in the co-expression assays (Fig. 2), we hypothesized that AVR<sub>A13</sub>-V2 binds and  
229 stabilizes the inactive MLA13 receptor. To test this hypothesis, we applied the aforementioned Y2H  
230 approach to examine the interaction between naturally occurring AVR<sub>A13</sub> variants and MLA13 variants  
231 carrying mutations in the NB domain that render the receptor inactive (P-loop mutants that cannot  
232 bind ADP or ATP at the NB domain) or auto-active (MHD mutant mimicking ATP binding at the NB  
233 domain). We first confirmed that the MLA13 P-loop mutant (MLA13<sup>K207R</sup>) is unable to induce cell death  
234 upon co-expression with AVR<sub>A13</sub>-1 (Fig. S3A) and that MLA13<sup>D502V</sup> (MHD mutant) induces cell death in  
235 the absence of the matching effector (Fig. S3B), before testing their ability to bind AVR<sub>A13</sub> variants in  
236 yeast. In the Y2H assay, yeast expressing BD-MLA13 together with AD-AVR<sub>A13</sub>-1 or AD- AVR<sub>A13</sub>-V2, but  
237 not AD-AVR<sub>A13</sub>-V1 fusion protein, grew as expected. Interestingly, none of the yeast samples co-  
238 expressing BD-MLA13<sup>D502V</sup> or BD-MLA13<sup>K207R</sup> together with any AVR<sub>A13</sub> variants grew in the absence of  
239 leucine although all proteins were stably detectable by western blot (Fig. 3A and 3B). We observed  
240 similar results for the *Mla* homolog *Sr50*, although we detected growth of yeast expressing AD-AvrSr50  
241 with the MHD variant Sr50<sup>D498V</sup> fused N-terminally to the B42 BD (Fig. S3). However, the latter  
242 interaction was consistently weaker when compared to samples co-transformed with BD-Sr50 wild-  
243 type (WT) and AD-AvrSr50. When AD-AvrSr50 was replaced by AD-AvrSr50<sub>QCMJC</sub>, a variant lacking  
244 avirulence activity, no interaction was detected, which was not due to differences in protein levels  
245 between the tested effector variants (Fig. S3C and S3D).

246 AVR<sub>A13</sub>-V2 binds specifically and strongly to wild-type MLA13 and can inhibit MLA13-specified cell  
247 death signalling, suggesting a direct link between effector binding and cell death inhibition for this

248 association. However, AVR<sub>A13</sub>-V2 cannot bind auto-active MLA13<sup>D502V</sup> in the Y2H assay (Fig. 3A) and we  
249 therefore speculate that it cannot inhibit MLA13<sup>D502V</sup>-mediated cell death. Indeed, co-overexpression  
250 of AVR<sub>a13</sub>-V2 or AVR<sub>A13</sub>-V1 had no effect on the average cell death score of MLA13<sup>D502V</sup>-induced cell  
251 death observed as early as two days post Agroinfiltration (dpi) of the respective constructs in *N.*  
252 *benthamiana* leaves (Fig. 3C). Four to five days after infiltration of *N. benthamiana* leaves with  
253 Agrobacteria carrying 35S:*Mla13* at OD<sub>600</sub>=1, we also detected effector-independent cell death  
254 mediated by wild-type MLA13 (MLA13 auto-activity). This average cell death score of 2 was  
255 significantly impaired in samples co-overexpressing AVR<sub>a13</sub>-V2 (average cell death score = 0.5) but not  
256 AVR<sub>a13</sub>-V1 (average cell death score = 1.9). Compared with EV or unstable AVR<sub>a13</sub>-V1, co-expression of  
257 AVR<sub>a13</sub>-V2 had no effect on the protein levels of any of the MLA13 variants used (Fig. 3D). Of note, cell  
258 death mediated by overexpression of the MLA13 CC domain (MLA13<sup>CC</sup>, amino acid (aa) 1-160) was not  
259 affected by AVR<sub>A13</sub>-V2 (Fig. S3E and S3F).

### 260 ***Different affinities between MLA13 mutant variants and AVR<sub>A13</sub> effectors***

261 The lack of AVR<sub>A13</sub> interaction with both inactive and active CNL MLA13 mutant variants was  
262 unexpected, as it contrasts with previous reports on flax TNL L6 and its matching effector AvrL567  
263 (Bernoux *et al.*, 2016). We therefore investigated whether this lack of effector-receptor association  
264 could be generalized to other putatively inactive or auto-active MLA13 variants (Fig. 4A). In addition to  
265 the MLA13<sup>D502V</sup> and MLA13<sup>K207A</sup> variants (Fig. 3), we chose the MHD mutant variant H501G, whose  
266 auto-activity in MLA10 appears to be less pronounced than that of D502V (Bai *et al.*, 2012). Receptor  
267 auto-activity was also previously reported for the F99E (mutation in the CC domain) variant of MLA10  
268 (Bai *et al.*, 2012). We also included the D284A mutant (mutation in the walker A motif of the NB site,  
269 Fig. 4A) because the corresponding variant in the *A. thaliana* CNL RPM1 (RESISTANCE TO *P. SYRINGAE*  
270 PV MACULICOLA 1) leads to RPM1 auto-activity (Gao *et al.*, 2011). By substituting negatively charged  
271 residues in the first  $\alpha$ -helix of MLA13 to alanine (MLA13<sup>D2A\_E17A</sup>), we aimed to generate an MLA13  
272 resistosome that is structurally intact but impaired in immune signalling via Ca<sup>2+</sup> influx (Wang *et al.*,  
273 2019*a,b*; Bi *et al.*, 2021). This hypothesis is based on the observation that the replacement of negatively

274 charged amino acids in the  $\alpha$ 1-helix of ZAR1 abrogates  $\text{Ca}^{2+}$  influx and impairs cell death activity and  
275 ZAR1 disease resistance, but not formation and membrane association of the ZAR1 resistosome (Wang  
276 *et al.*, 2019a,b; Bi *et al.*, 2021). The S902F\_F935I substitutions affect residues in the 14<sup>th</sup> and 15<sup>th</sup> LRRs  
277 of MLA13 (Fig. 4A) and the corresponding receptor is not expected to detect AVR<sub>A13</sub>-1 as it is encoded  
278 by the barley line SxGP DH-47 (cross of cultivars SusPtrit and Golden Promise), which is fully susceptible  
279 to *Bgh* isolates carrying avirulent AVR<sub>a13</sub> (Bettgenhaeuser *et al.*, 2021).

280 We first tested our assumption that the MLA13 mutants exhibit altered cell death activities  
281 (inactive/auto-active) compared to wild-type. We expressed the corresponding gene constructs in *N.*  
282 *benthamiana* leaves and qualitatively determined cell death in the presence and absence of AVR<sub>A13</sub>-1.  
283 As reported for other MLA variants (Bai *et al.*, 2012), MLA13<sup>H501G</sup> and MLA13<sup>F99E</sup> showed effector-  
284 independent cell death activity in this assay. In contrast, the Walker A-motif mutant MLA13<sup>D284A</sup> and  
285 SusPtrit MLA13<sup>S902F\_F935I</sup> receptor variants are unable to trigger host cell death when expressed  
286 together with AVR<sub>a13</sub>-1. However, expression of MLA13<sup>D2A\_E17A</sup>, which is thought to be impaired in  $\text{Ca}^{2+}$   
287 and cell death signalling (Bi *et al.*, 2021), resulted in effector-independent cell death in *N. benthamiana*  
288 leaves within 2 dpi (Fig. 4B). All MLA13 variants are detectable as fusion proteins after transient  
289 expression in *N. benthamiana* (Fig. 4C).

290 We next determined the ability of AVR<sub>A13</sub>-V2 to bind MLA13<sup>H501G</sup>, MLA13<sup>F99E</sup>, MLA13<sup>D284A</sup>, MLA13<sup>D2A\_E17A</sup>  
291 and MLA13<sup>S902F\_F935I</sup> in a Y2H assay. Again, MLA13<sup>D502V</sup> and MLA13<sup>K207R</sup> variants served as negative  
292 controls. Yeast samples expressing AD\_AVR<sub>a13</sub>-V2 together with wild-type *BD-Mla13* grew to a dilution  
293 of OD600 = 0.001 and to a dilution of OD600 = 0.01 when wild-type MLA13 was replaced with  
294 MLA13<sup>D2A\_E17A</sup> or MLA13<sup>F99E</sup>. When wild-type MLA13 was replaced by MLA13<sup>D284A</sup>, MLA13<sup>K207R</sup> o  
295 MLA13<sup>S902F\_F935I</sup> showed growth in the absence of leucine (Fig. 4D) although these MLA13 variants are  
296 stably expressed in yeast (Fig. 4E). The MLA F99 residue is not conserved in other CNLs and therefore,  
297 the currently available CNL resistosome structures of ZAR1 and Sr35 cannot give functional insight to  
298 the role of this residue. However, the ZAR1 resistosome structures postulate that upon ligand binding,  
299 the release of the  $\alpha$ 1-helix in CNLs is an important conformational change that occurs immediately

300 before resistosome formation (Wang *et al.*, 2019a,b). We thus speculate that the auto-activity of  
301 MLA13<sup>D2A\_E17A</sup> is a result of mutation-induced  $\alpha$ 1-helix release. If this is the case, then this auto-activity  
302 cannot be inhibited by the dominant-negative AVR<sub>A13</sub>-V2 ligand. When compared to EV, co-expression  
303 of AVR<sub>A13</sub>-V2-mYFP with MLA13<sup>D2A\_E17A</sup> in *N. benthamiana* leaves had indeed no impact on the average  
304 cell death score, whereas auto-activity of wild-type MLA13 was again inhibited by co-expression of  
305 AVR<sub>A13</sub>-V2-mYFP (Fig. 4F).

306

### 307 **Activity of cation channels is required for MLA13 cell death**

308 In ZAR1, the negatively charged residues on the inner lining of the ZAR1 resistosome funnel are  
309 required for Ca<sup>2+</sup> channel activity, and substitutions of these amino acids impaired ZAR1 signalling (Bai  
310 *et al.*, 2012; Wang *et al.*, 2019b). By contrast, such substitutions in Sr35 had no effect on cell death or  
311 channel activity (Förderer *et al.*, 2022a), and the same appears to be true for MLA13 D2A\_E17A (Fig.  
312 4B). The data suggest that MLA13 does not require the negatively charged amino acids of the  $\alpha$ 1-helix  
313 in the CC domain for cell death signalling. We thus aimed to determine whether Ca<sup>2+</sup> channel activity  
314 is needed for MLA13-mediated cell death in barley by applying the potent cation channel inhibitor  
315 LaCl<sub>3</sub>. Toward this end, we expressed a luciferase (LUC) reporter together with AVR<sub>A13</sub>-1 in barley  
316 mesophyll protoplasts, prepared from the *Mla13*-containing near-isogenic backcross line Manchuria  
317 (CI 16155), and measured LUC activity as an indicator of protoplast viability. Protoplasts from the  
318 cultivar Manchuria (CI 2330), which lack *Mla13*, served as control. With increasing LaCl<sub>3</sub> concentration,  
319 we observed a reduction in LUC activity by up to 50% of CI 2330 protoplasts (20  $\mu$ M LaCl<sub>3</sub>), suggesting  
320 a detrimental impact of LaCl<sub>3</sub> treatment on protoplast viability independent of *Mla13* or a reduction in  
321 LUC activity independent of cell death. Nonetheless, in the absence of LaCl<sub>3</sub>, LUC activity is on average  
322 more than 70% lower in *Mla13* protoplasts transfected with the AVR<sub>A13</sub>-1 construct than in protoplasts  
323 that do not express *Mla13* (Fig. 5A). This difference in LUC activity between the two samples diminishes  
324 with increasing LaCl<sub>3</sub> concentration and is no longer significant in samples treated with 10  $\mu$ M LaCl<sub>3</sub>.  
325 Although LUC activity decreases with increasing LaCl<sub>3</sub> concentrations, LaCl<sub>3</sub> treatment does not affect

326 AVR<sub>A13</sub>-1 protein stability in protoplasts of the cultivar Manchuria (Fig. 5B). Although we cannot  
327 exclude that LaCl<sub>3</sub> treatment affects *Mla13* expression in barley line CI 16155, our data show that  
328 blocking the function of cation channels by LaCl<sub>3</sub> compromises MLA13-mediated cell death in barley  
329 leaf protoplasts.

330

## 331 **Discussion**

332 Functional studies of effector recognition by NLRs are not only important for a better understanding  
333 of plant disease resistance but also for dissecting the mechanisms pathogens employ to overcome  
334 NLR-mediated resistance. To address both aspects, we studied MLA13-mediated recognition of the  
335 barley powdery mildew AVR<sub>A13</sub> effector family with a particular focus on AVR<sub>A13</sub>-V2, which originated  
336 from a *Bgh* isolate that has overcome *Mla13* resistance.

### 337 **Mutations in the NB site of MLA13 abrogate association with its matching effector**

338 The residues of the MLA LRR domains, which are under purifying selection, are thought to serve as  
339 effector contact residues (Seeholzer *et al.*, 2010; Maekawa *et al.*, 2019). Residues S<sup>902</sup> and P<sup>935</sup> in the  
340 14<sup>th</sup> and 15<sup>th</sup> LRRs of MLA13 are exchanged for other amino acids in MLA13 encoded by a cultivar that  
341 has lost *Mla13* resistance function (Bettgenhaeuser *et al.*, 2021), and we showed here that the residues  
342 are indeed required for effector binding and activation of MLA13. Importantly, however, our data show  
343 that not only the contact residues in the NLR LRR domain mediate receptor-effector association, but  
344 that an intact, ADP-bound receptor conformation is required for efficient effector-receptor association  
345 in yeast. Disruption of this intact conformation by mutations in the NB site of MLA13, which result in  
346 the so-called 'MHD' (mimicking ATP binding) and 'P-loop' (no binding of ADP/ATP) receptor versions  
347 (Fig. S4) fully abrogated interaction with the matching AVR<sub>A13</sub> effector variants in Y2H assay, probably  
348 because of spatial hindrance. One possible explanation for this hindrance is that residues of the MLA13  
349 NB domain are engaged in the formation of an effector-accessible conformation of the MLA LRR  
350 domain, i.e. a site of effector entry (Förderer *et al.*, 2022b) only provided by ADP-bound MLA13 (Fig.

351 S4). At this effector entry site of ADP-bound MLA13, the MLA13 NB domain may transiently contact  
352 the AVR<sub>A13</sub> ligand and this contact may be required for the the steric clash that dislocates the NB  
353 domain for exchange of ADP to ATP. In fact, one intermediate state structure of the ADP-bound ZAR1  
354 monomer bound to the activating PBL2 ligand (PDB 6j5v) implies contact between the ZAR1 NB domain  
355 and the PBL2 ligand ultimately before the steric clash that allows effector-mediated ZAR1 resistosome  
356 formation, although association between the contact-forming residues cannot be detected in the  
357 active, ATP-bound ZAR1 resistosome (Wang *et al.*, 2019b). An alternative hypothesis of our findings is  
358 a transient association between AVR<sub>A13</sub> and MLA13, implying that conformational changes of MLA13  
359 to the active oligomeric ATP-bound state lead to dislodging of AVR<sub>A13</sub> effectors from the resistosome  
360 complex. However, this model is in contrast with the observation of all active NLR resistosome  
361 structures available to date, where each NLR monomer stably binds one activating ligand. The  
362 autoactive wheat CNL Sr50<sup>MHD</sup> mutant was also impaired in AvrSr50 association when compared to  
363 wild-type Sr50 (Fig. S3), but our data contrast with the example of enhanced association between the  
364 flax TNL L6 MHD version and its matching effector (Bernoux *et al.*, 2016). We therefore suggest  
365 different requirements for NB domains at the site of effector entry in CNLs and TNLs or for individual  
366 NLRs in general. However, we cannot entirely exclude that this difference may be due to the initiation  
367 of yeast cell death upon expression of CNL<sup>MHD</sup>, whereas TNL<sup>MHD</sup> variants cannot induce cell death in  
368 yeast. However, the MLA13<sup>MHD</sup> and Sr50<sup>MHD</sup> protein levels are as stable as those of wild-type receptors  
369 and yeast growth in the presence of leucine is similar between yeasts expressing wild-type receptors  
370 and the MHD variants (Fig. 3B and Fig. S3D).

371 We and others have previously attempted to detect interaction between CNLs and their matching  
372 effector *in planta* by using NLR P-loop mutants to prevent NLR-mediated cell death. Blocking TNL  
373 ROQ1-mediated cell death signalling in *eds1* knockout lines in *N. benthamiana* was important for  
374 purification of the tetrameric ROQ1-effector resistosome (Martin *et al.*, 2020). Our data showing that  
375 MLA13 P-loop variants have lost the ability to bind matching effectors might explain why previous  
376 attempts to detect effector – receptor interaction using P-loop CNL mutants were unsuccessful.

377 **Amino acid exchanges in the MLA13  $\alpha$ 1-helix deregulate auto-inhibition but not  $\text{Ca}^{2+}$  - dependent**  
378 **MLA13 cell death function.**

379 Negatively charged residues in the  $\alpha$ 1-helix of NLR CC domains are thought to be required for  $\text{Ca}^{2+}$   
380 channel activity of CNL resistosomes (Förderer *et al.*, 2022b). This was inferred from the observation  
381 that replacement of these residues with alanine abrogated ZAR1  $\text{Ca}^{2+}$  channel activity and ZAR1-  
382 mediated resistance. We observed that the negatively charged residues MLA13<sup>D2</sup> and MLA13<sup>E17</sup> in the  
383  $\alpha$ 1-helix are not required for MLA13-mediated cell death and that these amino acid exchanges instead  
384 lead to effector-independent cell death in *N. benthamiana*. We speculate that in the absence of a  
385 matching effector, these negatively-charged amino acids in MLA13 are required for burying the  $\alpha$ 1-  
386 helix and that this auto-repression malfunctions in MLA13<sup>D2A\_E17A</sup>, i.e. the  $\alpha$ 1-helix is exposed and  
387 available for oligomerization (Fig. S4). However, our data cannot clarify whether the hypothetical auto-  
388 active  $\alpha$ 1-helix conformation of MLA13<sup>D2A\_E17A</sup> allows the exchange of ADP to ATP or whether an ADP-  
389 bound NB domain is even capable of forming a functional oligomer (Fig. S4).

390 The cell death autoactivity of MLA13<sup>D2A\_E17A</sup> contrasts with similar ZAR1 mutants, which abolish cell  
391 death, but the data is comparable to results reported for other CNLs, including wheat Sr35 (Adachi *et*  
392 *al.*, 2019; Förderer *et al.*, 2022a). Despite these differences, we demonstrate that MLA13-dependent  
393 and AVR<sub>A13</sub>-triggered cell death activity in barley protoplasts is impaired in the presence of the cation  
394 channel inhibitor LaCl<sub>3</sub>, suggesting that cation transport across plant cell membranes by a putative  
395 MLA13 channel and/or other cation channels is also an important biochemical activity of the deduced  
396 MLA13 resistosome. Although the exact mechanism for cation transport in the putative MLA13  
397 resistosome remains to be determined, our data align with reports on other CNLs that confer calcium  
398 channel-dependent cell death (Grant *et al.*, 2000; Förderer *et al.*, 2022a) and underline that  
399 perturbation of  $\text{Ca}^{2+}$  homeostasis is a fundamental component of both, TNL- and CNL-mediated cell  
400 death in plants (Jubic *et al.*, 2019; Saur *et al.*, 2021; Jacob *et al.*, 2021; Förderer *et al.*, 2022a).

401 **A single effector residue can disrupt NLR activation**



402 As LRR domains have the potential to bind a variety of proteinaceous ligands, engineering the LRR  
403 domains of NLRs to bind pathogen effectors that are not recognized by the natural immune system  
404 appears to be an attractive strategy for controlling plant diseases. Our data demonstrate that ligand  
405 binding *per se* is not sufficient for NLR activation and that a single surface-exposed residue, L<sup>119</sup> in full-  
406 length AVR<sub>A13</sub>-V2, can abrogate NLR activation despite enhanced interaction. This dominant-acting  
407 interaction may directly allow AVR<sub>A13</sub>-V2 to outcompete all AVR<sub>A13</sub>-1 effectors for association with  
408 MLA13 and subsequent receptor activation. Alternatively, AVR<sub>A13</sub>-V2 sequestration of some MLA13  
409 monomers might be sufficient to disrupt putative MLA13 resistosome formation if a threshold of  
410 ligand-activated CNLs must be available for pentameric CNL resistosomes to be formed (Förderer *et*  
411 *al.*, 2022b). The possibility that AVR<sub>A13</sub>-V2 sequesters AVR<sub>A13</sub>-1 from activation of MLA13 appears less  
412 likely because AVR<sub>A13</sub>-V2 can also inhibit MLA13 auto-activity (Fig. 2). The contact residues responsible  
413 for the activation of MLA13 by AVR<sub>A13</sub> are likely unique, despite the overall structural similarity of AVR<sub>A</sub>  
414 effectors and allelic, highly sequence similar MLA receptors (Seeholzer *et al.*, 2010; Bauer *et al.*, 2021).  
415 This appears to be also true for the residues of AVR<sub>A13</sub>-V2 (including L<sup>119</sup>) that mediate MLA13  
416 interaction, as neither the enhanced interaction, nor the dominant-negative effect of AVR<sub>A13</sub>-V2 was  
417 detected when MLA13 was replaced by the highly sequence-similar MLA1 or MLA7 NLRs. The overall  
418 high sequence and predicted structural identity between AVR<sub>A13</sub>-1 and AVR<sub>A13</sub>-V2, as well as the  
419 identification of a single residue, L<sup>119</sup> of AVR<sub>A13</sub>-V2, as the main driver of enhanced MLA13 interaction,  
420 suggest that the binding surfaces to the MLA13 receptor overlap. However, our data implies that  
421 AVR<sub>A13</sub>-V2 locks MLA13 into an inactive, effector-bound state by preventing the receptor from  
422 transitioning to one of the conformational changes downstream of effector binding (Fig. S5). AVR<sub>A13</sub>-  
423 V2 cannot inhibit cell death signalling of MLA13 constitutive-gain of function mutants with amino acid  
424 replacements in the CC domain despite interaction with MLA13<sup>D2A\_E17A</sup> (Fig. 4D). We therefore suggest  
425 that the inhibitory function of AVR<sub>A13</sub>-V2, mediated by L<sup>199</sup>, affects conformational changes that take  
426 place before the release of the MLA13  $\alpha$ 1-helix; i.e. AVR<sub>A13</sub>-V2 binding to MLA13 either fails to induce  
427 an inter-domain steric clash in the receptor or blocks the transition to the steric clash-mediated open  
428 conformation, which allows exchange of ADP to ATP in the NB site of MLA13 (Fig. S5). Alternatively,

429 AVR<sub>A13</sub>-V2 binding to MLA13 induces a steric clash, but AVR<sub>A13</sub>-V2 association inhibits the release of  
430 the  $\alpha$ 1-helix from autorepression. As MLA13 MHD mutants are generally inaccessible to effector  
431 binding in Y2H assay (including binding to avirulent AVR<sub>A13</sub>-1), our data cannot clarify whether the loss  
432 of inhibitory function of AVR<sub>A13</sub>-V2 on MLA13 cell death takes place before or after ADP exchange to  
433 ATP in wild-type MLA13. Collectively, we demonstrate that the stable interaction between AVR<sub>A13</sub>-V2  
434 and inactive MLA13 has the potential to define distinct conformations of intermediate states of CNL  
435 receptors. This knowledge is currently largely elusive for both animal and plant NLRs. Understanding  
436 such conformations will help ensure that future synthetic NLRs do not become locked into  
437 intermediate non-functional states.

#### 438 **Role of AVR<sub>A13</sub>-V2 in the breakdown of *Mla13* resistance in the European *Bgh* population**

439 Evasion of NLR-mediated pathogen recognition is usually mediated by diversification of the pathogen's  
440 effector repertoire, including allelic variation of effector genes that results in abrogation of effector-  
441 NLR receptor associations. This model applies to the virulent variant AVR<sub>A13</sub>-V1. However, AVR<sub>A13</sub>-V2  
442 not only interacts strongly with MLA13, but also inhibits MLA13 cell death signalling in a dominant  
443 manner. This raises the possibility that *Bgh* AVR<sub>A13</sub>-V2 facilitates rapid clonal dispersal of virulence in  
444 *Bgh* populations that are avirulent on *Mla13*. In the European *Bgh* population the virulence frequency  
445 on *Mla13* increased from 0.2% in the 1980s to as high as 60% in 1995 (Gacek, 1987; Jørgensen, J.H.;  
446 Hovmøller, 1987; Hovmøller *et al.*, 2000), suggesting a major shift in genetic variation of *AVR<sub>A13</sub>* on a  
447 continental scale. By contrast, virulence on *Mla13* barley appears to be low at a global scale, with only  
448 7% of *Bgh* isolates in a global strain collection overcoming *Mla13*-mediated resistance (Lu *et al.*, 2016;  
449 Rsaliyev *et al.*, 2017; Saur *et al.*, 2019a). In addition, *AVR<sub>A13</sub>/BGH\_20990* has a very low frequency of  
450 non-synonymous SNPs in tested global and local *Bgh* populations (0.9 non-synonymous SNPs/100 bp  
451 coding sequence), indicating an overall low genetic diversity of *AVR<sub>A13</sub>* (Saur *et al.*, 2019a). Our data  
452 demonstrate a dominant negative activity of AVR<sub>A13</sub>-V2 on MLA13 therefore suggesting that the  
453 breakdown of *Mla13* resistance was caused by direct manipulation of the receptor activation  
454 mechanism rather than by evasion of MLA13 recognition.

455 **Materials and methods**

456 ***Plant and fungal materials and growth conditions***

457 Near isogenic lines (NILs) of the barley cultivar Manchuria were grown at 19 °C, 70% relative humidity,  
458 and under a 16 h photoperiod. *N. benthamiana* plants were grown under standard greenhouse  
459 conditions under a 16 h photoperiod. Maintenance of *Bgh* isolates was carried out as described  
460 previously (Lu *et al.*, 2016).

461 ***Generation of expression constructs***

462 For transient gene expression assays in *N. benthamiana* and barley protoplasts and for yeast 2-hybrid  
463 interaction studies, coding sequences of receptor and effector genes with or without stop codons were  
464 either synthesized as pDONR221 entry clones from GeneArt (Thermo Scientific), or were published  
465 previously (Saur *et al.*, 2019a). Respective genes were transferred from entry or donor vectors into  
466 the expression vectors pIPKb002 (Himmelbach *et al.*, 2007), pGWB414, pGWB517 (Nakagawa *et*  
467 *al.*, 2007), pXCSG-GW-HA, pXCSG-GW-Myc, pXCSG-GW-mYFP (Garcia *et al.*, 2010), pAMpAT-GW-  
468 BirA-4Myc, pLexA-GW, or pB42AD-GW (Shen *et al.*, 2007) as indicated using LR Clonase II (Thermo  
469 Scientific).

470 ***Transient gene expression by Agrobacterium-mediated transformation of Nicotiana benthamiana***  
471 ***leaves***

472 *Agrobacterium tumefaciens* GV3101:pMP90K were freshly transformed with respective constructs of  
473 interest and grown from single colonies in liquid Luria broth medium containing appropriate antibiotics  
474 for ~ 24 hours at 28 °C to an OD<sub>600</sub> not higher than 1.5. Bacterial cells were harvested by centrifugation  
475 at 2500 × *g* for 15 min followed by resuspension in infiltration medium (10 mM MES, pH 5.6, 10 mM  
476 MgCl<sub>2</sub>, and 200 μM acetosyringone) to a final OD<sub>600</sub> = 1. Cultures were incubated for two to four h at  
477 28 °C with 180 rpm shaking before infiltration into leaves from three to five-week-old *N. benthamiana*  
478 plants. For co-expression of multiple constructs, Agrobacteria carrying the genes of interest were  
479 mixed equally unless indicated otherwise. Cell death was assessed one to five days post infiltration as

480 indicated and tissue for immunodetection analysis was harvested one to two days post infiltration as  
481 indicated.

482 ***Protein extraction from *Nicotiana benthamiana* leaf tissue for protein detection by immunoblotting***

483 Frozen leaf material was ground to a fine powder using pre-cooled adapters in a bead beater (Retsch)  
484 and thawed in cold plant protein extraction buffer (150 mM Tris-HCl, pH 7.5, 150 mM NaCl, 10 mM  
485 EDTA, 10% (v/v) glycerol, 5 mM DTT, 2% (v/v) plant protease inhibitor cocktail (Sigma), 1 mM PMSF,  
486 and 0.5 % (v/v) IGEPAL) at a ratio of 50 mg fresh tissue/150 µl of extraction buffer. Extracts were  
487 centrifuged twice at 15,000 × *g* for 10 min at 4 °C. For SDS-PAGE, extracts were diluted 4:1 with 4x SDS  
488 loading buffer and heated to 85 °C for 10 to 15 min before again removing insoluble material by  
489 centrifugation at 15,000 × *g* for 5 min. For pull-down of mYFP-tagged proteins, GFP-Trap-MA  
490 (Chromotek) beads were incubated in equilibration buffer for 1 h at 4 °C and subsequently mixed with  
491 one ml of protein extracts for 2 to 3 h at 4 °C with slow but constant rotation. Then, conjugated GFP-  
492 Trap beads were washed five times in 1 ml of cold wash buffer at 4 °C before interacting proteins were  
493 stripped from the beads by boiling in 25 µl of 4x SDS loading buffer for 5 min. Samples were separated  
494 on 8% to 13% SDS-PAGE gels, blotted onto PVDF membrane, and probed with anti-GFP (abcam  
495 ab6556), anti-Myc (abcam ab9106) or anti-HA (Roche 3F10) followed by anti-rabbit IgG-HRP (Santa  
496 Cruz Biotechnology sc-2313) or anti-rat IgG-HRP (abcam ab97057) secondary antibodies. Epitope-  
497 tagged proteins were detected by the HRP activity on SuperSignal West Femto Maximum Sensitivity  
498 Substrate (Thermo Fisher 34095) using a Gel Doc™ XR+ Gel Documentation System (Bio-Rad).

499 ***Proximity-dependent protein labelling of proteins transiently expressed in *Nicotiana benthamiana****  
500 ***leaves.***

501 Pull-down of biotinylated proteins was performed by following published protocols (Conlan *et al.*,  
502 2018) with the alteration that free biotin was not removed before adding streptavidin to protein  
503 extracts. Instead, we applied a 10 µM biotin solution to the plant tissue (instead of a 75 µM solution  
504 (Conlan *et al.*, 2018). We followed a sequence of infiltrations to minimise MLA-mediated cell death of

505 *N. benhamiana* leaf tissue: *Agrobacterium tumefaciens* GV3101::pMP90K carrying 35S:*Mla*-4Myc  
506 constructs were grown from glycerol stocks and infiltrated (day 1). At 24 h post infiltration of the *Mla*  
507 constructs, *Agrobacteria* freshly transformed with 35S:*AVR<sub>o13</sub>*-*BirA*-4Myc constructs or *EV* were  
508 infiltrated as indicated (day 2). Ten  $\mu$ M of free biotin in infiltration buffer lacking acetosyringone was  
509 infiltrated at 24 h after the second infiltration and 48 h after the first infiltration (day 3). Tissue for  
510 streptavidin-based precipitation of biotinylated proteins was harvested 24 h post infiltration of free  
511 biotin. Frozen leaf material was ground to a fine powder using pre-cooled adapters in a bead beater  
512 (Retsch) and thawed in cold plant denaturing extraction buffer (150 mM Tris-HCl, pH 7.5, 150 mM NaCl,  
513 10 mM EDTA, 5% (v/v) glycerol, 5 mM DTT, 1% (v/v) plant protease inhibitor cocktail (Sigma), 1 mM  
514 NaF, 1 mM sodium orthovanadate, 1 mM PMSF, 1% TritonX-100 and 0.5 % (w/v) SDS) at a ratio of 300  
515 mg fresh tissue/2 ml of denaturing extraction buffer. Extracts were incubated rotating at 4°C for 30  
516 minutes before the removal of insoluble material by centrifugation at 21,000  $\times$  g for 30 min at 4 °C.  
517 Streptavidin coated Dynabeads (100  $\mu$ L/sample, MyOne streptavidin C1, Thermo Fisher) were  
518 incubated in wash buffer (150 mM Tris-HCl, pH 7.5, 150 mM NaCl, 10 mM EDTA, 5% (v/v) glycerol, 1%  
519 (v/v) plant protease inhibitor cocktail (Sigma)) containing 1% BSA for 1 h at 4 °C and subsequently  
520 mixed with 2two ml of protein extracts for 3 h at 4 °C with slow but constant rotation. Then, conjugated  
521 Streptavidin beads were washed four times in 1 ml of cold wash buffer before interacting proteins  
522 were stripped from the beads by heating to 85°C for 10-15 min in 50  $\mu$ l of 4x SDS loading buffer. From  
523 these 50  $\mu$ l, 30 $\mu$ l were loaded on 9% SDS-PAGE gels. Proteins were blotted onto PVDF membrane and  
524 probed with anti-Myc (abcam ab9106) followed by anti-rabbit IgG-HRP (Santa Cruz Biotechnology sc-  
525 2313) secondary antibodies. Myc-tagged proteins were detected by the HRP activity on SuperSignal  
526 West Femto Maximum Sensitivity Substrate (Thermo Fisher 34095) using a Gel Doc™ XR+ Gel  
527 Documentation System (Bio-Rad).

### 528 ***Transient gene expression and cell death assay in barley protoplasts***

529 Assessment of protoplast cell death using a luciferase activity as a proxy for cell viability was performed  
530 as described (Saur *et al.*, 2019b). Briefly, *AVR<sub>o13</sub>* -V2 cDNA lacking the respective signal peptide was

531 expressed from the *Zea mays* ubiquitin promoter in protoplasts isolated from barley cultivar  
532 Manchuria CI 2330 and cultivar Manchuria *Mla13* NIL CI 16155. For this, the epidermis of the primary  
533 leaves from seven to eight-day-old plants was removed before leaves were immersed in the enzyme  
534 solution. A total volume of 30  $\mu$ L water containing 5  $\mu$ g of the *luciferase* reporter and 6  $\mu$ g of the *AVR<sub>013</sub>-*  
535 *V2* effector construct or an *EV* was transfected into 300  $\mu$ L barley protoplasts at a concentration of  $5 \times$   
536  $10^5$  protoplasts/ml solution. Protoplasts were recovered in regeneration buffer supplemented with  
537  $\text{LaCl}_3$  as indicated. About 16 h after transfection, protoplasts were collected by centrifugation at 1000  
538  $\times g$ , the supernatant was discarded, and 200  $\mu$ L 2x cell culture lysis buffer were added (Promega,  
539 E1531). Luciferase activity was determined by mixing 50  $\mu$ L of protoplast lysate with 50  $\mu$ L luciferase  
540 substrate (Promega, E1501) in a white 96-well plate and light emission was measured at 1 second/well  
541 using a microplate luminometer (Centro, LB960).

#### 542 ***Protein extraction from barley protoplasts and fusion protein detection by immunoblotting***

543 To determine the effect of  $\text{LaCl}_3$  treatment on *AVR<sub>A13</sub>* protein, for each  $\text{LaCl}_3$  treatment, 300  $\mu$ g of the  
544 *AVR<sub>013</sub>-V2-mYFP* effector construct or an *EV* was transfected into 3 ml pf barley protoplasts cultivar  
545 Manchuria CI 2330 at a concentration of  $5 \times 10^5$  protoplasts/ml solution. Protoplasts were recovered  
546 in regeneration buffer supplemented with the  $\text{LaCl}_3$  to the final concentrations indicated. About 16 h  
547 post transfection, protoplasts were collected by centrifugation at 1000  $\times g$ , the supernatant was  
548 discarded and protoplast pellets were frozen in liquid nitrogen. Total protein was extracted by the  
549 addition of 100  $\mu$ L cold plant protein extraction buffer (200 mM Tris-HCl, pH 7.5, 150 mM NaCl, 10 mM  
550 EDTA, 10% (v/v) glycerol, 12 mM DTT, 2% (v/v) plant protease inhibitor cocktail (Sigma), and 1% (v/v)  
551 IGEPAL) to each protoplast pellet. Extracts were centrifuged at 15,000  $\times g$  for 5 min at 4  $^\circ\text{C}$ . For SDS-  
552 PAGE, extracts were diluted 4:1 with 4x SDS loading buffer and heated to 85  $^\circ\text{C}$  for 10 to 15 min before  
553 removing insoluble material by centrifugation at top speed for 5 minutes. Samples were separated on  
554 10% SDS-PAGE gels, blotted onto PVDF membrane, and probed with anti-GFP (Santa Cruz  
555 Biotechnology sc-8334 or abcam ab6556) followed by anti-rabbit IgG-HRP (Santa Cruz Biotechnology  
556 sc-2313) secondary antibodies. mYFP tagged proteins were detected by the HRP activity on SuperSignal

557 West Femto Maximum Sensitivity Substrate (Thermo Fisher 34095) using a Gel Doc™ XR+ Gel  
558 Documentation System (Bio-Rad).

559 ***Yeast 2-hybrid assay and yeast protein extraction***

560 *NLR* receptor gene variants were cloned into the pLexA-GW vector (Shen *et al.*, 2007) for expression  
561 with an N-terminal LexA activation domain under the control of a constitutive ADH1 promoter (BD-  
562 NLR). Effector variants were cloned into pB42AD-GW (Shen *et al.*, 2007) for expression with an N-  
563 terminal B42 activation domain followed by the HA-tag under the control of an inducible GAL1  
564 promoter (AD-AVR). Using the lithium acetate method (Gietz and Woods, 2002), bait and prey  
565 constructs were co-transformed into the yeast strain EGY4.8 p8op and successful transformants were  
566 selected by colony growth on SD-UHW/Glu (2% (w/v) Glucose, 0.139% (w/v) yeast synthetic drop-out  
567 medium pH 6 without uracil, histidine, tryptophan, 0.67% (w/v) BD Difco yeast nitrogen base, 2% (w/v)  
568 Bacto Agar). Yeast transformants were grown to OD<sub>600</sub> = 1 in liquid SD-UHW/Glu before harvesting cells  
569 for drop out of the dilution series on SD-UHW/Gal/Raf media (SD-UHW without glucose but with 2%  
570 (w/v) Galactose 1 % (w/v) Raffinose, with (-UHW) or without Leucine (-UHWL)) and incubated for one  
571 to two weeks at 30 °C.

572 For protein detection, yeast strains were grown to OD<sub>600</sub> = 1 in SD-UHW/Gal/Raf liquid medium at 30 °C  
573 and 200 rpm shaking, and proteins were extracted using 200 mM NaOH (NaOH method) (Zhang *et*  
574 *al.*, 2011)). Total protein samples were separated on 9% or 12% SDS-PAGE gels, blotted onto PVDF  
575 membrane, and probed with anti-HA (Merck, clone 3F10) or anti-LexA (Santa Cruz Biotechnology,  
576 sc7544) primary antibodies followed by anti-rat (Santa Cruz Biotechnology, sc2065) or anti-mouse IgG-  
577 HRP (Santa Cruz Biotechnology, sc2005) secondary antibodies as appropriate. HA and LexA fusion  
578 proteins were detected by HRP activity on SuperSignal West Femto Maximum Sensitivity Substrate  
579 (Thermo Fisher 34095) using a Gel Doc™ XR+ Gel Documentation System (Bio-Rad).

580

581

582 **Supplement**

583 **Figure S1:** Proximity-dependent protein labelling confirms requirement of AVR<sub>A13</sub> C-terminus for  
584 MLA13 interaction.

585 **Figure S2:** Specificity control to Fig. 1D.

586 **Figure S3:** Gain-of-function and loss-of-function NLR mutants and their ability to bind matching  
587 avirulence effectors.

588 **Figure S4:** Schematic model of MLA13 wild-type and mutant conformations.

589 **Figure S5:** Schematic models of MLA13 activation by *Bgh* AVR<sub>A13</sub> -1 and inhibition by AVR<sub>A13</sub>-V2,  
590 respectively.

591 **Supplemental Raw Data:** raw data of all figures.

592

593 **Acknowledgements**

594 We would like to thank Sabine Haigis and Petra Köchner for technical support and maintenance of *Bgh*  
595 isolates and Ksenia Krasileva for critical comments on the manuscript. Although the resulting crosses  
596 could not be assessed for *Bgh* infection due to loss of MLA13 resistance in control lines, we highly  
597 acknowledge the group of Matthew Moscou that crossed *Mla13* barley with AVR<sub>A13</sub>-V2 transgenic lines  
598 for assessing AVR<sub>A13</sub>-V2-mediated inhibition of Mla13 resistance. IMLS, TM and PSL acknowledge  
599 support from the Cluster of Excellence on Plant Sciences (CEPLAS) funded by the Deutsche  
600 Forschungsgemeinschaft (DFG, German Research Foundation) under Germany's Excellence Strategy –  
601 EXC 2048/1 – Project ID: 390686111 and funding from the DFG Collaborative Research Centre Project-  
602 ID 414786233 (SFB 1403). This work was also funded by the DFG Emmy Noether Programme (SA  
603 4093/1-1 to IMLS), the Daimler and Benz Foundation (IMLS) and the Max Planck Society (PSL).

604

605



606 **Author contributions**

607 EEC, MBS, TM, PSL & IMLS designed the research, EEC, MBS and IMLS performed the experiments and  
608 data analysis. EEC, IMLS and PSL wrote the paper with contributions from all authors.

609 **Conflict of interest**

610 The authors declare no conflict of interest.

611 **Data availability**

612 All relevant data are available within the paper and its supplementary data published online.

## References

- Adachi H, Contreras MP, Harant A, et al.** 2019. An N-terminal motif in NLR immune receptors is functionally conserved across distantly related plant species. *Elife* **8**, eLife.49956.
- Bai SW, Liu J, Chang C, et al.** 2012. Structure-Function Analysis of Barley NLR Immune Receptor MLA10 Reveals Its Cell Compartment Specific Activity in Cell Death and Disease Resistance. *Plos Pathogens* **8**, e1002752.
- Bauer S, Yu D, Lawson AW, Saur IM, Frantzeskakis L, Kracher B, Logemann E, Chai J, Maekawa T, Schulze-Lefert P.** 2021. The leucine-rich repeats in allelic barley MLA immune receptors define specificity towards sequence-unrelated powdery mildew avirulence effectors with a predicted common RNase-like fold. *PLOS Pathogens* **17**, e1009223.
- Bendahmane A, Farnham G, Moffett P, Baulcombe DC.** 2002. Constitutive gain-of-function mutants in a nucleotide binding site-leucine rich repeat protein encoded at the Rx locus of potato. *Plant Journal* **32**, 195–204.
- Bernoux M, Burdett H, Williams SJ, et al.** 2016. Comparative Analysis of the Flax Immune Receptors L6 and L7 Suggests an Equilibrium-Based Switch Activation Model. *Plant Cell* **28**, 146–159.
- Bernoux M, Ve T, Williams S, Warren C, Hatters D, Valkov E, Zhang XX, Ellis JG, Kobe B, Dodds PN.** 2011. Structural and Functional Analysis of a Plant Resistance Protein TIR Domain Reveals Interfaces for Self-Association, Signaling, and Autoregulation. *Cell Host & Microbe* **9**, 200–211.
- Bettgenhaeuser J, Hernández-Pinzón I, Dawson AM, et al.** 2021. The barley immune receptor Mla recognizes multiple pathogens and contributes to host range dynamics. *Nature Communications* **12**, 6915.
- Bi G, Su M, Li N, et al.** 2021. The ZAR1 resistosome is a calcium-permeable channel triggering plant immune signaling. *Cell* **184**, 3528-3541.e12.
- Brabham HJ, Cruz DGD Ia, Were V, et al.** 2022. Barley MLA3 recognizes the host-specificity determinant PWL2 from rice blast (*M. oryzae*). *bioRxiv*, doi:10.1101/2022.10.21.512921.
- Burdett H, Bentham AR, Williams SJ, Dodds PN, Anderson PA, Banfield MJ, Kobe B.** 2019. The Plant ‘Resistosome’: Structural Insights into Immune Signaling. *Cell Host & Microbe* **26**, 193–201.
- Cesari S.** 2018. Multiple strategies for pathogen perception by plant immune receptors. *New Phytologist* **219**, 17–24.
- Chen J, Upadhyaya NM, Ortiz D, et al.** 2017. Loss of AvrSr50 by somatic exchange in stem rust leads to virulence for Sr50 resistance in wheat. *Science* **358**, 1607–1610.
- Collier SM, Hamel LP, Moffett P.** 2011. Cell Death Mediated by the N-Terminal Domains of a Unique and Highly Conserved Class of NB-LRR Protein. *Molecular Plant-Microbe Interactions* **24**, 918–931.
- Conlan B, Stoll T, Gorman JJ, Saur I, Rathjen JP.** 2018. Development of a Rapid in planta BioID System as a Probe for Plasma Membrane-Associated Immunity Proteins. *Frontiers in Plant Science* **9**, 1882.
- Dinesh-Kumar SP, Baker BJ.** 2000. Structure-function analysis of the tobacco mosaic virus resistance gene N. *Proceedings of the National Academy of Sciences USA* **97**, 14789–94.
- Dodds PN, Lawrence GJ, Catanzariti AM, Teh T, Wang CIA, Ayliffe MA, Kobe B, Ellis JG.** 2006. Direct protein interaction underlies gene-for-gene specificity and coevolution of the flax resistance genes

and flax rust avirulence genes. *Proceedings of the National Academy of Sciences USA* **103**, 8888–8893.

**Dodds PN, Rathjen JP.** 2010. Plant immunity: towards an integrated view of plant-pathogen interactions. *Nature Reviews Genetics* **11**, 539–548.

**Förderer A, Li E, Lawson AW, et al.** 2022a. A wheat resistosome defines common principles of immune receptor channels. 532 | *Nature* | **610**.

**Förderer A, Yu D, Li E, Chai J.** 2022b. Resistosomes at the interface of pathogens and plants. *Current Opinion in Plant Biology* **67**, 102212.

**Gacek E.** 1987. Distribution of barley powdery mildew resistance and virulence in Poland 1984-1986. *Advances in agricultural biotechnology*, 93–98.

**Gao Z, Chung EH, Eitas TK, Dangl JL.** 2011. Plant intracellular innate immune receptor Resistance to *Pseudomonas syringae* pv. *maculicola* 1 (RPM1) is activated at, and functions on, the plasma membrane. *Proceedings of the National Academy of Sciences USA* **108**, 7619–7624.

**Garcia A v, Blanvillain-Baufume S, Huibers RP, Wiermer M, Li GY, Gobbato E, Rietz S, Parker JE.** 2010. Balanced Nuclear and Cytoplasmic Activities of EDS1 Are Required for a Complete Plant Innate Immune Response. *Plos Pathogens* **6**, e1000970.

**Gietz RD, Woods RA.** 2002. Transformation of yeast by lithium acetate/single-stranded carrier DNA/polyethylene glycol method. *Guide to Yeast Genetics and Molecular and Cell Biology*, **350**, 87–96.

**Glawe DA.** 2008. The powdery mildews: A review of the world's most familiar (yet poorly known) plant pathogens. *Annual Review of Phytopathology* **46**, 27–51.

**Grant M, Brown I, Adams S, Knight M, Ainslie A, Mansfield J.** 2000. The RPM1 plant disease resistance gene facilitates a rapid and sustained increase in cytosolic calcium that is necessary for the oxidative burst and hypersensitive cell death. *Plant Journal* **23**, 441–450.

**Himmelbach A, Zierold U, Hensel G, Riechen J, Douchkov D, Schweizer P, Kumlehn J.** 2007. A set of modular binary vectors for transformation of cereals. *Plant Physiology* **145**, 1192–1200.

**Horsefield S, Burdett H, Zhang XX, et al.** 2019. NAD(+) cleavage activity by animal and plant TIR domains in cell death pathways. *Science* **365**, 793–799.

**Hovmøller MS, Caffier V, Jalli M, et al.** 2000. Plant Genetics and Breeding The European barley powdery mildew virulence survey and disease nursery 1993-1999. *Agronomie, EDP Sciences*, **20**, 729–743.

**Howles P, Lawrence G, Finnegan J, McFadden H, Ayliffe M, Dodds P, Ellis J.** 2005. Autoactive alleles of the flax L6 rust resistance gene induce non-race-specific rust resistance associated with the hypersensitive response. *Molecular plant-microbe interactions : MPMI* **18**, 570–582.

**Huang S, Jia A, Song W, et al.** 2022. Identification and receptor mechanism of TIR-catalyzed small molecules in plant immunity. *Science* **377**.

**Jacob P, Kim NH, Wu F, et al.** 2021. Plant “helper” immune receptors are calcium ion-permeable nonselective cation channels. *Science* **373**, 420–425.

**Jia A, Huang S, Song W, et al.** 2022. TIR-catalyzed ADP-ribosylation reactions produce signaling molecules for plant immunity. *Science* **377**, eabq8180.

- Jia Y, McAdams SA, Bryan GT, Hershey HP, Valent B.** 2000. Direct interaction of resistance gene and avirulence gene products confers rice blast resistance. *The EMBO journal* **19**, 4004–4014.
- Jones JDG, Vance RE, Dangl JL.** 2016. Intracellular innate immune surveillance devices in plants and animals. *Science* **354**.
- Jorgensen JH.** 1994. Genetics of Powdery Mildew Resistance in Barley. *Critical Reviews in Plant Sciences* **13**, 97–119.
- Jørgensen, J.H.; Hovmøller MStøvring.** 1987. Distribution of Powdery Mildew Resistance and Virulence in Denmark - Research - Aarhus University. Integrated control to reduce damage caused by cereal mildews., 43–47.
- Jubic LM, Saile S, Furzer OJ, el Kasmi F, Dangl JL.** 2019. Help wanted: helper NLRs and plant immune responses. *Current opinion in plant biology* **50**, 82–94.
- de la Concepcion JC, Franceschetti M, Maqbool A, Saitoh H, Terauchi R, Kamoun S, Banfield MJ.** 2018. Polymorphic residues in rice NLRs expand binding and response to effectors of the blast pathogen. *Nature Plants* **4**, 576–585.
- Lapin D, Kovacova V, Sun X, et al.** 2019. A coevolved EDS1-SAG101-NRG1 module mediates cell death signaling by TIR-domain immune receptors. *Plant Cell*.
- Lu XL, Kracher B, Saur IML, Bauer S, Ellwood SR, Wise R, Yaeno T, Maekawa T, Schulze-Lefert P.** 2016. Allelic barley MLA immune receptors recognize sequence-unrelated avirulence effectors of the powdery mildew pathogen. *Proceedings of the National Academy of Sciences USA* **113**, 6486–6495.
- Maekawa T, Cheng W, Spiridon LN, et al.** 2011a. Coiled-coil domain-dependent homodimerization of intracellular barley immune receptors defines a minimal functional module for triggering cell death. *Cell Host and Microbe* **9**, 187–199.
- Maekawa T, Kashkar H, Coll NS.** 2022. Dying in self-defence: a comparative overview of immunogenic cell death signalling in animals and plants. *Cell Death & Differentiation* **Epub ahead**.
- Maekawa T, Kracher B, Saur I, Yoshikawa-Maekawa M, Kellner R, Pankin A, von Korff M, Schulze-Lefert P.** 2019. Subfamily-Specific Specialization of RGH1/MLA Immune Receptors in Wild Barley. *Molecular Plant-Microbe Interactions* **32**, 107–119.
- Maekawa T, Kufer TA, Schulze-Lefert P.** 2011b. NLR functions in plant and animal immune systems: so far and yet so close. *Nature Immunology* **12**, 818–826.
- Mago R, Zhang P, Vautrin S, et al.** 2015. The wheat Sr50 gene reveals rich diversity at a cereal disease resistance locus. *Nature Plants* **1**, 15186.
- Ma S, Lapin D, Liu L, et al.** 2020. Direct pathogen-induced assembly of an NLR immune receptor complex to form a holoenzyme. *Science* **370**, eabe3069.
- Märkle H, Saur IML, Stam R.** 2022. Evolution of resistance (R) gene specificity. *Essays in biochemistry* **66**, 551–560.
- Martin R, Qi T, Zhang H, Liu F, King M, Toth C, Nogales E, Staskawicz BJ.** 2020. Structure of the activated ROQ1 resistosome directly recognizing the pathogen effector XopQ. *Science* **370**, abd9993.
- Moseman JG, Schaller CW.** 1960. Genetics of the allelic aeries at the Mla locus in barley and cultures of *Erysiphe graminis* f. sp. *hordei* that differentiate these alleles. *Phytopathology* **50**, 736–741.

- Nakagawa T, Kurose T, Hino T, Tanaka K, Kawamukai M, Niwa Y, Toyooka K, Matsuoka K, Jinbo T, Kimura T.** 2007. Development of series of gateway binary vectors, pGWBs, for realizing efficient construction of fusion genes for plant transformation. *Journal of Bioscience and Bioengineering* **104**, 34–41.
- Nishimura MT, Anderson RG, Cherkis KA, et al.** 2017. TIR-only protein RBA1 recognizes a pathogen effector to regulate cell death in Arabidopsis. *Proceedings of the National Academy of Sciences USA* **114**, E2053–E2062.
- Ntoukakis V, Balmuth AL, Mucyn TS, Gutierrez JR, Jones AME, Rathjen JP.** 2013. The Tomato Prf Complex Is a Molecular Trap for Bacterial Effectors Based on Pto Transphosphorylation. *PLOS Pathogens* **9**, e1003123.
- Ntoukakis V, Saur IML, Conlan B, Rathjen JP.** 2014. The changing of the guard: the Pto/Prf receptor complex of tomato and pathogen recognition. *Current opinion in plant biology* **20**, 69–74.
- Ortiz D, Chen J, Outram MA, et al.** 2022. The stem rust effector protein AvrSr50 escapes Sr50 recognition by a substitution in a single surface-exposed residue. *New Phytologist* **234**, 592–606.
- Ortiz D, de Guillen K, Cesari S, Chalvon V, Gracy J, Padilla A, Kroj T.** 2017. Recognition of the Magnaporthe oryzae Effector AVR-Pia by the Decoy Domain of the Rice NLR Immune Receptor RGA5. *Plant Cell* **29**, 156–168.
- Paulmurugan R, Umezawa Y, Gambhir SS.** 2002. Noninvasive imaging of protein-protein interactions in living subjects by using reporter protein complementation and reconstitution strategies. *Proceedings of the National Academy of Sciences USA* **99**, 15608–15613.
- Periyannan S, Moore J, Ayliffe M, et al.** 2013. The Gene Sr33, an Ortholog of Barley Mla Genes, Encodes Resistance to Wheat Stem Rust Race Ug99. *Science* **341**, 786–788.
- Rairdan GJ, Moffett P.** 2006. Distinct Domains in the ARC Region of the Potato Resistance Protein Rx Mediate LRR Binding and Inhibition of Activation. *The Plant Cell* **18**, 2082–2093.
- Roberts M, Tang S, Stallmann A, Dangl JL, Bonardi V.** 2013. Genetic Requirements for Signaling from an Autoactive Plant NB-LRR Intracellular Innate Immune Receptor. *PLOS Genetics* **9**, e1003465.
- Rsaliyev A, Pahratdinova Z, Rsaliyev S.** 2017. Characterizing the pathotype structure of barley powdery mildew and effectiveness of resistance genes to this pathogen in Kazakhstan. *BMC Plant Biology* **17**, 178.
- Saile SC, Id PJ, Castel B, et al.** 2020. Two unequally redundant ‘helper’ immune receptor families mediate Arabidopsis thaliana intracellular ‘sensor’ immune receptor functions. *PLOS Biology* **18**, e3000783.
- Saur IML, Bauer S, Kracher B, et al.** 2019a. Multiple pairs of allelic MLA immune receptor-powdery mildew AVRA effectors argue for a direct recognition mechanism. *Elife* **8**, e44471.
- Saur IML, Bauer S, Lu X, Schulze-Lefert P.** 2019b. A cell death assay in barley and wheat protoplasts for identification and validation of matching pathogen AVR effector and plant NLR immune receptors. *Plant Methods* **15**, doi: 10.1186/s13007-019-0502-0.
- Saur IML, Hückelhoven R.** 2021. Recognition and defence of plant-infecting fungal pathogens. *Journal of Plant Physiology* **256**, 153324.
- Saur IML, Panstruga R, Schulze-Lefert P.** 2021. NOD-like receptor-mediated plant immunity: from structure to cell death. *Nature reviews. Immunology* **21**, 305–318.

**Seeholzer S, Tsuchimatsu T, Jordan T, Bieri S, Pajonk S, Yang WX, Jahoor A, Shimizu KK, Keller B, Schulze-Lefert P.** 2010. Diversity at the Mla Powdery Mildew Resistance Locus from Cultivated Barley Reveals Sites of Positive Selection. *Molecular Plant-Microbe Interactions* **23**, 497–509.

**Shao ZQ, Xue JY, Wu P, Zhang YM, Wu Y, Hang YY, Wang B, Chen JQ.** 2016. Large-scale analyses of angiosperm nucleotide-binding site-leucine-rich repeat genes reveal three anciently diverged classes with distinct evolutionary patterns. *Plant Physiology* **170**, 2095–2109.

**Shen QH, Saijo Y, Mauch S, Biskup C, Bieri S, Keller B, Seki H, Ulker B, Somssich IE, Schulze-Lefert P.** 2007. Nuclear activity of MLA immune receptors links isolate-specific and basal disease-resistance responses. *Science* **315**, 1098–1103.

**Shen QH, Zhou FS, Bieri S, Haizel T, Shirasu K, Schulze-Lefert P.** 2003. Recognition specificity and RAR1/SGT1 dependence in barley Mla disease resistance genes to the powdery mildew fungus. *The Plant Cell* **15**, 732–744.

**Slootweg EJ, Spiridon LN, Roosien J, et al.** 2013. Structural determinants at the interface of the ARC2 and leucine-rich repeat domains control the activation of the plant immune receptors Rx1 and Gpa2. *Plant physiology* **162**, 1510–1528.

**Swiderski MR, Birker D, Jones JDG.** 2009. The TIR Domain of TIR-NB-LRR Resistance Proteins Is a Signaling Domain Involved in Cell Death Induction. *Molecular Plant-Microbe Interactions* **22**, 157–165.

**Tamborski J, Seong K, Liu F, Staskawicz B, Krasileva K v.** 2022. Engineering of Sr33 and Sr50 plant immune receptors to alter recognition specificity and autoactivity. *bioRxiv*, 2022.03.05.483131.

**Wan L, Essuman K, Anderson RG, et al.** 2019. TIR domains of plant immune receptors are NAD(+)-cleaving enzymes that promote cell death. *Science* **365**, 799–803.

**Wang JZ, Hu MJ, Wang J, Qi JF, Han ZF, Wang GX, Qi YJ, Wang HW, Zhou JM, Chai JJ.** 2019a. Reconstitution and structure of a plant NLR resistosome conferring immunity. *Science* **364**, eaav5870.

**Wang JZ, Wang J, Hu MJ, et al.** 2019b. Ligand-triggered allosteric ADP release primes a plant NLR complex. *Science* **364**, eaav5868.

**Williams SJ, Sohn KH, Wan L, et al.** 2014. Structural Basis for Assembly and Function of a Heterodimeric Plant Immune Receptor. *Science* **344**, 299–303.

**Yu D, Song W, Tan EYJ, et al.** 2022. TIR domains of plant immune receptors are 2',3'-cAMP/cGMP synthetases mediating cell death. *Cell* **185**, 2370-2386.e18.

**Zhang TT, Lei J, Yang HJ, Xu K, Wang R, Zhang ZY.** 2011. An improved method for whole protein extraction from yeast *Saccharomyces cerevisiae*. *Yeast* **28**, 795–798.

**Zhao YB, Liu MX, Chen TT, et al.** 2022. Pathogen effector AvrSr35 triggers Sr35 resistosome assembly via a direct recognition mechanism. *Science Advances* **8**, 5108.

## Figures

### Fig. 1: The C-terminus of AVR<sub>A13</sub> effectors controls interaction with and activation of MLA13. (A)

Amino acid (aa) alignment of AVR<sub>A13</sub> variants analysed for interaction with MLA13 and inhibition of MLA13-mediated cell death. Signal peptide (SP) residues are underlined; aa in pink and blue highlight the aa variation between AVR<sub>A13</sub>-V2 and AVR<sub>A13</sub>-1, respectively. (B, C) *Nicotiana benthamiana* leaves were transformed transiently with 35S:*Mla13-4Myc* (pGWB517) with one of the AVR<sub>A13</sub> variants lacking SPs cloned between the 35S promoter and a C-terminal *mYFP* sequence or *empty vector* (EV). (B) Cell death was determined three days post transformation and figures shown are representatives of at least nine independent leaves from at least three independent plants. (C) Protein stability of the AVR<sub>A13</sub> variants fused to mYFP corresponding to constructs of B. Leaf tissue was harvested two days post infiltration. Total protein was extracted, separated by gel electrophoresis and probed by anti-GFP western blotting (WB). (D, E) Yeast cells were co-transformed with *Mla13* fused N-terminally to the *LexA* binding domain sequence (BD) and AVR<sub>A13</sub> variants lacking SPs fused N-terminally to the *B42* activation domain (AD) and 1xHA tag sequence as indicated. Growth of transformants was determined on selective growth media containing raffinose and galactose as carbon sources but lacking uracil, histidine and tryptophan (-UHW), and interaction of proteins was determined by leucine reporter activity reflected by growth of yeast on selective media containing raffinose and galactose as carbon sources but lacking uracil, histidine, tryptophan and leucine (-UHWL). Figures shown are representatives of at least three experiments and pictures were taken 6 to 8 days after drop out. (E) Protein levels of BD-MLA13 and AD-AVR<sub>A</sub> variants corresponding to yeast of D. Yeast transformants were grown in raffinose and galactose containing selective media lacking uracil, tryptophan, and histidine to OD<sub>600</sub> = 1. Then, cells were harvested, total protein extracted, separated by gel electrophoresis, and western blots (WB) were probed with anti-LexA or anti-HA antibodies as indicated. CBB: Coomassie brilliant blue. (F) Cartoon and surface representations for the top rank model of AVR<sub>A13</sub>-1 and AVR<sub>A13</sub>-V2 from AlphaFold2 (pLDDT<sub>overall</sub> = 89, pLDDT<sub>L/5119</sub> >80). Residues



highlighted in pink correspond to the AVR<sub>A13</sub>-1 C-terminal residues and those in blue correspond to the AVR<sub>A13</sub>-V2 C-terminal residues.

**Fig. 2: AVR<sub>A13</sub>-V2 can act as dominant-negative effector on MLA13.** *Nicotiana benthamiana* leaves were co-transformed transiently with cDNAs of *Mla1* or *Mla7* or *MLA13* (pGWB vectors) with AVR<sub>a1</sub> or AVR<sub>a7</sub>-2 or AVR<sub>a13</sub> or empty vector (EV) as indicated and either AVR<sub>a13</sub>-V1 or AVR<sub>A13</sub>-V2 or EV fused to epitope tags as indicated. All constructs were expressed from the 35S promoter. **(A, B)** Cell death was determined three to four days post transformation and **(B)** scored from 0 to 3 based on the cell death scale indicated. All values obtained in at least three independent experiments are indicated by dots, error bars = standard error. Differences between samples were assessed by non-parametric Kruskal-Wallis and subsequent Dunn's tests for each MLA variant. Calculated *P* values were as follows: *Mla1*: *p*=0.824, *Mla7*: *p*=0.551 and *Mla13*: *p*=1.00E-06. Samples marked by identical letters in the plots do not differ significantly (*p*<0.05) in the Tukey test for the corresponding MLA. **(C)** Protein levels corresponding to samples of B. Leaf tissue was harvested two days post infiltration. Total protein was extracted and recovered by GFP-Trap (AVR<sub>a1</sub> and AVR<sub>a7</sub>-2) separated by gel electrophoresis and probed by anti-HA (MLAs), anti-Myc (AVR<sub>A13</sub>-V2-4xMyc) or anti-GFP (AVR<sub>A1</sub>-mYFP, AVR<sub>A7</sub>-2-mYFP and AVR<sub>A13</sub>-1-mYFP) western blotting (WB) as indicated. CBB: Coomassie brilliant blue.

**Fig. 3: Amino acid exchanges in the nucleotide-binding site of MLA13 compromise AVR<sub>A13</sub> effector binding.** **(A, B)** Yeast cells were co-transformed with *Mla13* wt or mutant variants *Mla13*<sup>D502V</sup> (MHD) or *Mla13* K207R (P-loop) fused N-terminally to the LexA binding domain sequence (BD) and AVR<sub>a13</sub> variants lacking SPs fused N-terminally to the B42 activation domain (AD) and 1xHA tag sequence as indicated. **(A)** Growth of transformants was determined on selective growth media containing raffinose and galactose as carbon sources but lacking uracil, histidine and tryptophan (-UHW), and interaction of proteins was determined by leucine reporter activity reflected by growth of yeast on selective media containing raffinose and galactose as carbon sources, but lacking uracil,



histidine, tryptophan and leucine (-UHWL). Figures shown are representatives of at least three experiments and pictures were taken 6 to 8 days after drop out. **(B)** Protein levels of BD-MLA13 variants and AD-AVR<sub>A</sub> variants corresponding to yeast of A. Yeast transformants were grown in raffinose and galactose containing selective media lacking uracil, tryptophan, and histidine to OD<sub>600</sub> = 1. Cells were harvested, total protein extracted, separated by gel electrophoresis, and western blots (WB) were probed with anti-LexA or anti-HA antibodies as indicated. **(C, D)** *Nicotiana benthamiana* leaves were co-transformed transiently with cDNAs of AVR<sub>a13</sub>-V1 or AVR<sub>a13</sub>-V2 or empty vector (EV) together with constructs encoding either MLA13 or MLA13<sup>D502V</sup> (pAM-PAT vector) as indicated and under the control of the 35S promoter sequence at a 2:1 ratio. **(C)** Cell death was determined two (MLA13 MHD) to five days (MLA13) post transformation and scored from 0 to 3 based on the cell death scale indicated. All values obtained in at least three independent experiments are indicated by dots, error bars = standard deviation. Differences between samples were assessed by non-parametric Kruskal-Wallis and subsequent Dunn's tests for each MLA variant. Calculated *P* values were as follows: MLA13: *p*=5E-05, MLA13 MHD: *p*=0.078. Samples marked by identical letters in the plots did not differ significantly (*p*<0.05) in the Tukey test for the corresponding MLA. **(D)** Protein levels corresponding to samples of C. Leaf tissue was harvested 36 hours post infiltration. Total protein was extracted, separated by gel electrophoresis and probed by anti-Myc (MLAs) or anti-GFP (AVR<sub>A13</sub>-V2) western blotting (WB) as indicated. CBB: Coomassie brilliant blue.

**Fig. 4: Amino acid (aa) exchanges in the coiled-coil (CC) domain de-regulate MLA13 auto-inhibition.**

**(A)** Amino acid (aa) changes in MLA13 mutant variants. The D2A\_E17A and the F99E variants encode changes in the MLA13 coiled-coil (CC) domain, which spans from aa1 to 160. The K207R, D284A, D502V and H501G variants encode changes in the nucleotide-binding site (NB, aa 161 to 549). The S902F\_F935I variants affects the leucine-rich repeats (LRR, aa 550 to 942) which are followed by a short C-terminal amino acids sequence. **(B, C)** *Nicotiana benthamiana* leaves were transformed transiently with cDNAs of one of the *Mla13* variants as indicated (pGWB517 vector) either with or

without  $AVR_{a13}$ -1 lacking SPs and fused c-terminally to a *mYFP* sequence. All constructs are under the control of the 35S promoter. **(B)** Cell death was determined three days post transformation;  $n \geq 9$ . **(C)** Protein stability of the MLA variants fused to 4xMyc corresponding to constructs of B. Leaf tissue was harvested two days post infiltration. Total protein was extracted, separated by gel electrophoresis and probed by anti-Myc western blotting (WB) as indicated. **(D, E)** Yeast cells were co-transformed with *Mla13* variants fused N-terminally to the *LexA* binding domain (BD) sequence and  $AVR_{a13}$ -V2 lacking SPs fused N-terminally to the *B42* activation domain (AD) and *1xHA* tag sequence as indicated. Growth of transformants was determined on selective growth media containing raffinose and galactose as carbon sources but lacking uracil, histidine and tryptophan (-UHW), and interaction of proteins was determined by leucine reporter activity reflected by growth of yeast on selective media containing raffinose and galactose as carbon sources but lacking uracil, histidine, tryptophan and leucine (-UHWL). Figures shown are representatives of at least three experiments and pictures were taken 6 to 8 days after drop out. **(E)** Protein levels of BD-MLA13 variants and AD- $AVR_{a13}$ -V2 corresponding to yeast of D. Yeast transformants were grown in raffinose and galactose containing selective media lacking uracil, tryptophan, and histidine to  $OD_{600} = 1$ . Then, cells were harvested, total protein extracted, separated by gel electrophoresis, and western blots (WB) were probed with anti-LexA or anti-HA antibodies as indicated. CBB: Coomassie brilliant blue. **(F)** *N. benthamiana* leaves were co-transformed transiently with cDNAs of  $AVR_{a13}$ -V1,  $AVR_{a13}$ -V2 or *empty vector* (EV) together with constructs encoding the MLA13 variant as indicated and under the control of the 35S promoter sequence at a 2:1 ratio. Cell death was determined three days post transformation and scored from 0 to 3 based on the cell death scale indicated. All values obtained in at least two independent experiments are indicated by dots, error bars = standard deviation. Differences between samples were assessed by non-parametric Kruskal-Wallis and subsequent Dunn's tests for each MLA variant. Calculated *P* values were as follows: MLA13:  $p = 9.38E-07$ , MLA13<sup>D2A\_E17A</sup>:  $p = 0.77$ . n.s. = no significant difference.

**Fig. 5: Calcium channel activity is required for *Mla13*-mediated cell death in barley (A)** Barley protoplasts of lines CI 16155 (cultivar Manchuria *Mla13*) and CI2330 (Manchuria) were transfected with *pUBQ:luciferase* and piPKb002 containing *AVR<sub>a13</sub>-1* cDNA without signal peptide or a piPKb002 empty vector control and recovered in the presence of  $\text{LaCl}_3$  at concentrations indicated. Luciferase activity was determined 16 hr post transfection/addition of  $\text{LaCl}_3$  as a proxy for cell death and normalized against the respective *EV* sample. Error bars = standard deviation. Differences between samples were assessed using non-parametric Kruskal-Wallis and subsequent Dunn's post hoc tests.  $p=6.179\text{e-}10$ . Samples marked by identical letters in the plot did not differ significantly ( $p<0.05$ ) in Dunn's test. **(B)** Protoplasts derived from cultivar Manchuria CI2330 leaves transfected with *pZmUBQ:AVR<sub>a13</sub>-1-mYFP* were harvested 16h post transfection/ $\text{LaCl}_3$  treatment. Total protein was extracted, separated by gel electrophoresis, and western blots (WB) were probed with anti-GFP antibodies. CBB: Coomassie brilliant blue.

**Figure S1: (A)** *Nicotiana benthamiana* leaves were transformed transiently with cDNAs of the *Mla13* together with *empty vector (EV)* or *AVR<sub>a13</sub>-1* lacking SPs and fused c-terminally to *BirA-4Myc* tag sequence and expressed from the 35S promotor. Cell death was determined three days post transformation and picture shows representative of at least three independent leaves. **(B)** *N. benthamiana* leaves were transformed transiently with cDNAs of *Mla1* or *Mla7* or *MLA13* fused C-terminally to a *4xMyc* sequence and at 24 h before re-transformation with cDNAs encoding *AVR<sub>a13</sub>-1-BirA-4xMyc*, *AVR<sub>a13</sub>-V1-BirA-4xMyc*, *AVR<sub>a13</sub>-V2-BirA-4xMyc* or *empty vector (EV)* as indicated. All leaves were treated with 10  $\mu\text{M}$  biotin by infiltration at 24h after the second transformation. Leaf tissue was harvested 24h post biotin treatment. Total protein was extracted under denaturing conditions and recovered by Strep IP, separated by gel electrophoresis and probed by anti-Myc western blotting (WB). CBB: Coomassie brilliant blue.

**Fig. S2: Specificity control to Figure 1D. (A,B)** Yeast cells were co-transformed with *Mla1* fused N-terminally to the *LexA* binding domain sequence (BD) and  $AVR_{o13}$  variants lacking SPs fused N-terminally to the *B42* activation domain (AD) and 1xHA tag sequence as indicated. Growth of transformants was determined on selective growth media containing raffinose and galactose as carbon sources but lacking uracil, histidine and tryptophan (-UHW), and interaction of proteins was determined by leucine reporter activity reflected by growth of yeast on selective media containing raffinose and galactose as carbon sources but lacking uracil, histidine, tryptophan and leucine (-UHWL). Figures shown are representatives of at least three experiments and pictures were taken 6 to 8 days after drop out. (B) Protein levels of BD-MLA1 and AD- $AVR_A$  variants corresponding to yeast of D. Yeast transformants were grown in raffinose and galactose containing selective media lacking uracil, tryptophan, and histidine to  $OD_{600} = 1$ . Then, cells were harvested, total protein extracted, separated by gel electrophoresis, and western blots (WB) were probed with anti-LexA or anti-HA antibodies as indicated. CBB: Coomassie brilliant blue.

**Fig. S3: (A, B)** *Nicotiana benthamiana* leaves were co-transformed transiently with *empty vector* (EV) or constructs encoding either MLA13,  $MLA13^{K207D}$  or  $MLA13^{D502V}$  (pGWB) as indicated with (A) or without (B) cDNA encoding of  $AVR_{o13}-1$  or EV. All cDNAs were under the control of the 35S promoter sequence. Cell death was determined three days post transformation. **(C, D)** Yeast cells were co-transformed with Sr50 or  $Sr50^{D498V}$  (MHD) fused N-terminally to the *LexA* binding domain sequence (BD) and *AvrSr50* variants lacking SPs fused N-terminally to the *B42* activation domain (AD) and 1xHA tag sequence as indicated. Growth of transformants was determined on selective growth media containing raffinose and galactose as carbon sources but lacking uracil, histidine and tryptophan (-UHW), and interaction of proteins was determined by leucine reporter activity reflected by growth of yeast on selective media containing raffinose and galactose as carbon sources but lacking uracil, histidine, tryptophan and leucine (-UHWL). Figures shown are representatives of at least three experiments and pictures were taken 12 to 14 days after drop out. (B) Protein levels of BD-Sr50 and

AD-AvrSr50 variants corresponding to yeast of *C. Yeast* transformants were grown in raffinose and galactose containing selective media lacking uracil, tryptophan, and histidine to  $OD_{600} = 1$ . Then, cells were harvested, total protein extracted, separated by gel electrophoresis, and western blots (WB) were probed with anti-LexA or anti-HA antibodies as indicated. **(E)** *Nicotiana benthamiana* leaves were co-transformed transiently with cDNAs of  $AVR_{o13}$ -V1 or  $AVR_{o13}$ -V2 or empty vector (EV) together with constructs encoding the MLA13 coiled-coil (CC) domain (amino acids (aa) 1-160). **(E)** Cell death was determined two days post transformation and scored from 0 to 3 based on the cell death scale indicated. All values obtained in at least three independent experiments are indicated by dots, error bars = standard error. Differences between samples were assessed by the non-parametric Kruskal-Wallis test.  $p = 0.623871$ ; n.s. = not significant. **(F)** Protein levels corresponding to samples of *C. Leaf* tissue was harvested 36 hours post infiltration. Total protein was extracted, separated by gel electrophoresis and probed by anti-Myc (MLA13\_CC) or anti-GFP ( $AVR_{A13}$ -V2) western blotting as indicated. CBB: Coomassie brilliant blue.

**Fig. S4:** Schematic models of monomeric and oligomeric MLA13 wild-type,  $MLA13^{P-loop}$ ,  $MLA13^{MHD}$  and  $MLA13^{D2A_E17A}$  conformations with indication of putative effector (purple) entry sites and binding of ADP (green) or ATP (blue).

**Fig. S5:** Schematic models of MLA13 during the multistep process of putative resistosome formation initiated by the interaction with *Bgh*  $AVR_{A13}$ -1 (A) and putative models for the inhibition of the activation process by  $AVR_{A13}$ -V2 (B). **(A)**  $AVR_{A13}$ -1 binding to the effector entry point involving the MLA13 Leucine-rich-repeats (LRR) domain leads to a steric clash and subsequent replacement of adenosine diphosphate (ADP) by adenosine triphosphate (ATP) in the nucleotide-binding (NB) pocket of the MLA13. ATP-binding causes additional structural rearrangement of the N-terminal Coiled-coil (CC) domain releasing the  $\alpha$ 1-helix. In the resulting putative pentameric wheel-like MLA13

resistosome, the  $\alpha$ 1-helices are thought to form a funnel like structure. **(B)** AVR<sub>A13</sub>-V2 binding is likely either incapable to inducing a steric clash or prevents subsequent release of the  $\alpha$ 1-helix.



# Figure 1

**A**

|                                       |                                                                      |                              |                                            |
|---------------------------------------|----------------------------------------------------------------------|------------------------------|--------------------------------------------|
|                                       | aa 1                                                                 | 60                           | 122                                        |
| AVR <sub>A13</sub> -1                 | <u>M</u> KTFQFASIVAGLSFLKTTIAAGDGYITLGMGSIHKNDIYRVAEHMWTIDAYSVPSNNHG | SYPIFGEEINGSVTRIFPIVYNGDDWRS | GFYYSVESTEDLSYIKLRYNGARYE <u>TCMVSSPE</u>  |
| AVR <sub>A13</sub> -V2                | <u>M</u> KTFQFASIVAGLSFLKTTIAAGDGYITLGMGSIHKNDIYRVAEHMWTIDAYSVPSNNHG | SYPIFGEEINGSVTRIFPIVYNGDDWRS | GFYYSVESTEDLSYIKLRYNGARYE <u>VRATL</u> --- |
| AVR <sub>A13</sub> -V1                | <u>M</u> KTFQFASIVAGLSFLKTTIAAGDGYITLGMGSIHKNDIYRVAEHMWTIDAYSVPSNNHG | SYPIFGEEINGSVTRIFPIV         | -----                                      |
| AVR <sub>A13</sub> -1 <sup>ΔSPE</sup> | <u>M</u> KTFQFASIVAGLSFLKTTIAAGDGYITLGMGSIHKNDIYRVAEHMWTIDAYSVPSNNHG | SYPIFGEEINGSVTRIFPIVYNGDDWRS | GFYYSVESTEDLSYIKLRYNGARYE <u>TCMV</u> ---  |
| AVR <sub>A13</sub> <sup>TCMVL</sup>   | <u>M</u> KTFQFASIVAGLSFLKTTIAAGDGYITLGMGSIHKNDIYRVAEHMWTIDAYSVPSNNHG | SYPIFGEEINGSVTRIFPIVYNGDDWRS | GFYYSVESTEDLSYIKLRYNGARYE <u>TCMVL</u> --- |
| AVR <sub>A13</sub> <sup>TCMTL</sup>   | <u>M</u> KTFQFASIVAGLSFLKTTIAAGDGYITLGMGSIHKNDIYRVAEHMWTIDAYSVPSNNHG | SYPIFGEEINGSVTRIFPIVYNGDDWRS | GFYYSVESTEDLSYIKLRYNGARYE <u>TCMTL</u> --- |
| AVR <sub>A13</sub> <sup>TCATL</sup>   | <u>M</u> KTFQFASIVAGLSFLKTTIAAGDGYITLGMGSIHKNDIYRVAEHMWTIDAYSVPSNNHG | SYPIFGEEINGSVTRIFPIVYNGDDWRS | GFYYSVESTEDLSYIKLRYNGARYE <u>TCATL</u> --- |
| AVR <sub>A13</sub> <sup>TRATL</sup>   | <u>M</u> KTFQFASIVAGLSFLKTTIAAGDGYITLGMGSIHKNDIYRVAEHMWTIDAYSVPSNNHG | SYPIFGEEINGSVTRIFPIVYNGDDWRS | GFYYSVESTEDLSYIKLRYNGARYE <u>TRATL</u> --- |

**B**

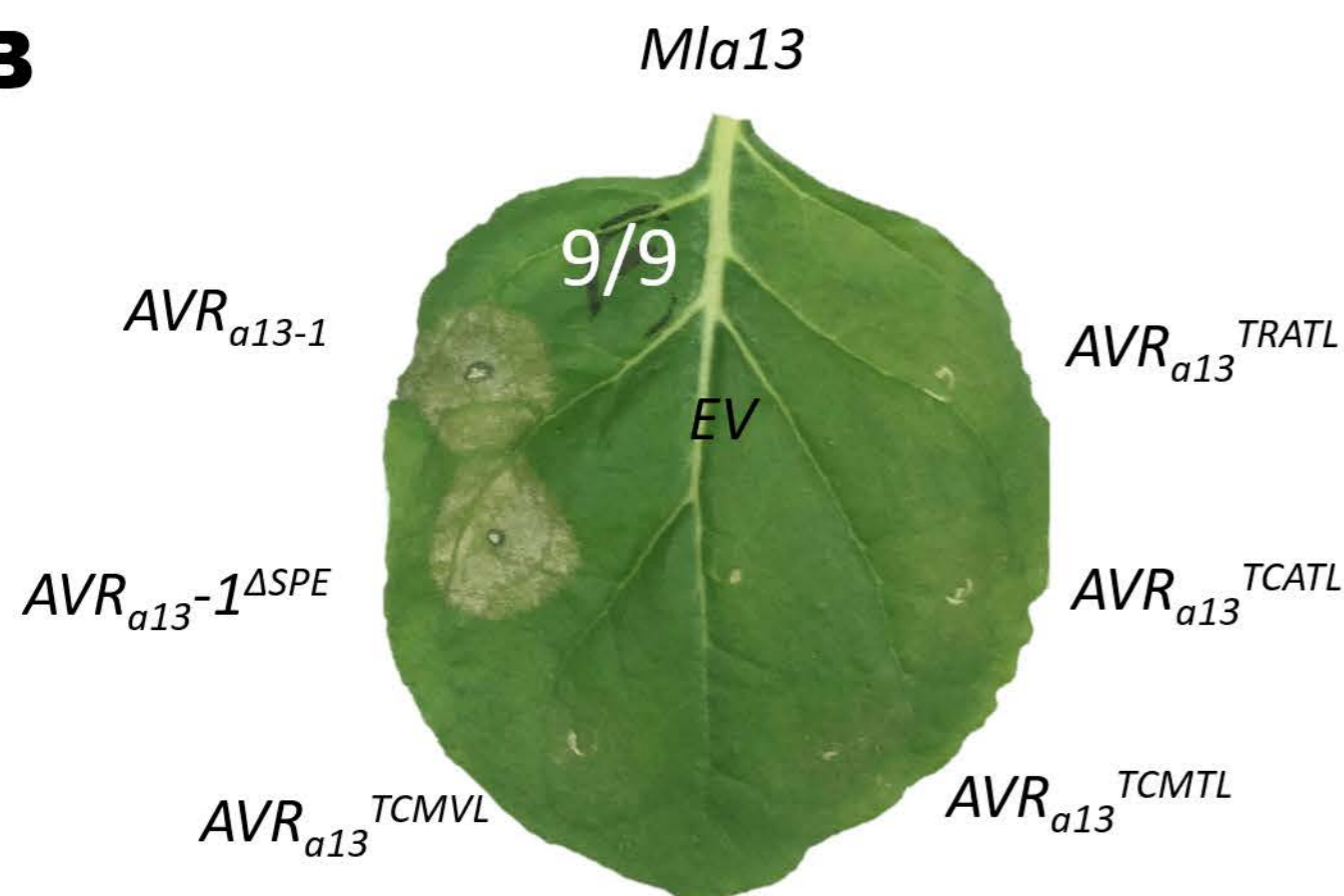

**C**

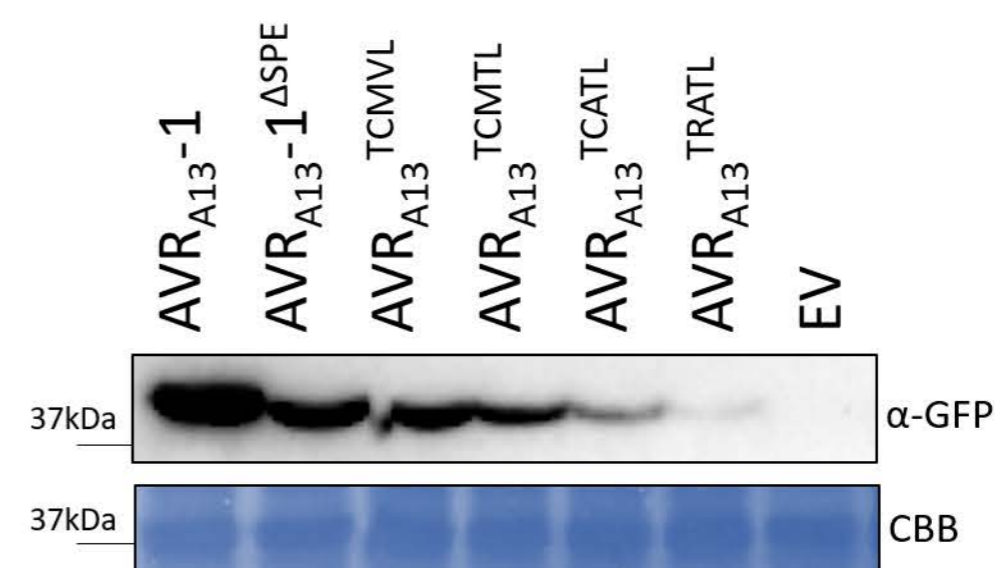

**D**

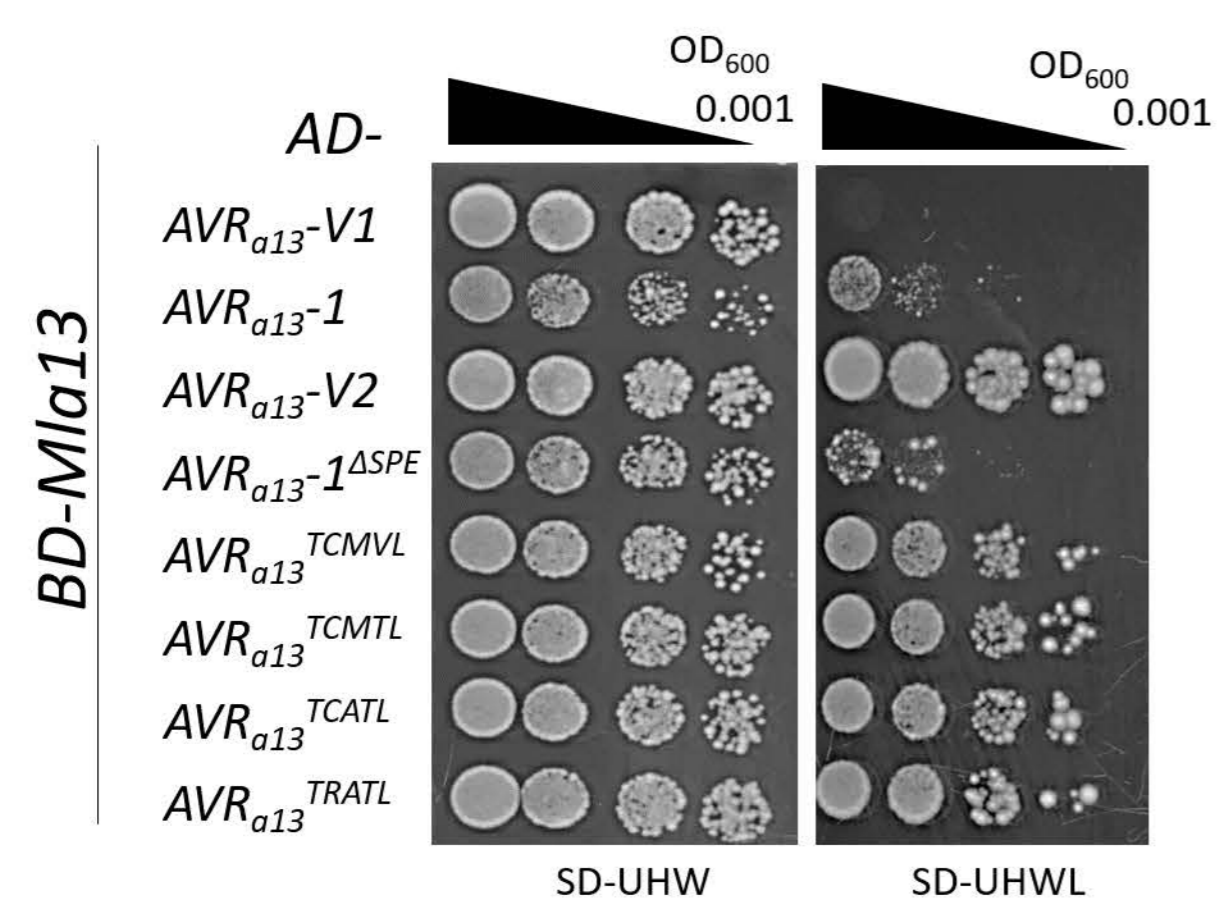

**E**

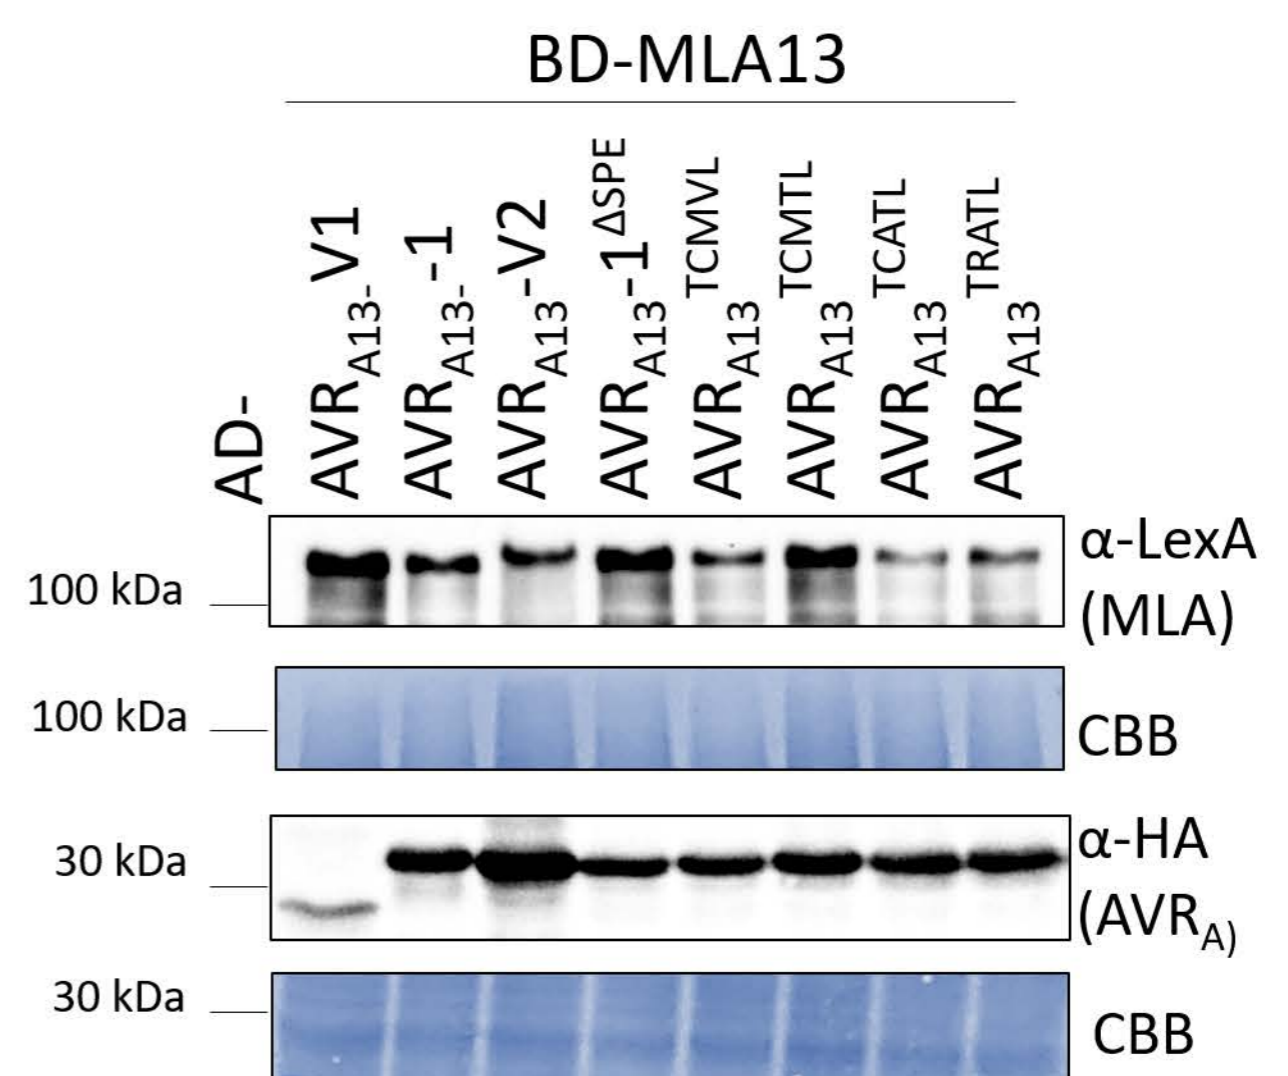

**F**

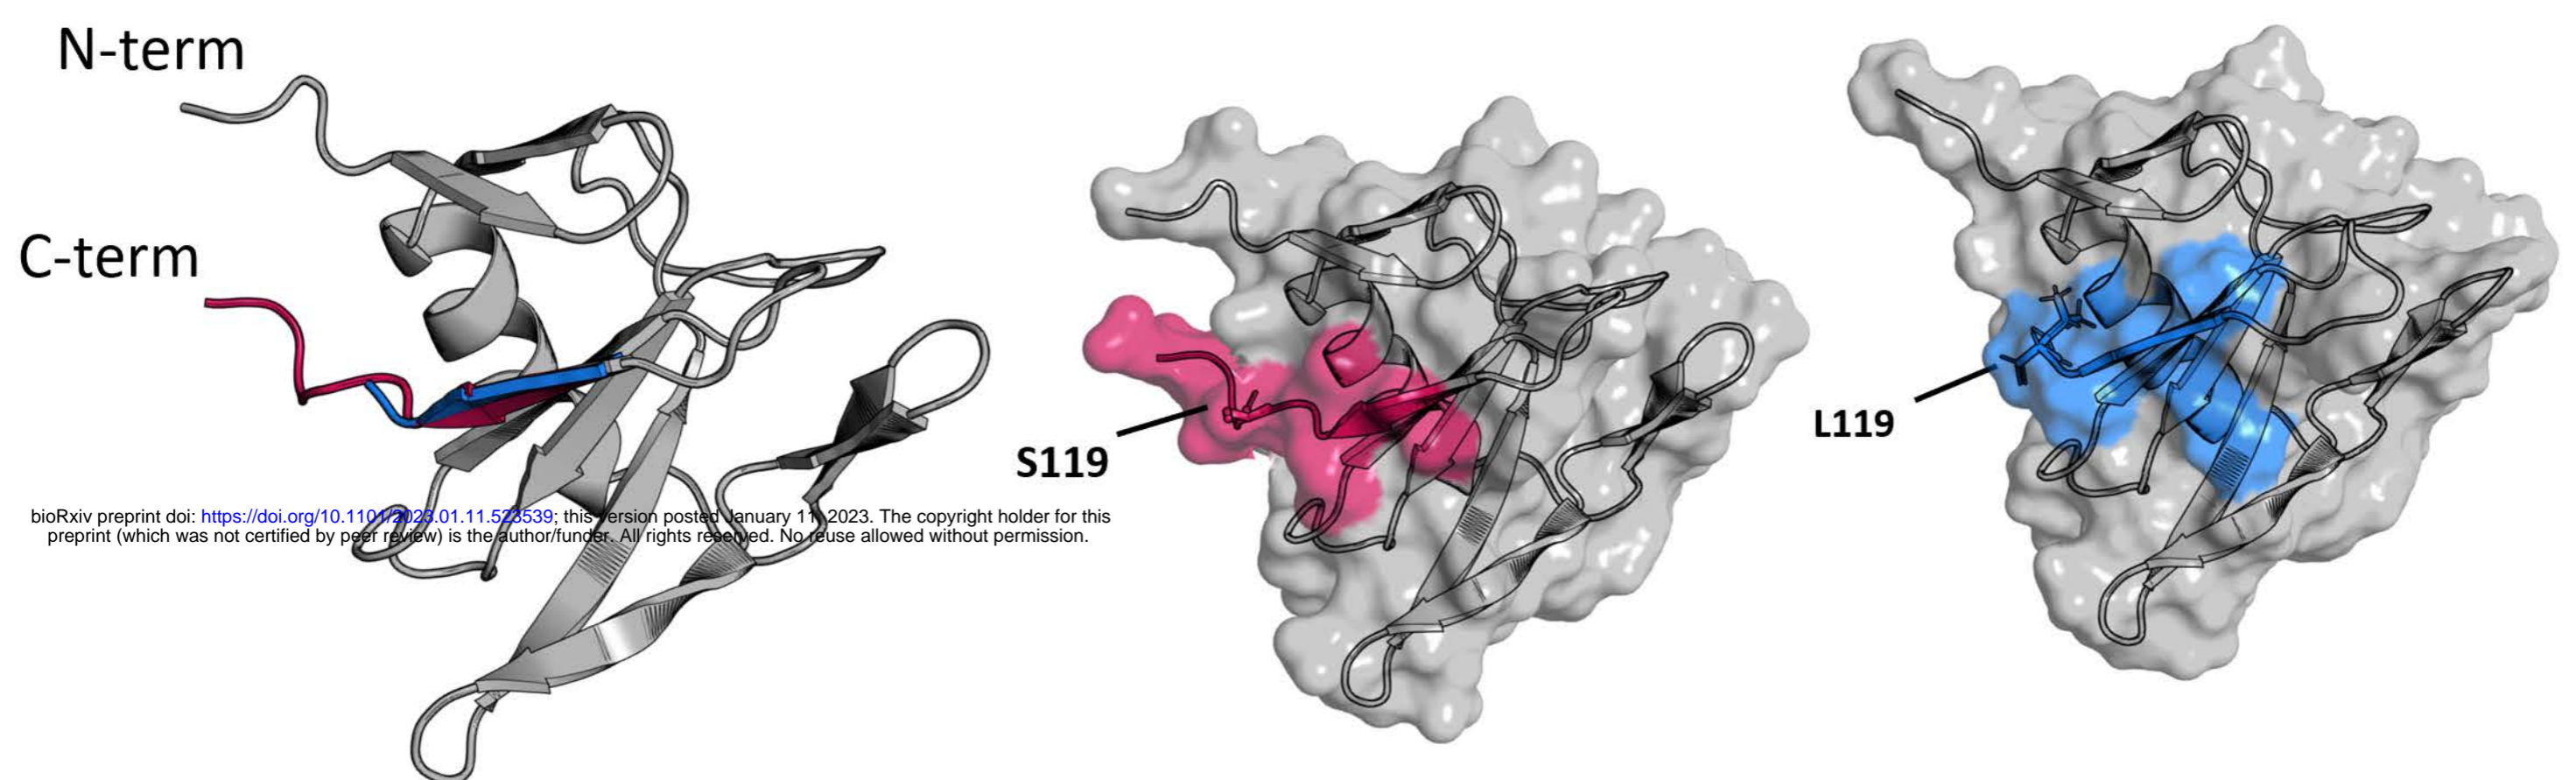

**Fig. 1: The C-terminus of AVR<sub>A13</sub> effectors controls interaction with and activation of MLA13.** (A) Amino acid (aa) alignment of AVR<sub>A13</sub> variants analysed for interaction with MLA13 and inhibition of MLA13-mediated cell death. Signal peptide (SP) residues are underlined; aa in pink and blue highlight the aa variation between AVR<sub>A13</sub>-V2 and AVR<sub>A13</sub>-1, respectively. (B, C) *Nicotiana benthamiana* leaves were transformed transiently with 35S:*Mla13*-4Myc (pGWB517) with one of the AVR<sub>A13</sub> variants lacking SPs cloned between the 35S promoter and a C-terminal *mYFP* sequence or empty vector (EV). (B) Cell death was determined three days post transformation and figures shown are representatives of at least nine independent leaves from at least three independent plants. (C) Protein stability of the AVR<sub>A13</sub> variants fused to mYFP corresponding to constructs of B. Leaf tissue was harvested two days post infiltration. Total protein was extracted, separated by gel electrophoresis and probed by anti-GFP western blotting (WB). (D, E) Yeast cells were co-transformed with *Mla13* fused N-terminally to the *LexA* binding domain sequence (BD) and AVR<sub>A13</sub> variants lacking SPs fused N-terminally to the *B42* activation domain (AD) and 1xHA tag sequence as indicated. Growth of transformants was determined on selective growth media containing raffinose and galactose as carbon sources but lacking uracil, histidine and tryptophan (-UHW), and interaction of proteins was determined by leucine reporter activity reflected by growth of yeast on selective media containing raffinose and galactose as carbon sources but lacking uracil, histidine, tryptophan and leucine (-UHWL). Figures shown are representatives of at least three experiments and pictures were taken 6 to 8 days after drop out. (E) Protein levels of BD-MLA13 and AD-AVR<sub>A</sub> variants corresponding to yeast of D. Yeast transformants were grown in raffinose and galactose containing selective media lacking uracil, tryptophan, and histidine to OD<sub>600</sub> = 1. Then, cells were harvested, total protein extracted, separated by gel electrophoresis, and western blots (WB) were probed with anti-LexA or anti-HA antibodies as indicated. CBB: Coomassie brilliant blue. (F) Cartoon and surface representations for the top rank model of AVR<sub>A13</sub>-1 and AVR<sub>A13</sub>-V2 from AlphaFold2 (pLDDT<sub>overall</sub> = 89, pLDDT<sub>L/S119</sub> >80). Residues highlighted in pink correspond to the AVR<sub>A13</sub>-1 C-terminal residues and those in blue correspond to the AVR<sub>A13</sub>-V2 C-terminal residues.



## Figure 2

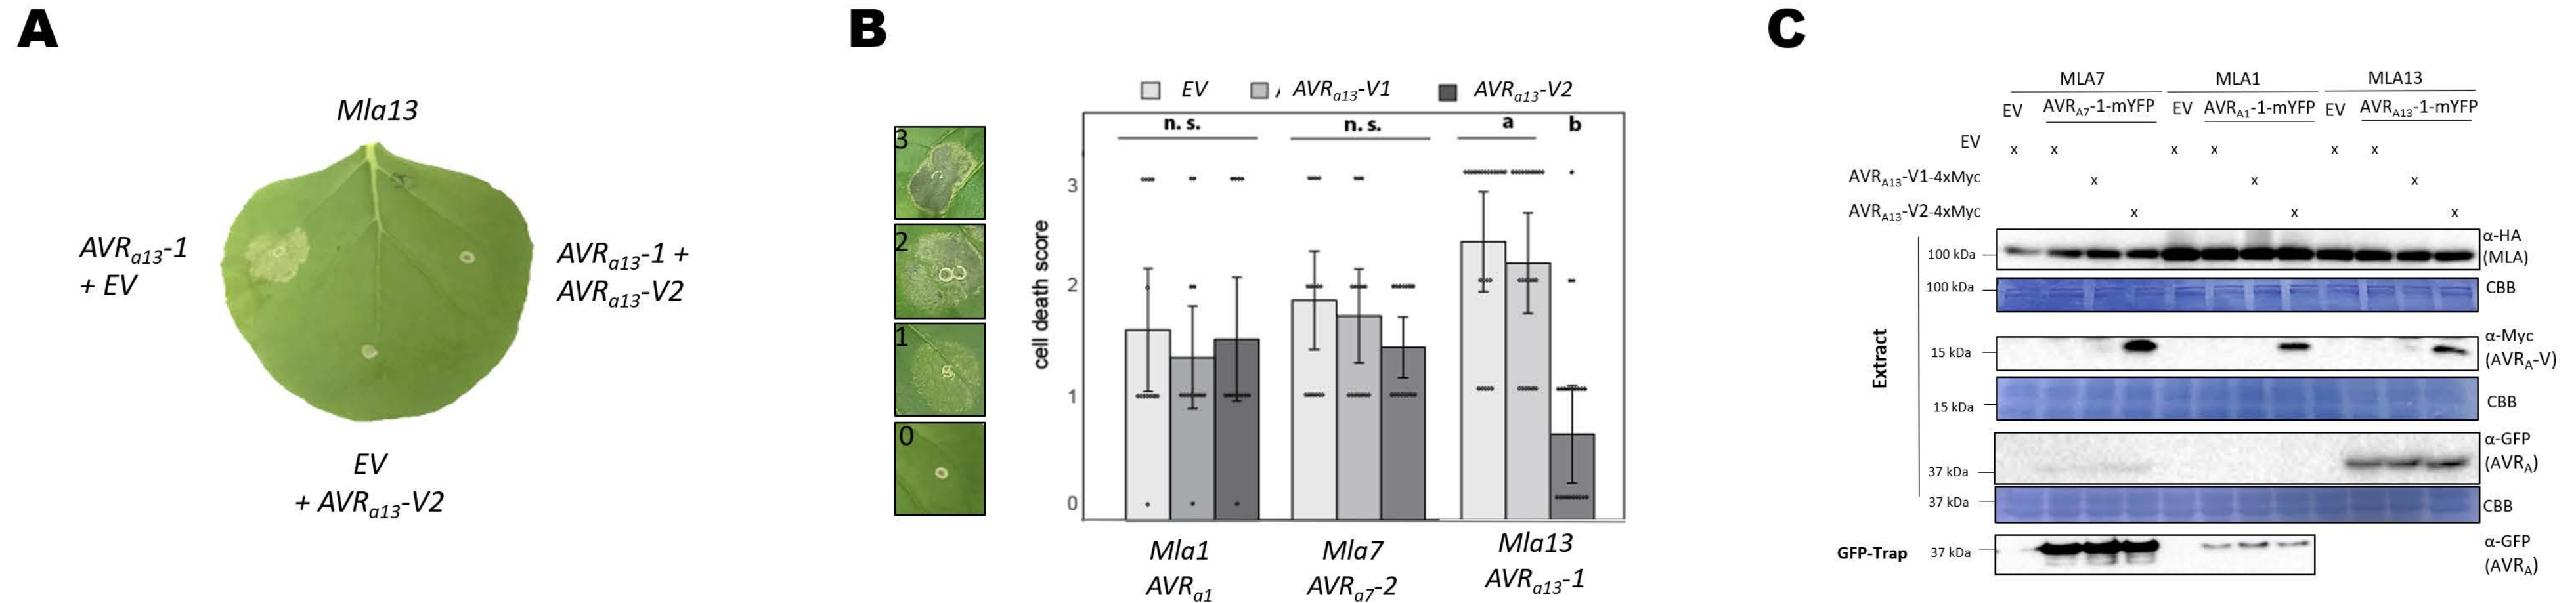

**Fig. 2: AVR<sub>A13</sub>-V2 can act as dominant-negative effector on MLA13.** *Nicotiana benthamiana* leaves were co-transformed transiently with cDNAs of *Mla1* or *Mla7* or *MLA13* (pGWB vectors) with *AVR<sub>a1</sub>* or *AVR<sub>a7-2</sub>* or *AVR<sub>a13</sub>* or empty vector (*EV*) as indicated and either *AVR<sub>a13</sub>-V1* or *AVR<sub>A13</sub>-V2* or *EV* fused to epitope tags as indicated. All constructs were expressed from the 35S promoter. **(A, B)** Cell death was determined three to four days post transformation and **(B)** scored from 0 to 3 based on the cell death scale indicated. All values obtained in at least three independent experiments are indicated by dots, error bars = standard error. Differences between samples were assessed by non-parametric Kruskal-Wallis and subsequent Dunn tests for each MLA variant. Calculated *P* values were as follows: *Mla1*: *p*=0.824, *Mla7*: *p*=0.551 and *Mla13*: *p*=1.00E-06. Samples marked by identical letters in the plots do not differ significantly (*p*<0.05) in the Tukey test for the corresponding MLA. **(C)** Protein levels corresponding to samples of B. Leaf tissue was harvested two days post infiltration. Total protein was extracted and recovered by GFP-Trap (*AVR<sub>a1</sub>* and *AVR<sub>a7-2</sub>*) separated by gel electrophoresis and probed by anti-HA (MLAs), anti-Myc (*AVR<sub>A13</sub>-V2-4xMyc*) or anti-GFP (*AVR<sub>A1</sub>-mYFP*, *AVR<sub>A7-2</sub>-mYFP* and *AVR<sub>A13-1</sub>-mYFP*) western blotting (WB) as indicated. CBB: Coomassie brilliant blue.



## Figure 3

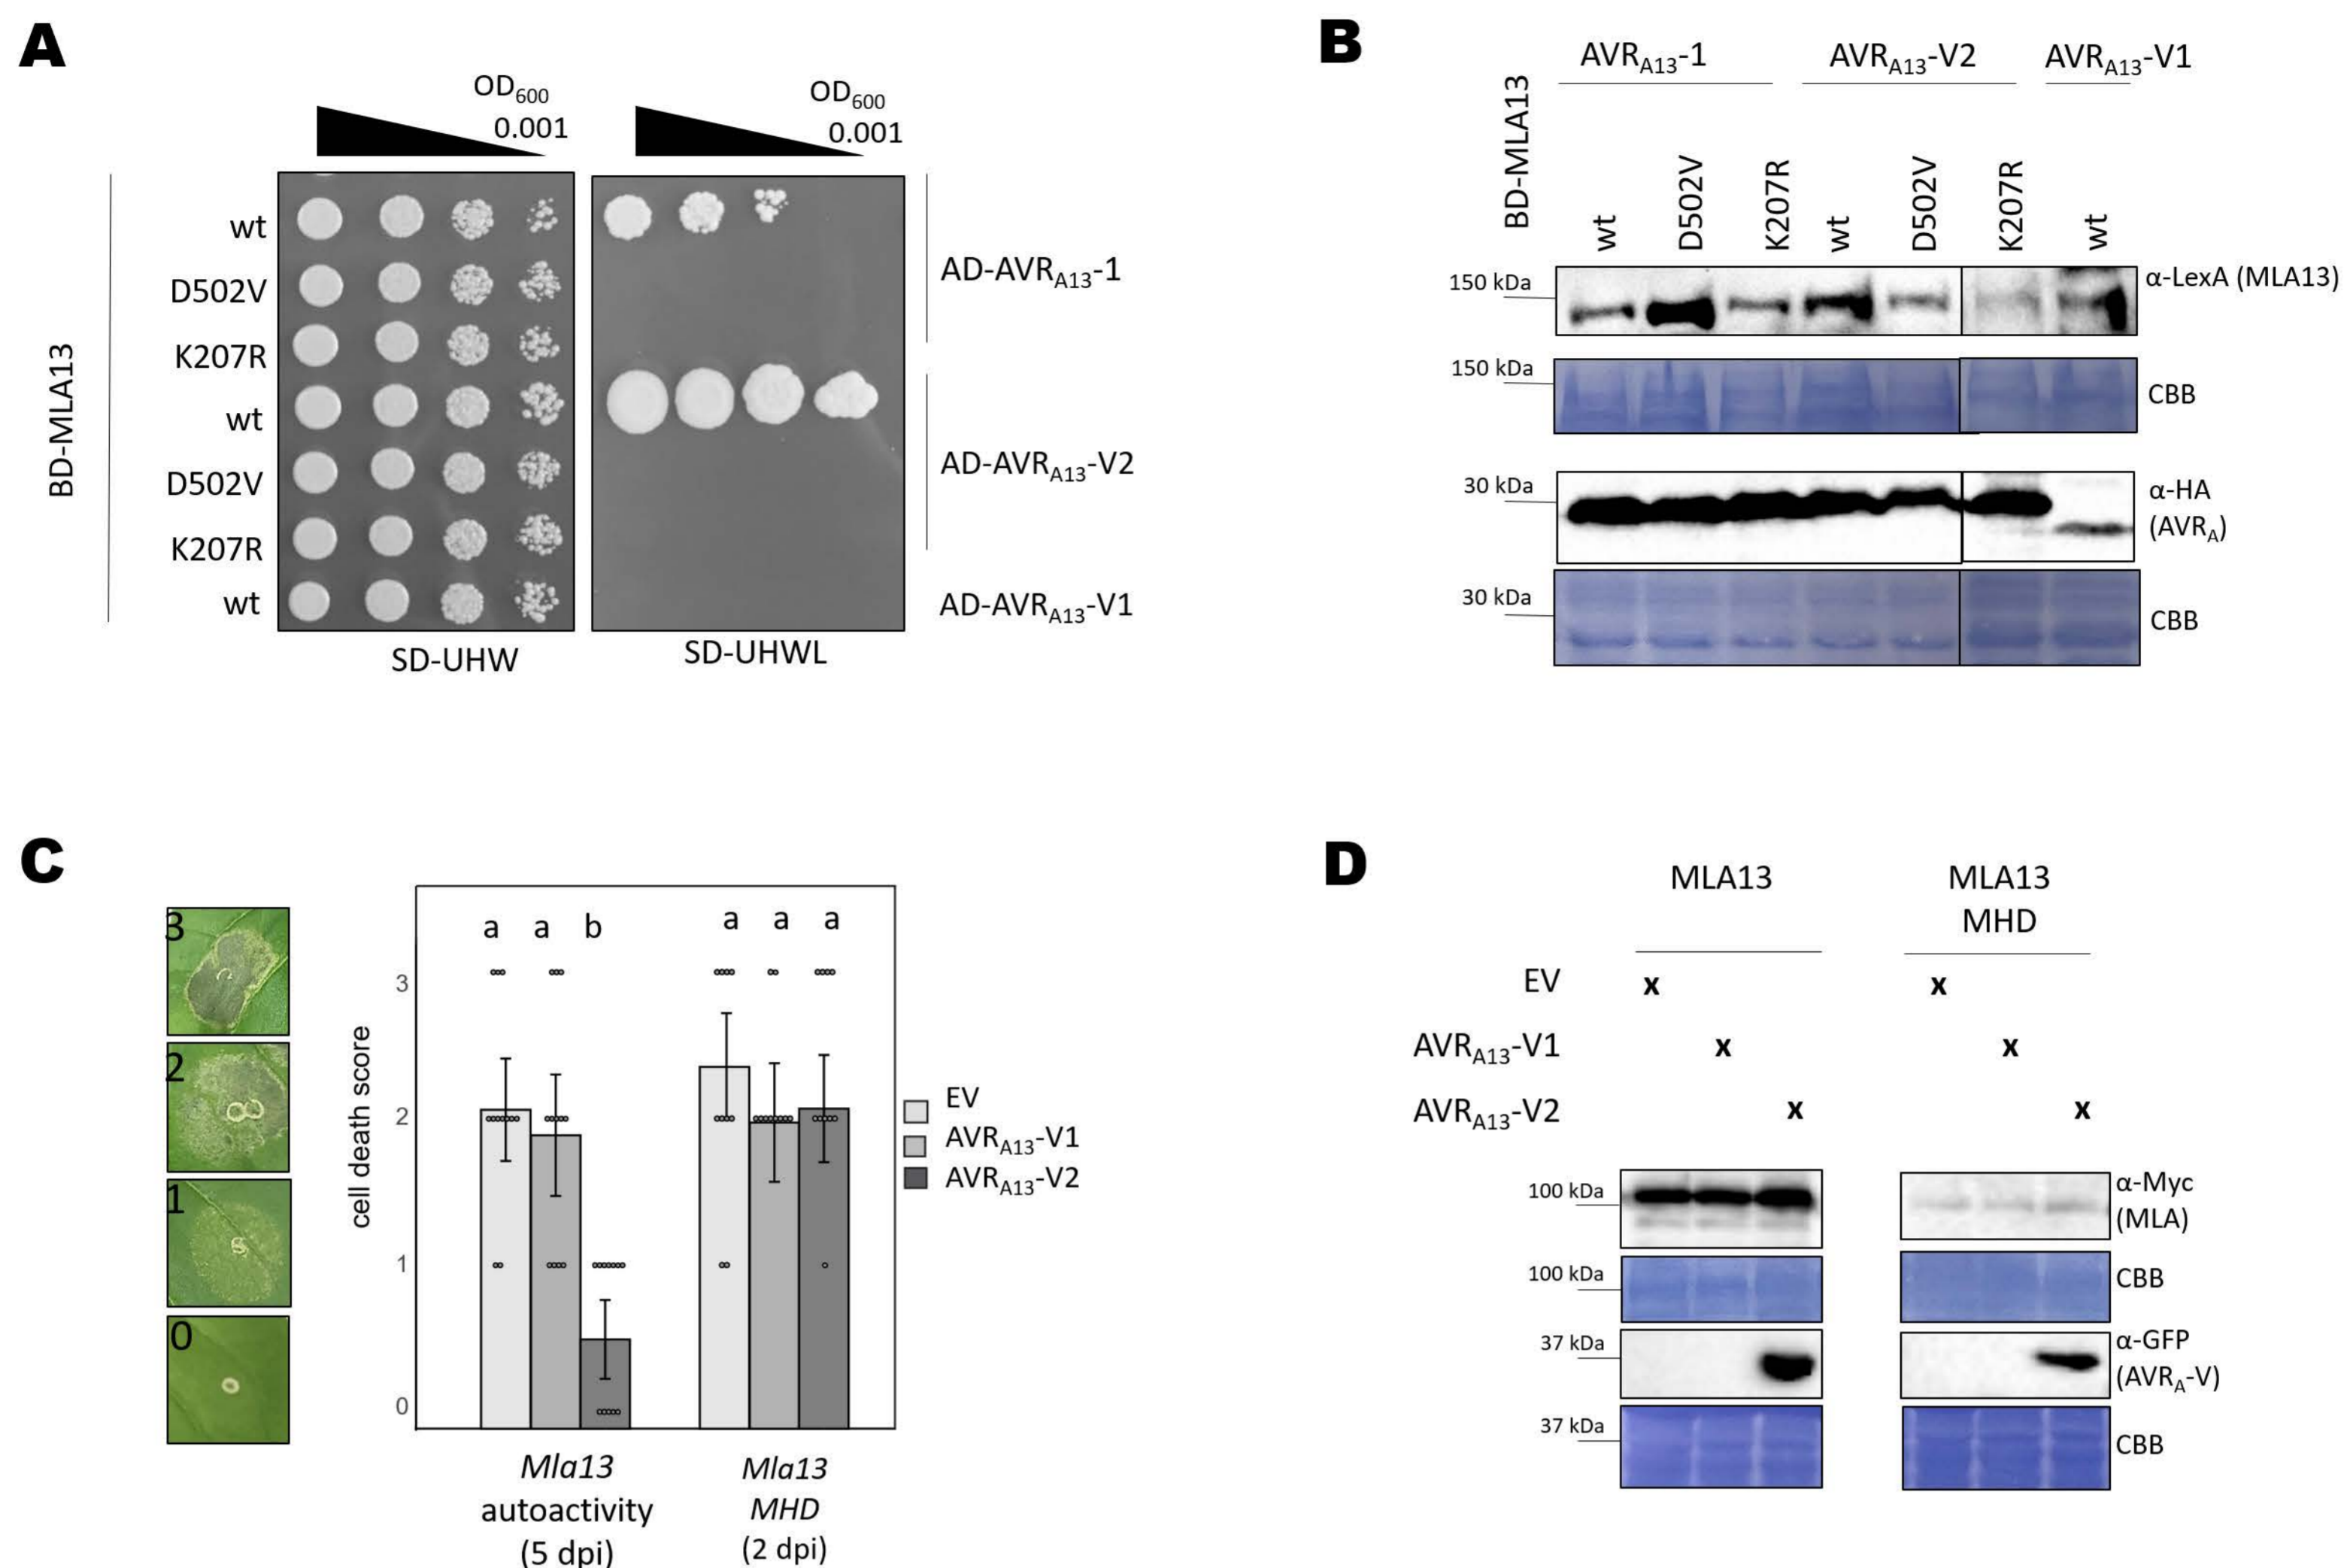

**Fig. 3: Amino acid exchanges in the nucleotide-binding site of MLA13 compromise AVR<sub>A13</sub> effector binding.** (A, B) Yeast cells were co-transformed with *Mla13* wt or mutant variants *Mla13*<sup>D502V</sup> (MHD) or *Mla13* K207R (P-loop) fused N-terminally to the *LexA* binding domain sequence (BD) and AVR<sub>A13</sub> variants lacking SPs fused N-terminally to the *B42* activation domain (AD) and *1xHA* tag sequence as indicated. (A) Growth of transformants was determined on selective growth media containing raffinose and galactose as carbon sources but lacking uracil, histidine and tryptophan (-UHW), and interaction of proteins was determined by leucine reporter activity reflected by growth of yeast on selective media containing raffinose and galactose as carbon sources, but lacking uracil, histidine, tryptophan and leucine (-UHWL). Figures shown are representatives of at least three experiments and pictures were taken 6 to 8 days after drop out. (B) Protein levels of BD-MLA13 variants and AD-AVR<sub>A</sub> variants corresponding to yeast of A. Yeast transformants were grown in raffinose and galactose containing selective media lacking uracil, tryptophan, and histidine to OD<sub>600</sub> = 1. Cells were harvested, total protein extracted, separated by gel electrophoresis, and western blots (WB) were probed with anti-LexA or anti-HA antibodies as indicated. (C, D) *Nicotiana benthamiana* leaves were co-transformed transiently with cDNAs of AVR<sub>A13</sub>-V1 or AVR<sub>A13</sub>-V2 or empty vector (EV) together with constructs encoding either MLA13 or MLA13<sup>D502V</sup> (pAM-PAT vector) as indicated and under the control of the 35S promoter sequence at a 2:1 ratio. (C) Cell death was determined two (MLA13 MHD) to five days (MLA13) post transformation and scored from 0 to 3 based on the cell death scale indicated. All values obtained in at least three independent experiments are indicated by dots, error bars = standard deviation. Differences between samples were assessed by non-parametric Kruskal-Wallis and subsequent Dunn tests for each MLA variant. Calculated *P* values were as follows: MLA13: *p*=5E-05, MLA13 MHD: *p*=0.078. Samples marked by identical letters in the plots did not differ significantly (*p*<0.05) in the Tukey test for the corresponding MLA. (D) Protein levels corresponding to samples of C. Leaf tissue was harvested 36 hours post infiltration. Total protein was extracted, separated by gel electrophoresis and probed by anti-Myc (MLAs) or anti-GFP (AVR<sub>A13</sub>-V2) western blotting (WB) as indicated. CBB: Coomassie brilliant blue.



## Figure 4

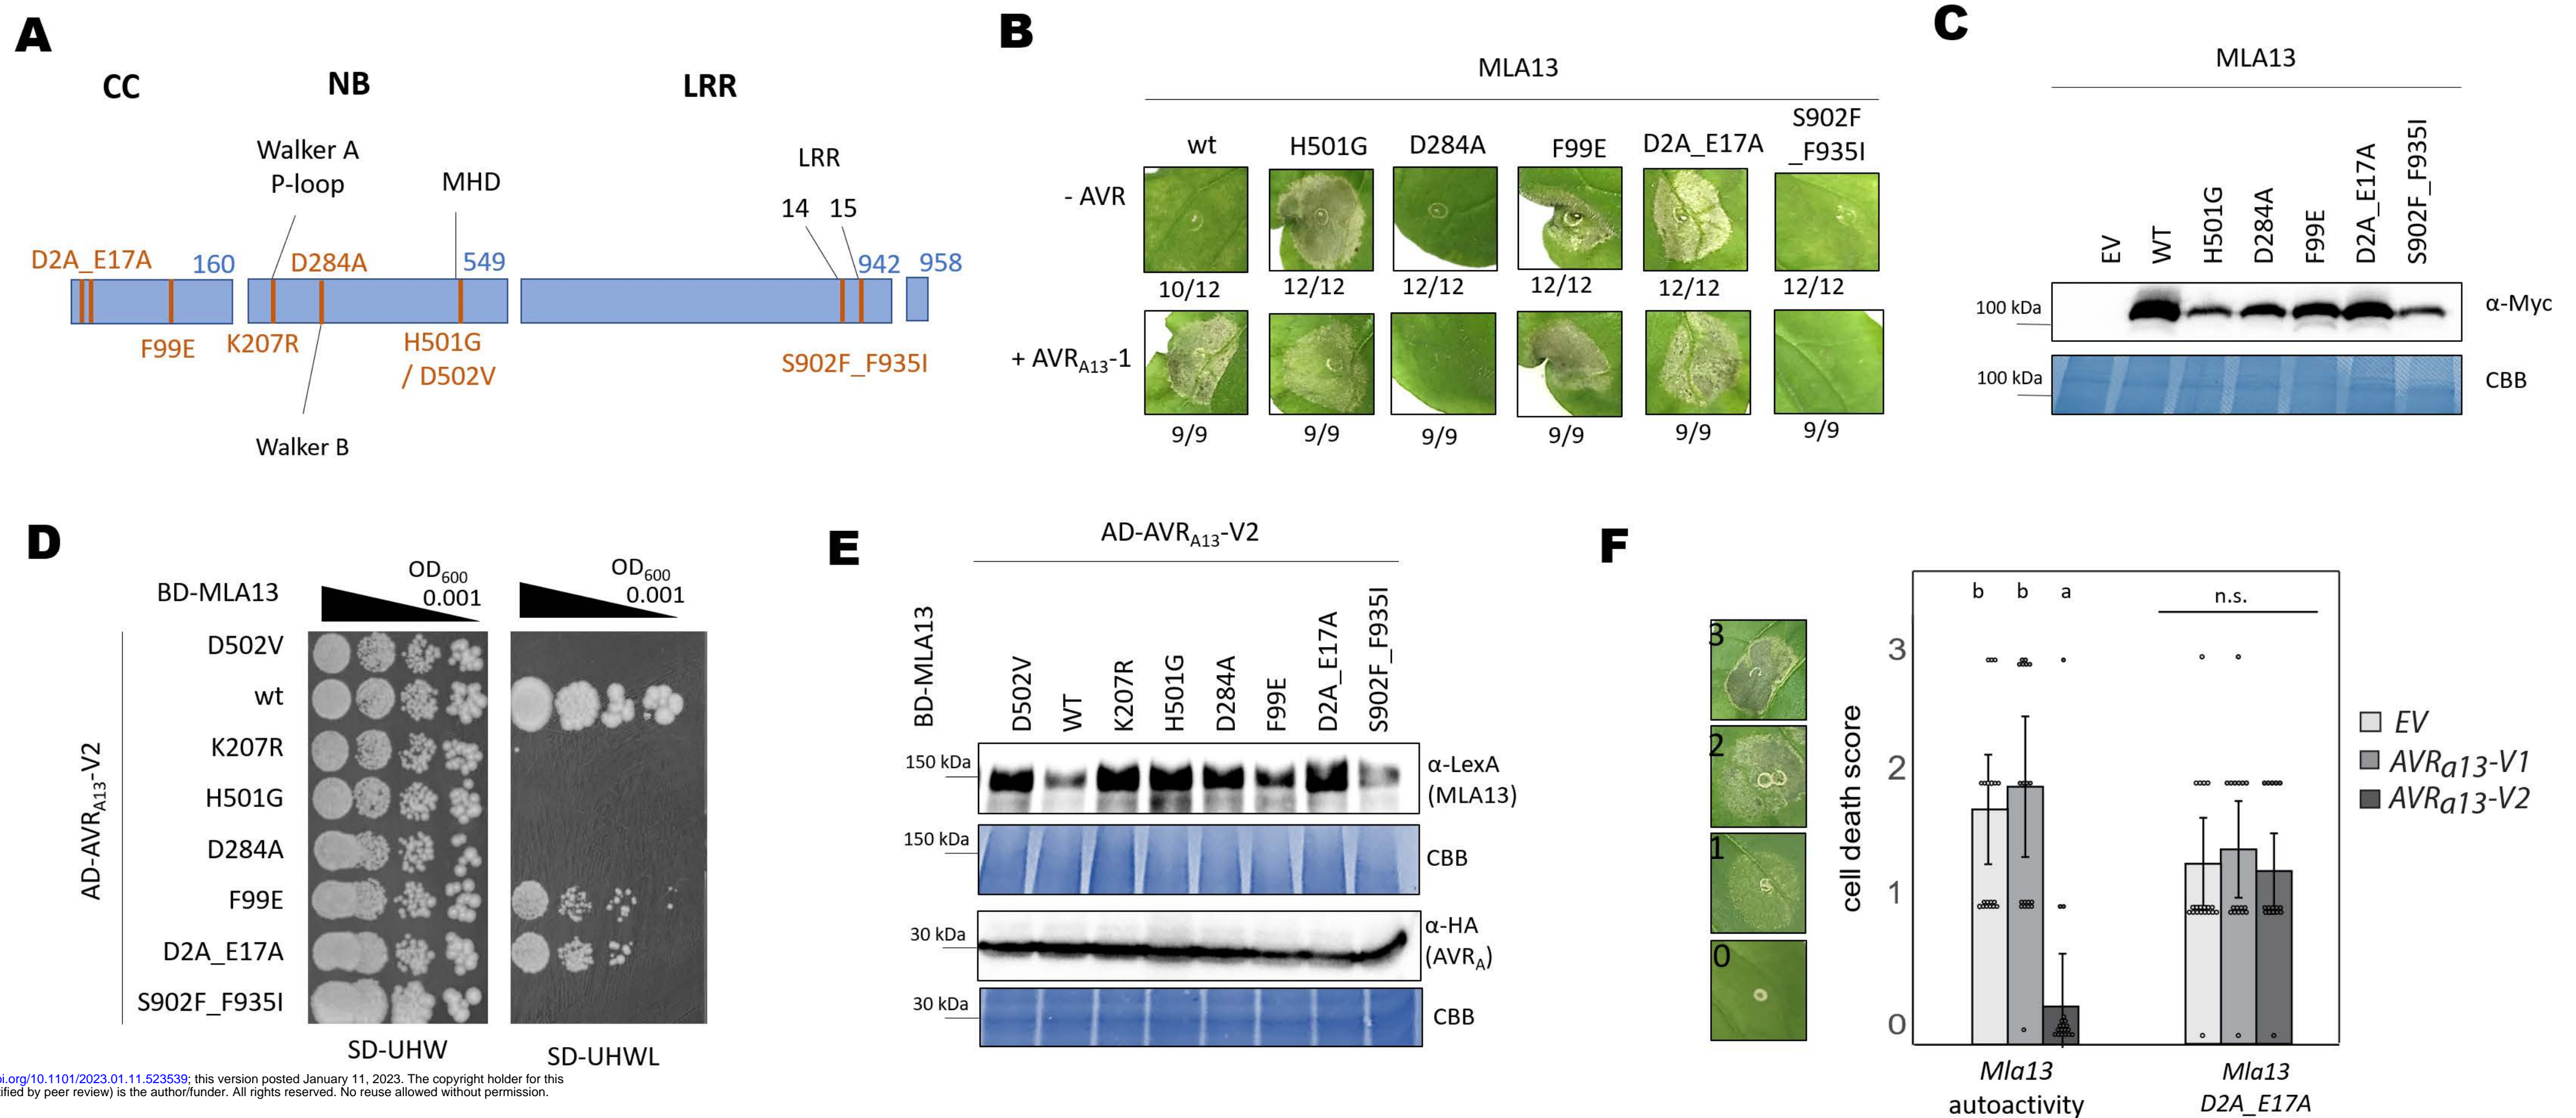

bioRxiv preprint doi: <https://doi.org/10.1101/2023.01.11.523539>; this version posted January 11, 2023. The copyright holder for this preprint (which was not certified by peer review) is the author/funder. All rights reserved. No reuse allowed without permission.

**Fig. 4: Amino acid (aa) exchanges in the coiled-coil (CC) domain de-regulate MLA13 auto-inhibition.** (A) Amino acid (aa) changes in MLA13 mutant variants. The D2A\_E17A and the F99E variants encode changes in the MLA13 coiled-coil (CC) domain, which spans from aa1 to 160. The K207R, D284A, D502V and H501G variants encode changes in the nucleotide-binding site (NB, aa 161 to 549). The S902F\_F935I variants affects the leucine-rich repeats (LRR, aa 550 to 942) which are followed by a short C-terminal amino acids sequence. (B, C) *Nicotiana benthamiana* leaves were transformed transiently with cDNAs of one of the *Mla13* variants as indicated (pGWB517 vector) either with or without *AVR<sub>A13</sub>-1* lacking SPs and fused c-terminally to a *mYFP* sequence. All constructs are under the control of the 35S promoter. (B) Cell death was determined three days post transformation;  $n \geq 9$ . (C) Protein stability of the MLA variants fused to 4xMyc corresponding to constructs of B. Leaf tissue was harvested two days post infiltration. Total protein was extracted, separated by gel electrophoresis and probed by anti-Myc western blotting (WB) as indicated. (D, E) Yeast cells were co-transformed with *Mla13* variants fused N-terminally to the *LexA* binding domain (BD) sequence and *AVR<sub>A13</sub>-V2* lacking SPs fused N-terminally to the *B42* activation domain (AD) and *1xHA* tag sequence as indicated. Growth of transformants was determined on selective growth media containing raffinose and galactose as carbon sources but lacking uracil, histidine and tryptophan (-UHW), and interaction of proteins was determined by leucine reporter activity reflected by growth of yeast on selective media containing raffinose and galactose as carbon sources but lacking uracil, histidine, tryptophan and leucine (-UHWL). Figures shown are representatives of at least three experiments and pictures were taken 6 to 8 days after drop out. (E) Protein levels of BD-MLA13 variants and AD-AVR<sub>A13</sub>-V2 corresponding to yeast of D. Yeast transformants were grown in raffinose and galactose containing selective media lacking uracil, tryptophan, and histidine to OD<sub>600</sub> = 1. Then, cells were harvested, total protein extracted, separated by gel electrophoresis, and western blots (WB) were probed with anti-LexA or anti-HA antibodies as indicated. CBB: Coomassie brilliant blue. (F) *N. benthamiana* leaves were co-transformed transiently with cDNAs of *AVR<sub>A13</sub>-V1*, *AVR<sub>A13</sub>-V2* or *empty vector* (EV) together with constructs encoding the *Mla13* variant as indicated and under the control of the 35S promoter sequence at a 2:1 ratio. Cell death was determined three days post transformation and scored from 0 to 3 based on the cell death scale indicated. All values obtained in at least two independent experiments are indicated by dots, error bars = standard deviation. Differences between samples were assessed by non-parametric Kruskal-Wallis and subsequent Dunn tests for each MLA variant. Calculated *P* values were as follows: *Mla13*:  $p = 9.38E-07$ , *Mla13*<sup>D2A\_E17A</sup>:  $p = 0.77$ . n.s. = no significant difference.



# Figure 5

bioRxiv preprint doi: <https://doi.org/10.1101/2023.01.11.523539>; this version posted January 11, 2023. The copyright holder for this preprint (which was not certified by peer review) is the author/funder. All rights reserved. No reuse allowed without permission.

## A

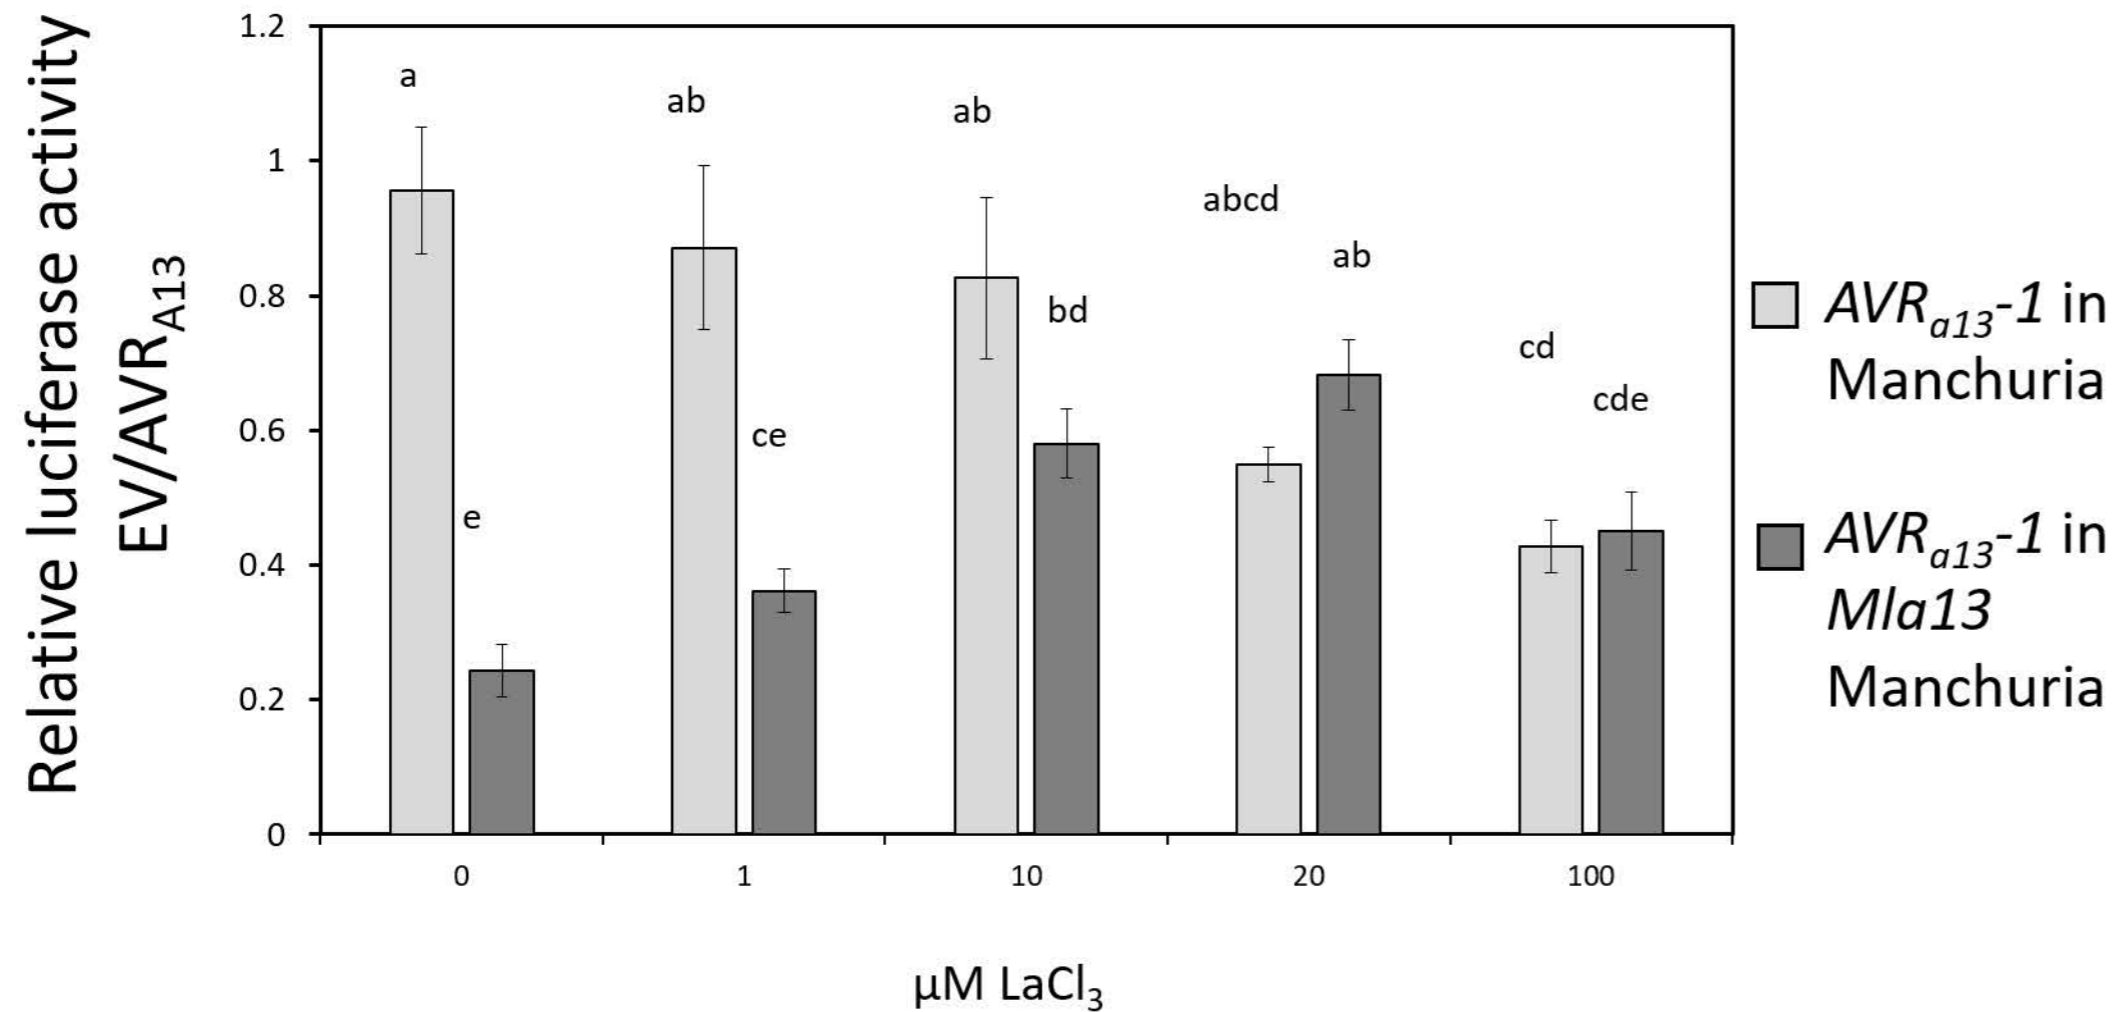

## B

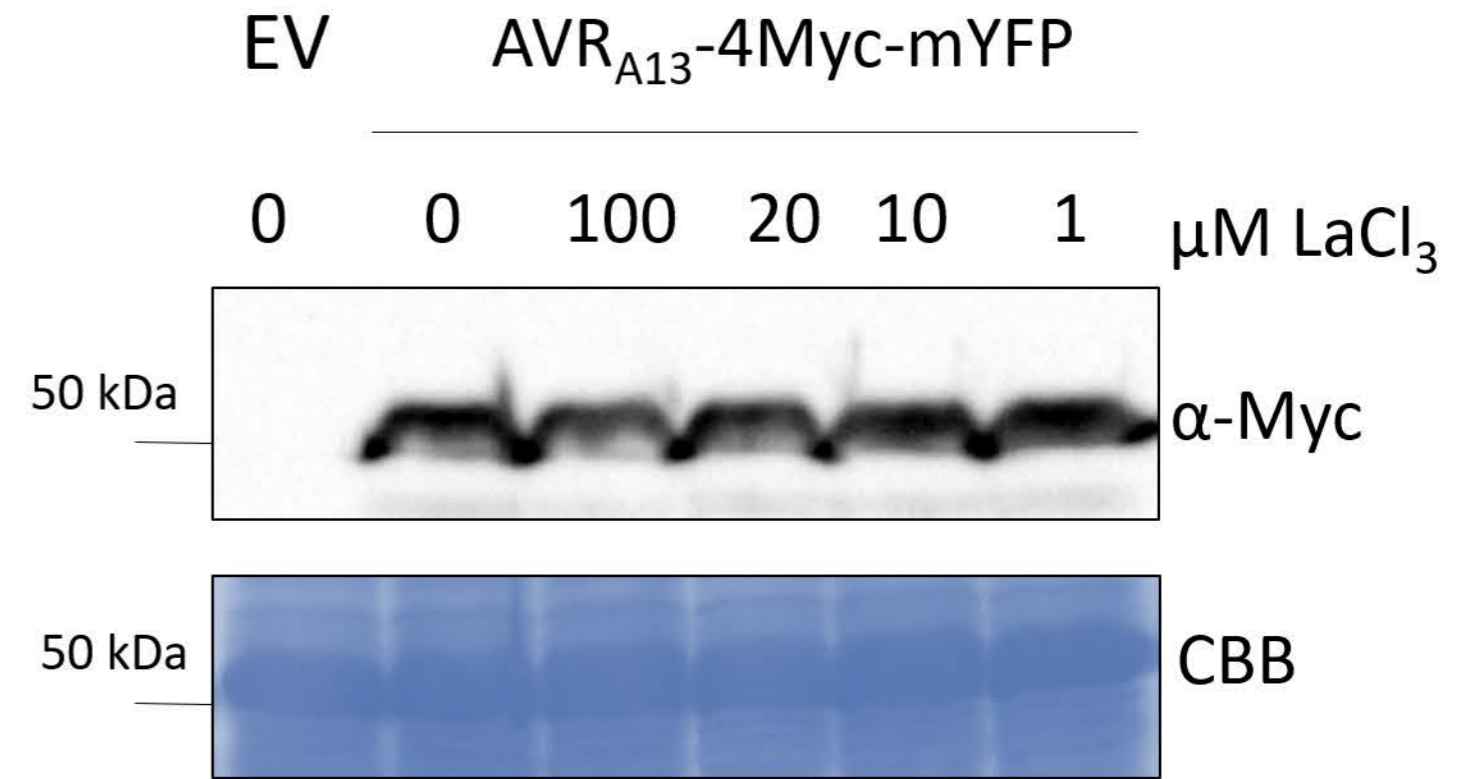

**Fig. 5: Calcium channel activity is required for *Mla13*-mediated cell death in barley (A)** Barley protoplasts of lines CI 16155 (cultivar Manchuria *Mla13*) and CI2330 (Manchuria) were transfected with *pUBQ:luciferase* and piPKb002 containing *AVR<sub>a13-1</sub>* cDNA without signal peptide or a piPKb002 empty vector control and recovered in the presence of LaCl<sub>3</sub> at concentrations indicated. Luciferase activity was determined 16 hr post transfection/addition of LaCl<sub>3</sub> as a proxy for cell death and normalized against the respective *EV* sample. Error bars = standard deviation. Differences between samples were assessed using non-parametric Kruskal-Wallis and subsequent Dunn's post hoc tests.  $p = 6.179e-10$ . Samples marked by identical letters in the plot did not differ significantly ( $p < 0.05$ ) in Dunn's test. **(B)** Protoplasts derived from cultivar Manchuria CI2330 leaves transfected with *pZmUBQ:AVR<sub>a13-1</sub>-mYFP* were harvested 16h post transfection/LaCl<sub>3</sub> treatment. Total protein was extracted, separated by gel electrophoresis, and western blots (WB) were probed with anti-GFP antibodies. CBB: Coomassie brilliant blue.



# Figure S1

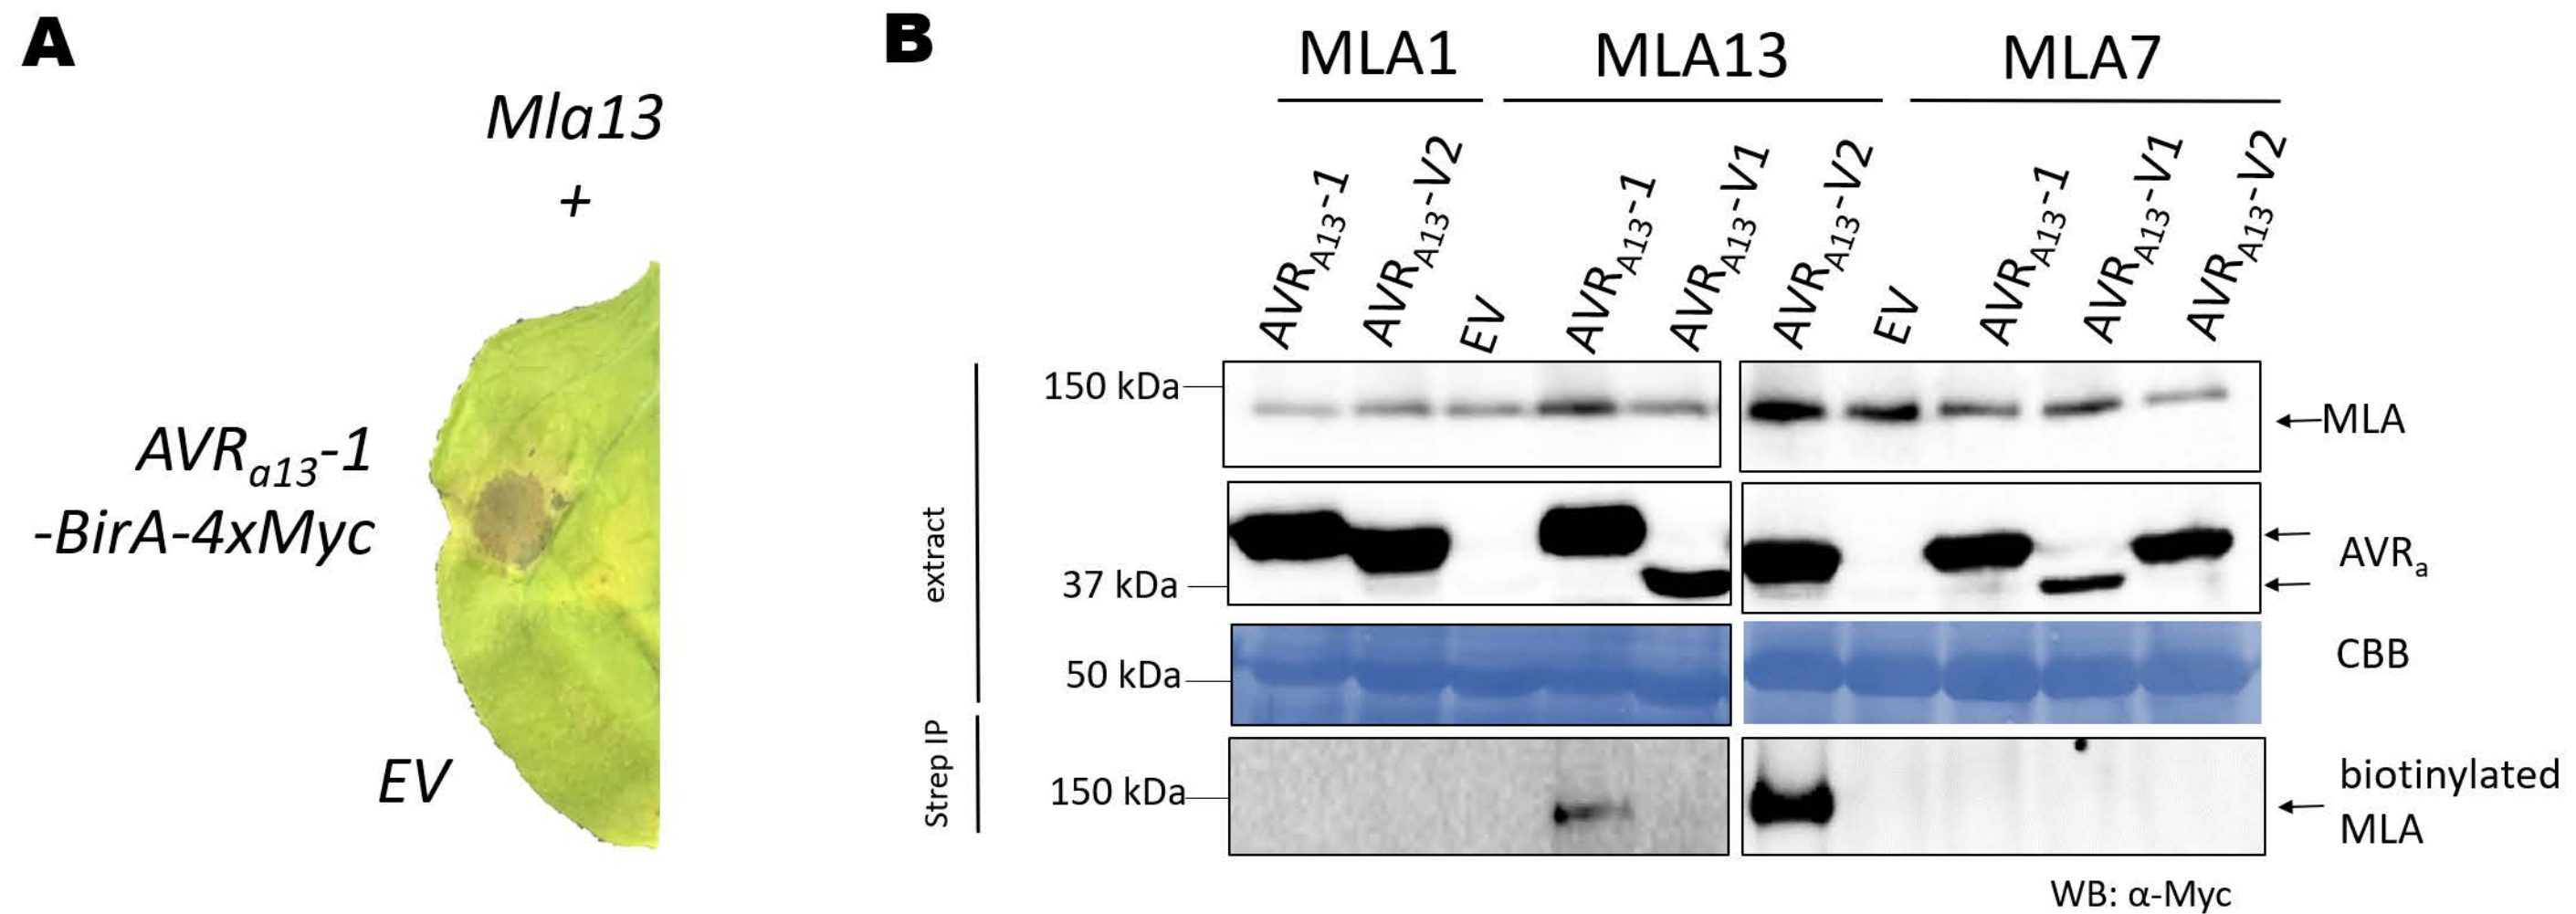

**Figure S1: (A)** *Nicotiana benthamiana* leaves were transformed transiently with cDNAs of the *Mla13* together with empty vector (EV) or *AVR<sub>a13</sub><sup>-1</sup>* lacking SPs and fused c-terminally to *BirA-4Myc* tag sequence and expressed from the 35S promotor. Cell death was determined three days post transformation and picture shows representative of at least three independent leaves. **(B)** *N. benthamiana* leaves were transformed transiently with cDNAs of *Mla1* or *Mla7* or *MLA13* fused C-terminally to a *4xMyc* sequence and at 24 h before re-transformation with cDNAs encoding *AVR<sub>a13</sub><sup>-1</sup>-BirA-4xMyc*, *AVR<sub>a13</sub><sup>-V1</sup>-BirA-4xMyc*, *AVR<sub>a13</sub><sup>-V2</sup>-BirA-4xMyc* or empty vector (EV) as indicated. All leaves were treated with 10 μM biotin by infiltration at 24h after the second transformation. Leaf tissue was harvested 24h post biotin treatment. Total protein was extracted under denaturing conditions and recovered by Strep IP, separated by gel electrophoresis and probed by anti-Myc western blotting (WB). CBB: Coomassie brilliant blue.



# Figure S2

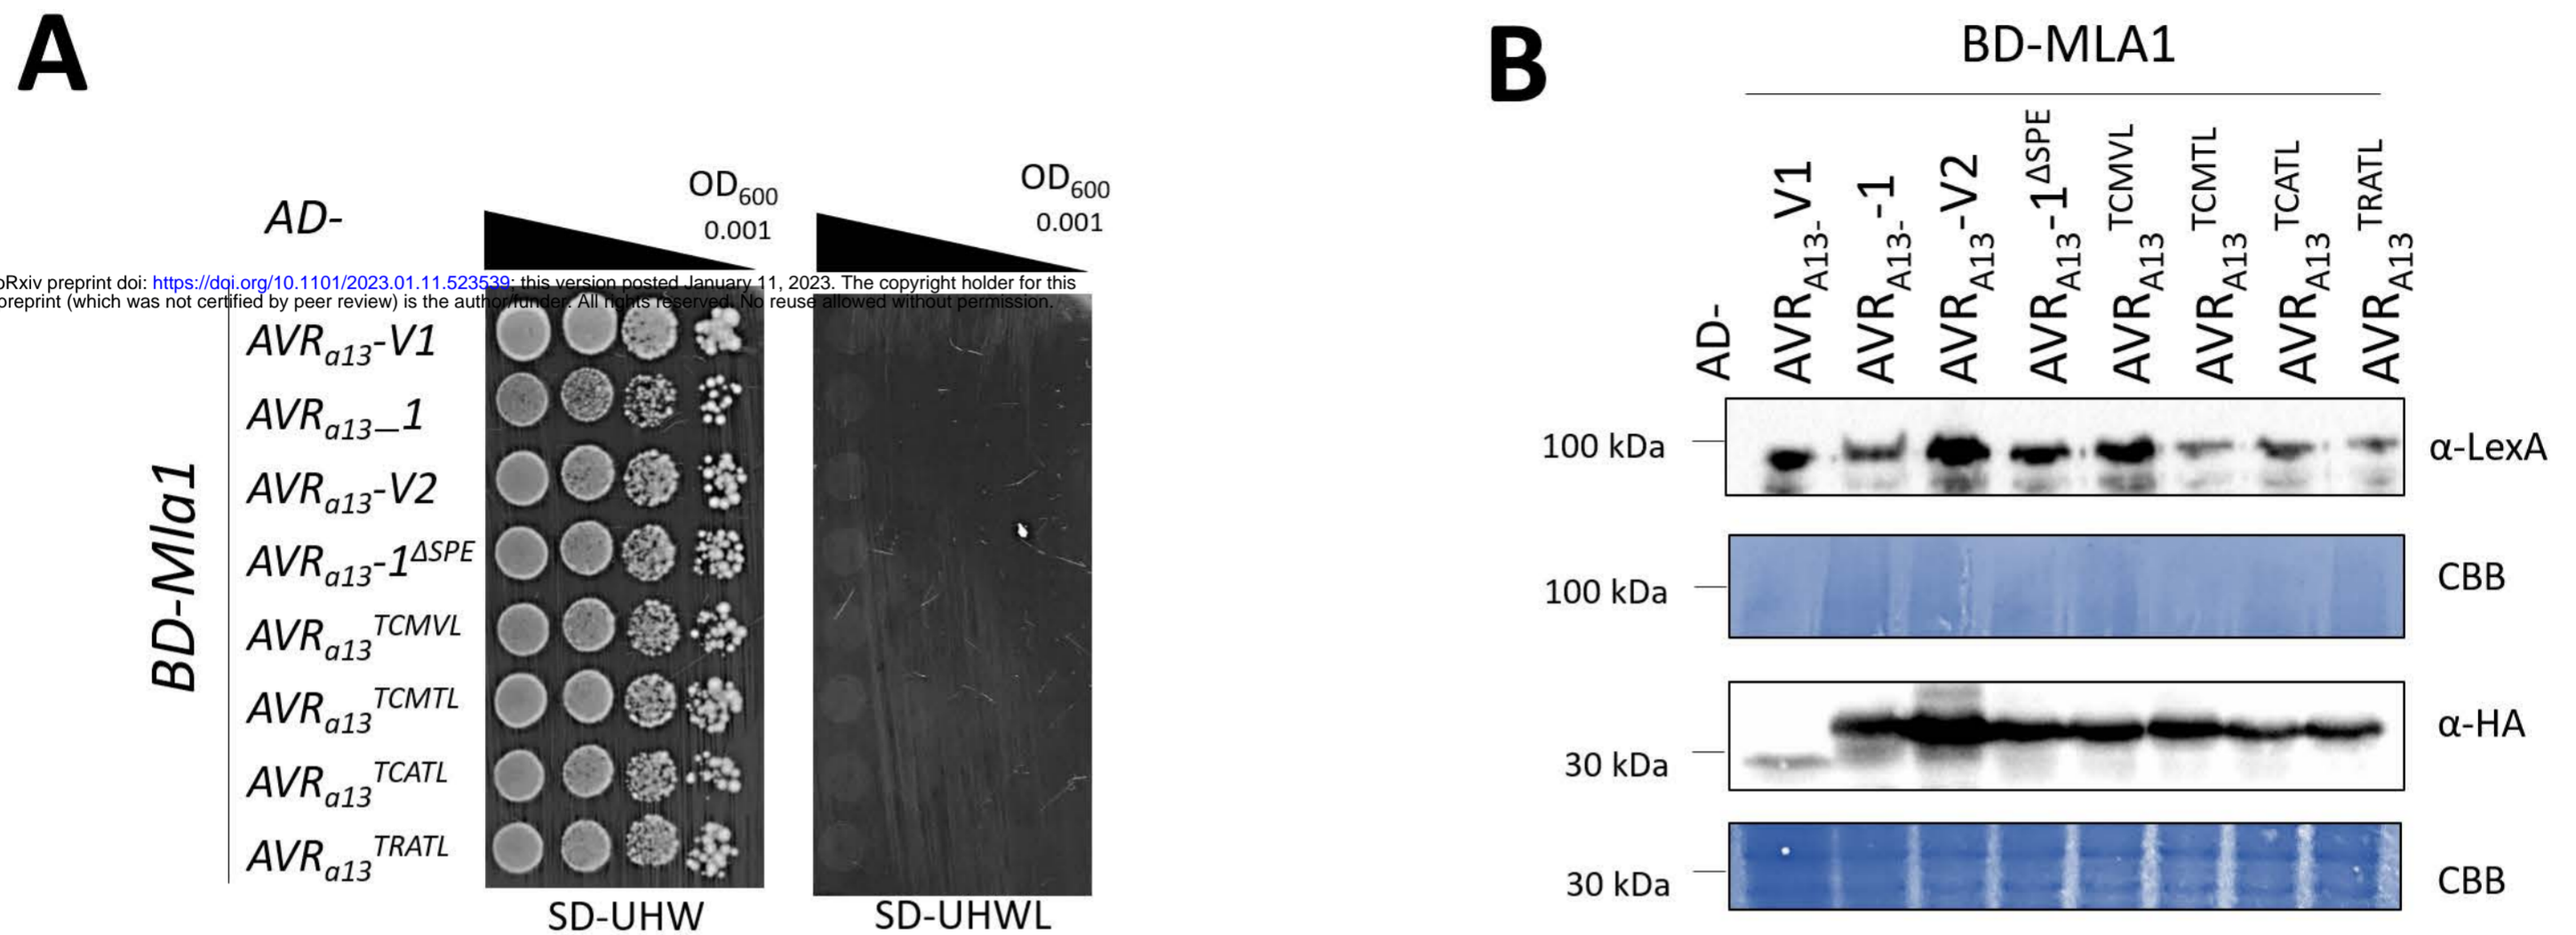

**Fig. S2: Specificity control to Figure 1D. (A,B)** Yeast cells were co-transformed with *Mla1* fused N-terminally to the *LexA* binding domain sequence (BD) and *AVR<sub>a13</sub>* variants lacking SPs fused N-terminally to the *B42* activation domain (AD) and 1xHA tag sequence as indicated. Growth of transformants was determined on selective growth media containing raffinose and galactose as carbon sources but lacking uracil, histidine and tryptophan (-UHW), and interaction of proteins was determined by leucine reporter activity reflected by growth of yeast on selective media containing raffinose and galactose as carbon sources but lacking uracil, histidine, tryptophan and leucine (-UHWL). Figures shown are representatives of at least three experiments and pictures were taken 6 to 8 days after drop out. (B) Protein levels of BD-MLA1 and AD-*AVR<sub>A</sub>* variants corresponding to yeast of D. Yeast transformants were grown in raffinose and galactose containing selective media lacking uracil, tryptophan, and histidine to  $OD_{600} = 1$ . Then, cells were harvested, total protein extracted, separated by gel electrophoresis, and western blots (WB) were probed with anti-*LexA* or anti-HA antibodies as indicated. CBB: Coomassie brilliant blue.



## Figure S3

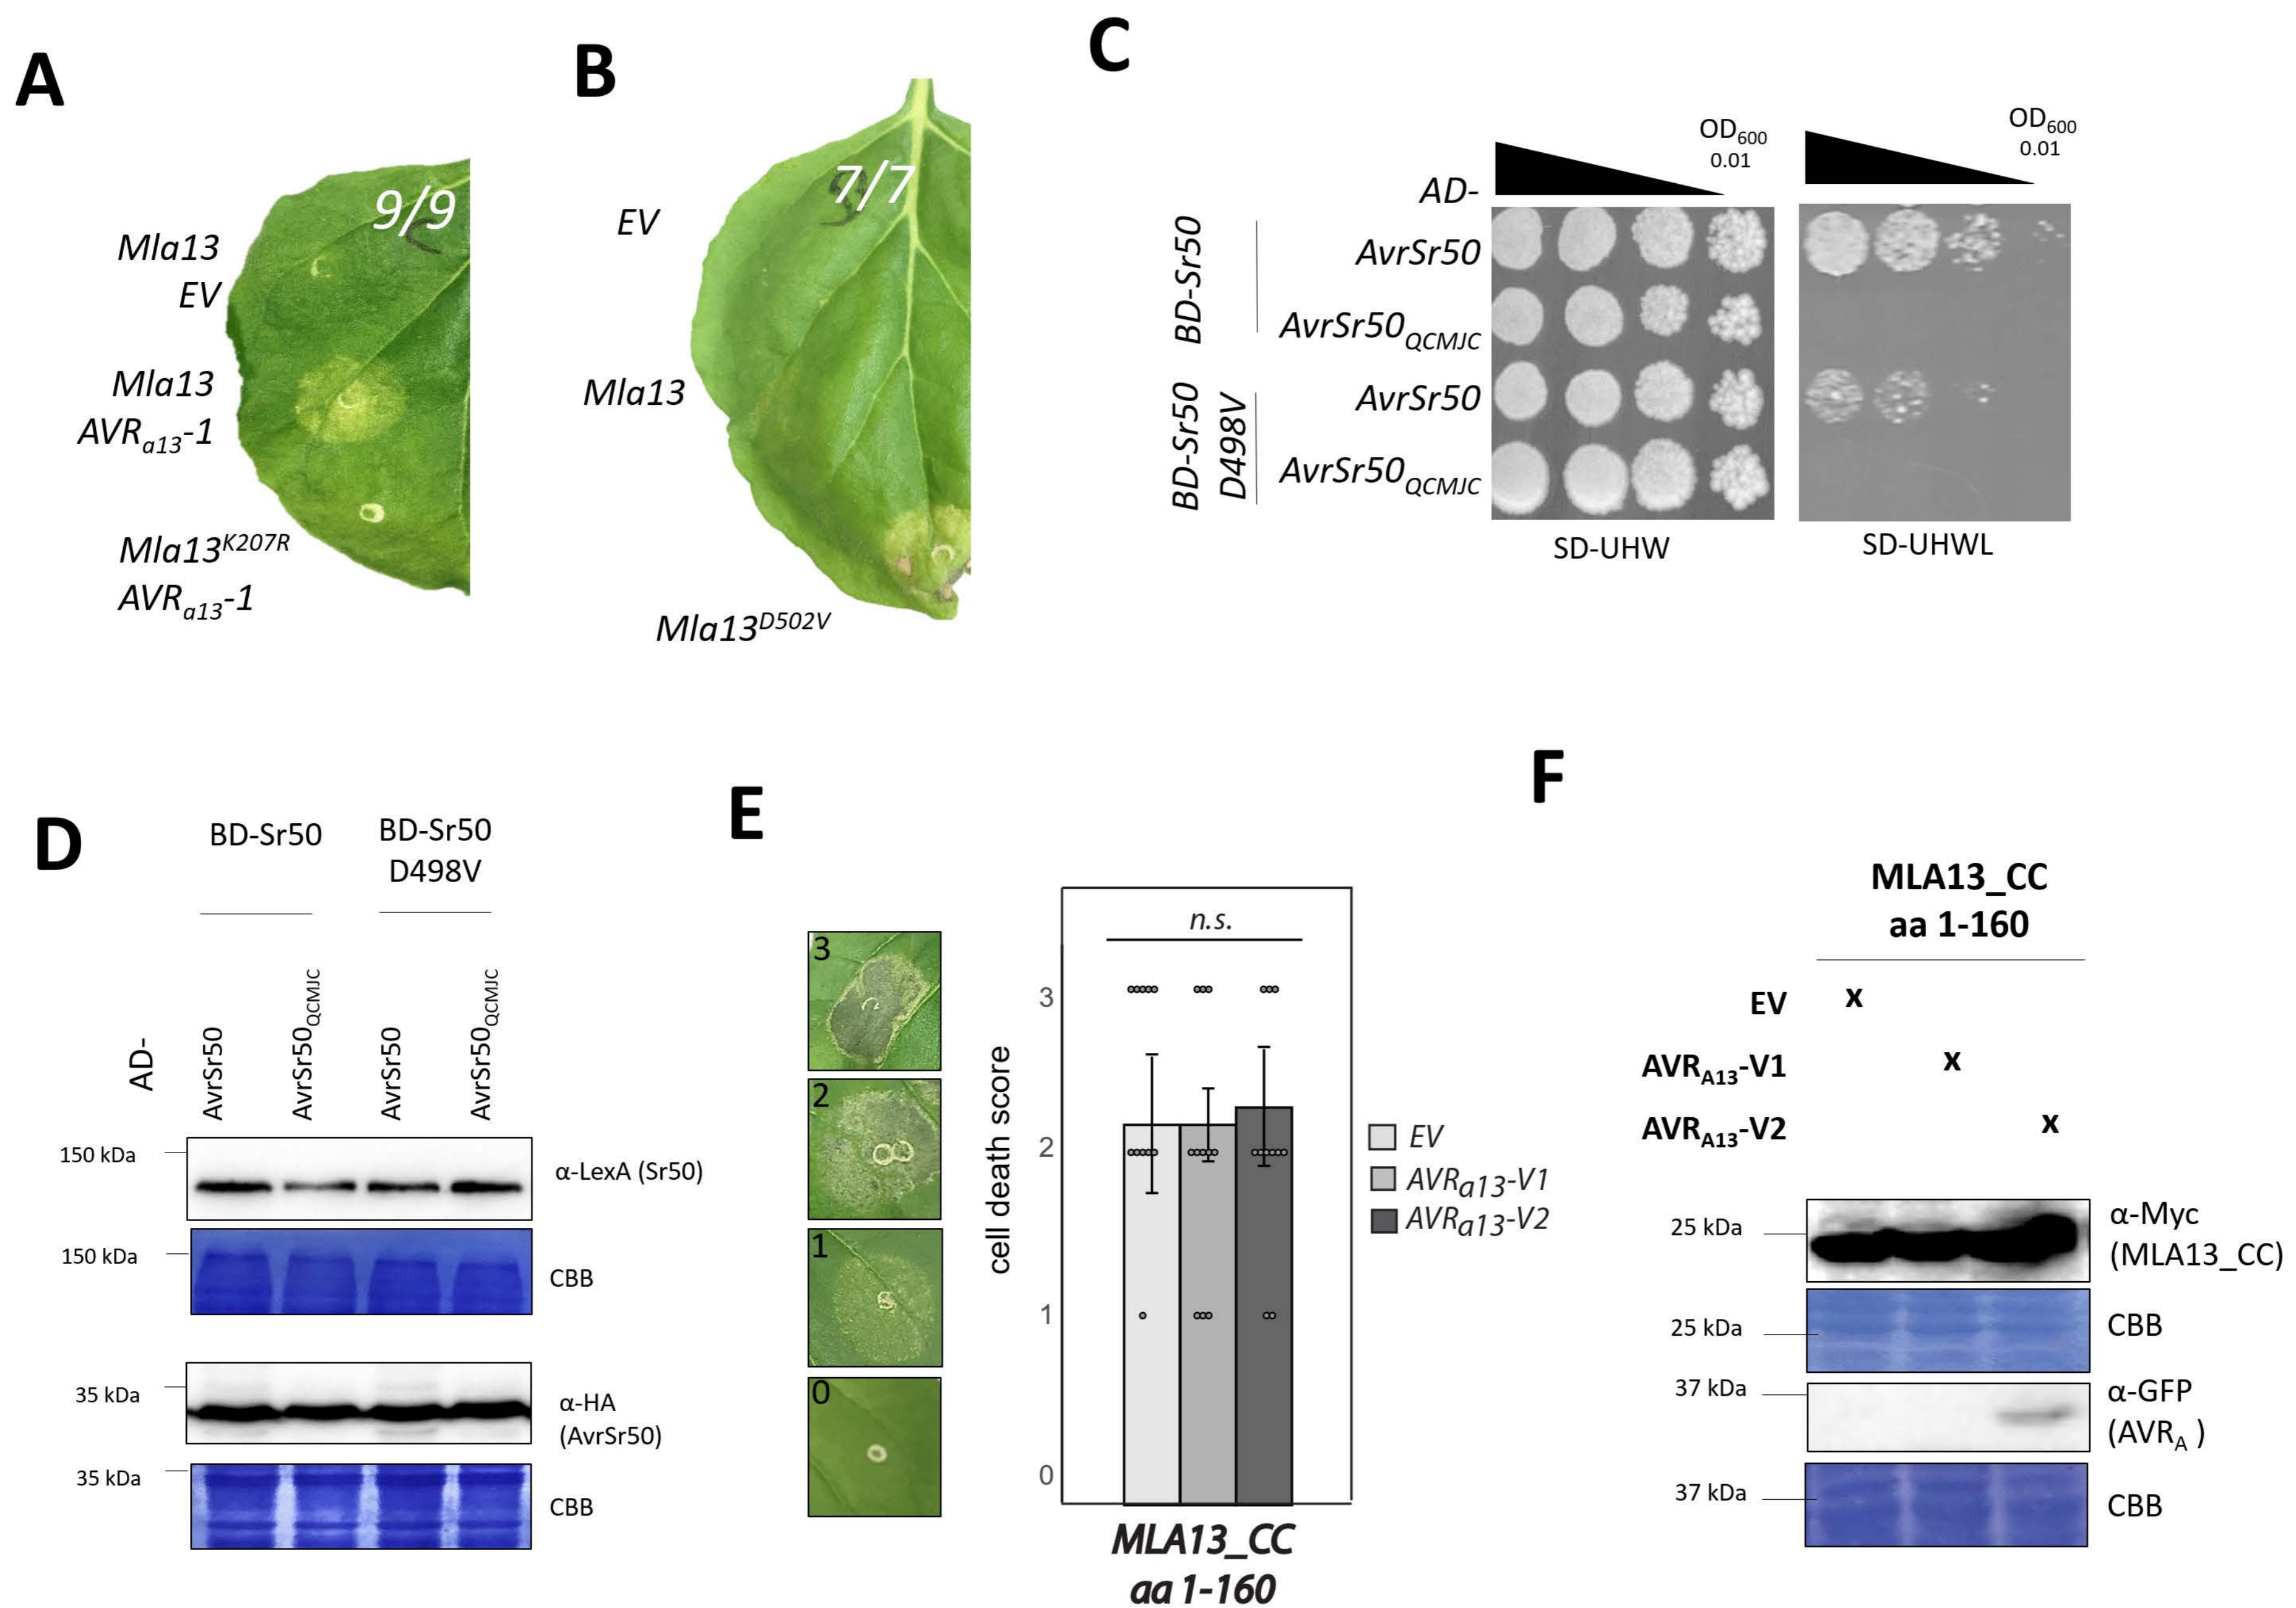

**Fig. S3:** (A, B) *Nicotiana benthamiana* leaves were co-transformed transiently with empty vector (EV) or constructs encoding either MLA13, MLA13 K207D or MLA13 D502V (pGWB) as indicated with (A) or without (B) cDNA encoding of *AVR<sub>a13-1</sub>* or EV. All cDNAs were under the control of the 35S promoter sequence. Cell death was determined three days post transformation. (C, D) Yeast cells were co-transformed with Sr50 or Sr50 D498V fused N-terminally to the LexA binding domain sequence (BD) and AvrSr50 variants lacking SPs fused N-terminally to the B42 activation domain (AD) and 1xHA tag sequence as indicated. Growth of transformants was determined on selective growth media containing raffinose and galactose as carbon sources but lacking uracil, histidine and tryptophan (-UHW), and interaction of proteins was determined by leucine reporter activity reflected by growth of yeast on selective media containing raffinose and galactose as carbon sources but lacking uracil, histidine, tryptophan and leucine (-UHWL). Figures shown are representatives of at least three experiments and pictures were taken 12 to 14 days after drop out. (B) Protein levels of BD-Sr50 and AD-AvrSr50 variants corresponding to yeast of C. Yeast transformants were grown in raffinose and galactose containing selective media lacking uracil, tryptophan, and histidine to OD<sub>600</sub> = 1. Then, cells were harvested, total protein extracted, separated by gel electrophoresis, and western blots (WB) were probed with anti-LexA or anti-HA antibodies as indicated. (E) *Nicotiana benthamiana* leaves were co-transformed transiently with cDNAs of *AVR<sub>a13-V1</sub>* or *AVR<sub>a13-V2</sub>* or empty vector (EV) together with constructs encoding the MLA13 coiled-coil (CC) domain (aa 1-160). (E) Cell death was determined two days post transformation and scored from 0 to 3 based on the cell death scale indicated. All values obtained in at least three independent experiments are indicated by dots, error bars = standard error. Differences between samples were assessed by the non-parametric Kruskal-Wallis test.  $p = 0.623871$ ; n.s. = not significant. (F) Protein levels corresponding to samples of C. Leaf tissue was harvested 36 hours post infiltration. Total protein was extracted, separated by gel electrophoresis and probed by anti-Myc (MLA13\_CC) or anti-GFP (*AVR<sub>A13-V2</sub>*) western blotting as indicated. CBB: Coomassie brilliant blue.



# Figure S4

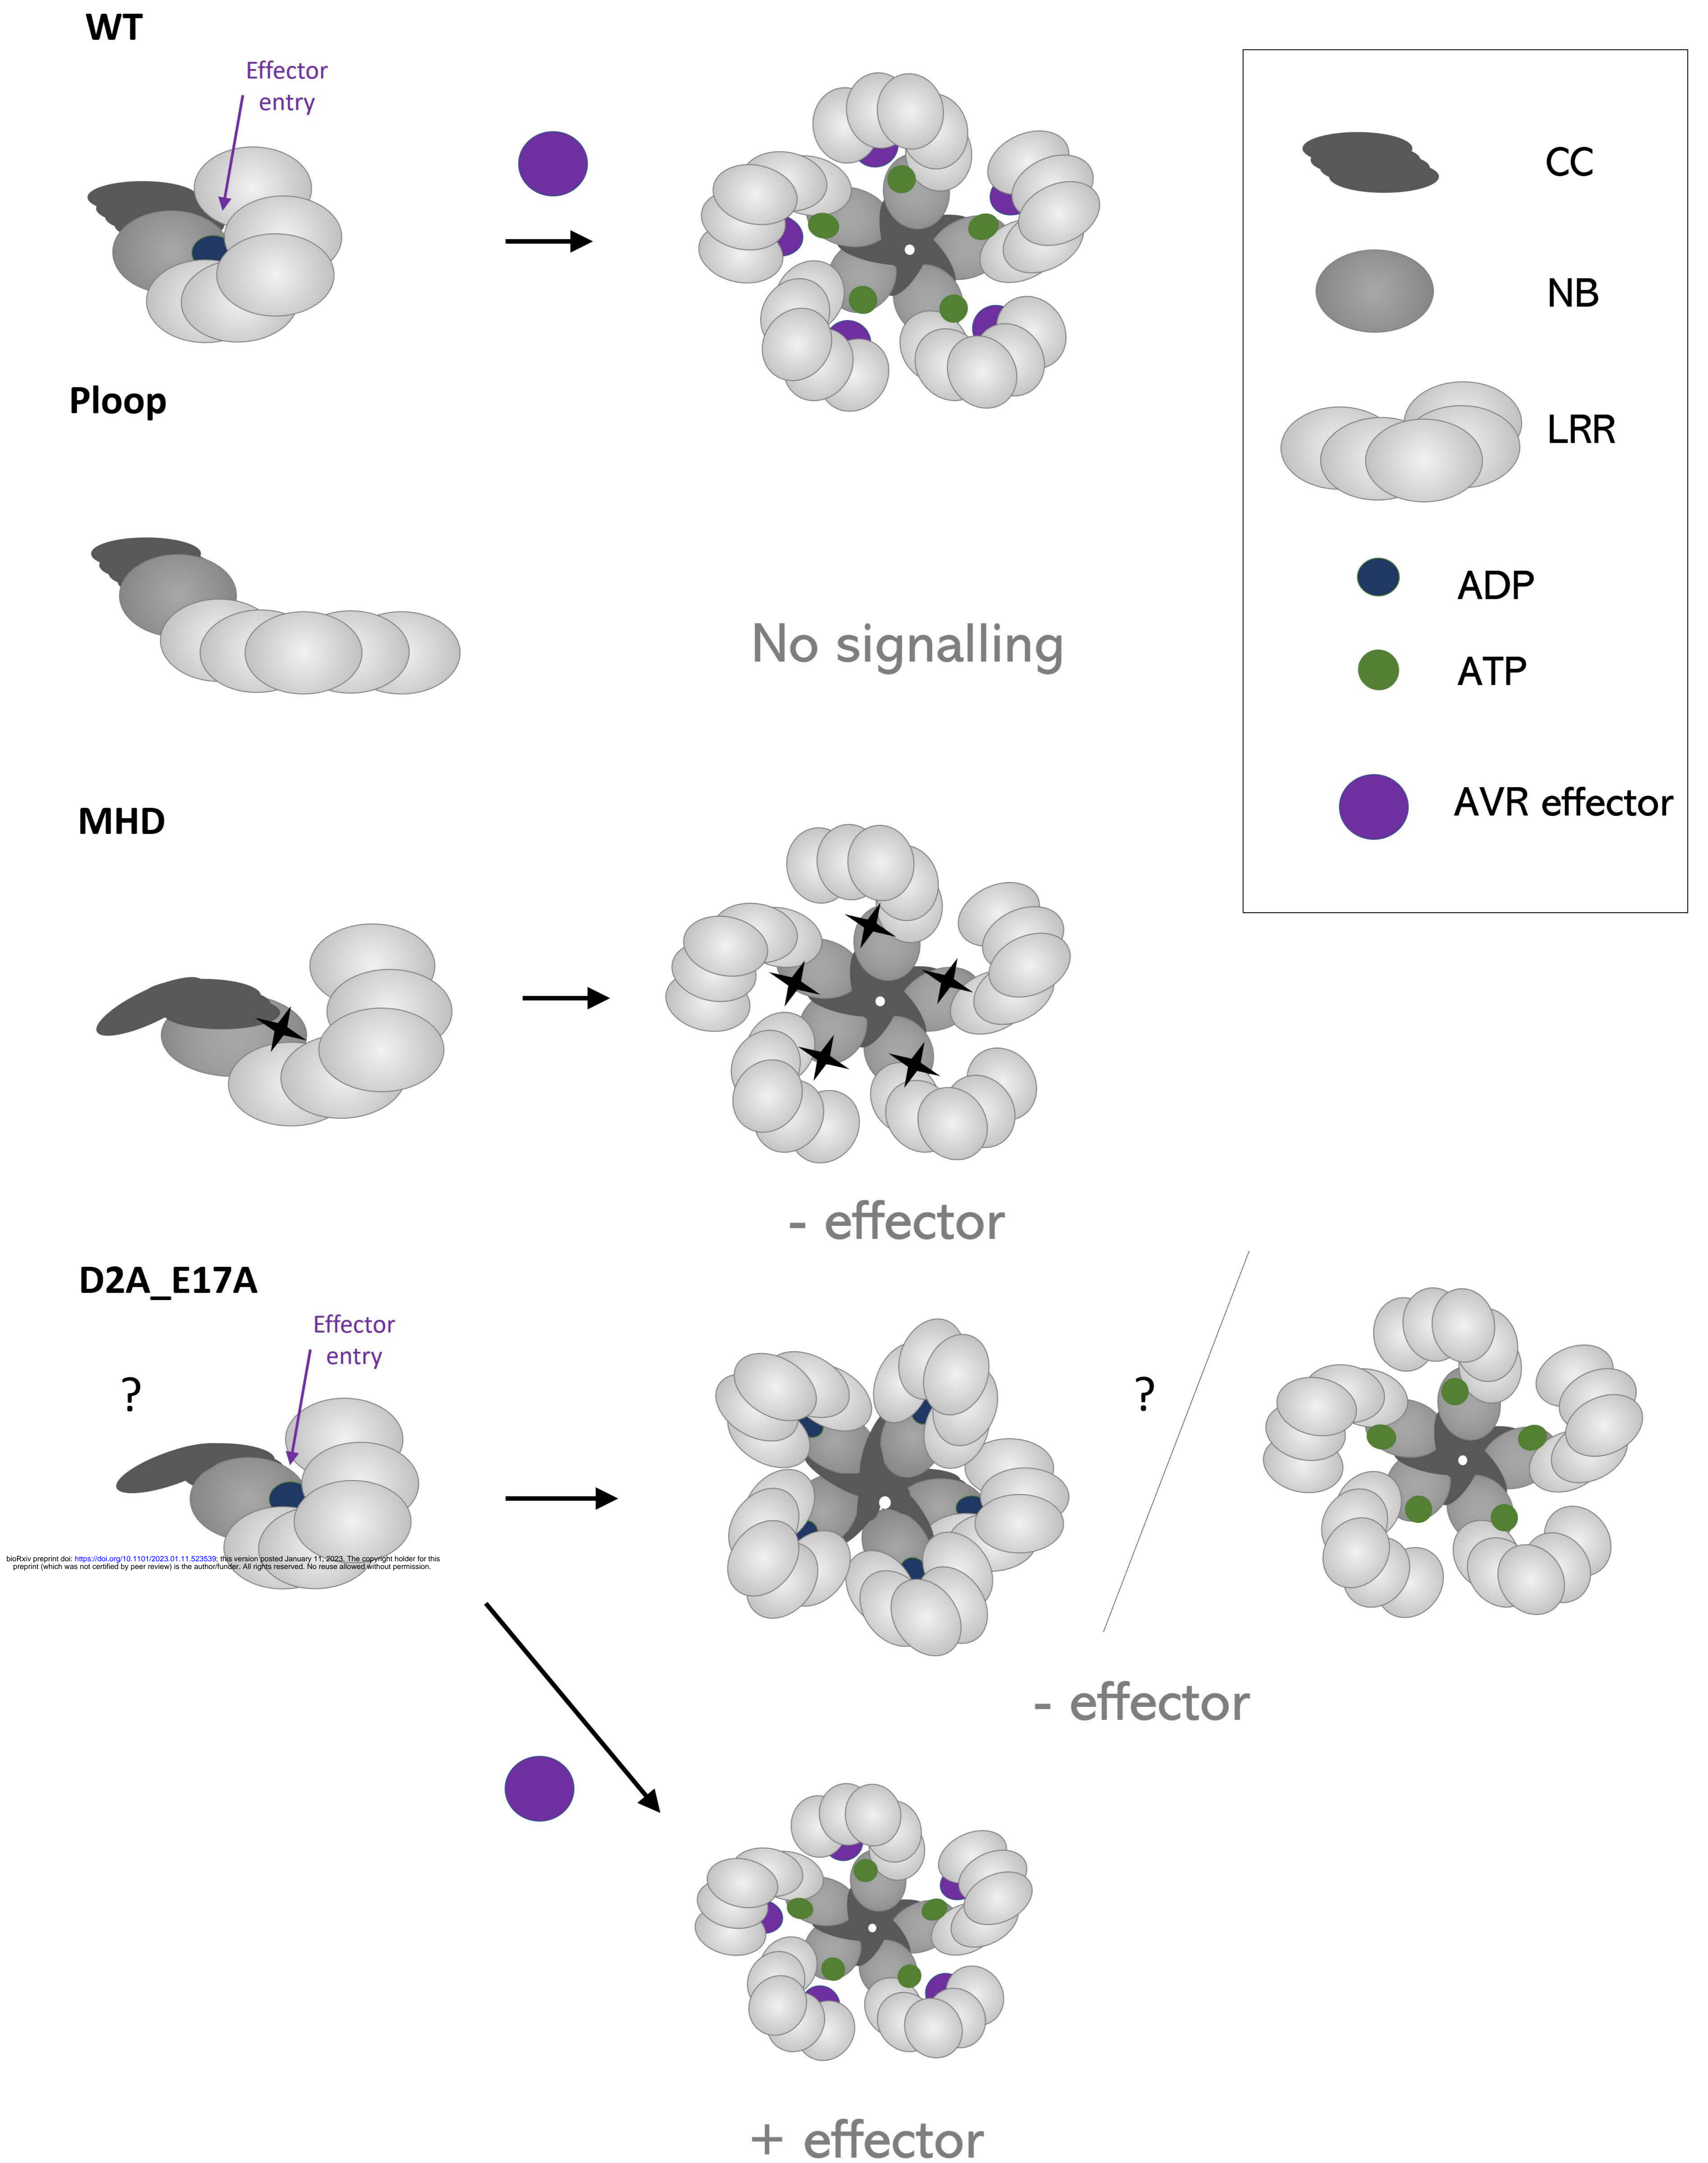

**Fig. S4:** Schematic models of monomeric and oligomeric MLA13 wild type, MLA13 P-loop, MLA13 MHD and MLA13<sup>D2A\_E17A</sup> conformations with indication of putative effector (purple) entry sites and binding of ADP (green) or ATP (blue).



# Figure S5

## A $AVR_{A13-1}$

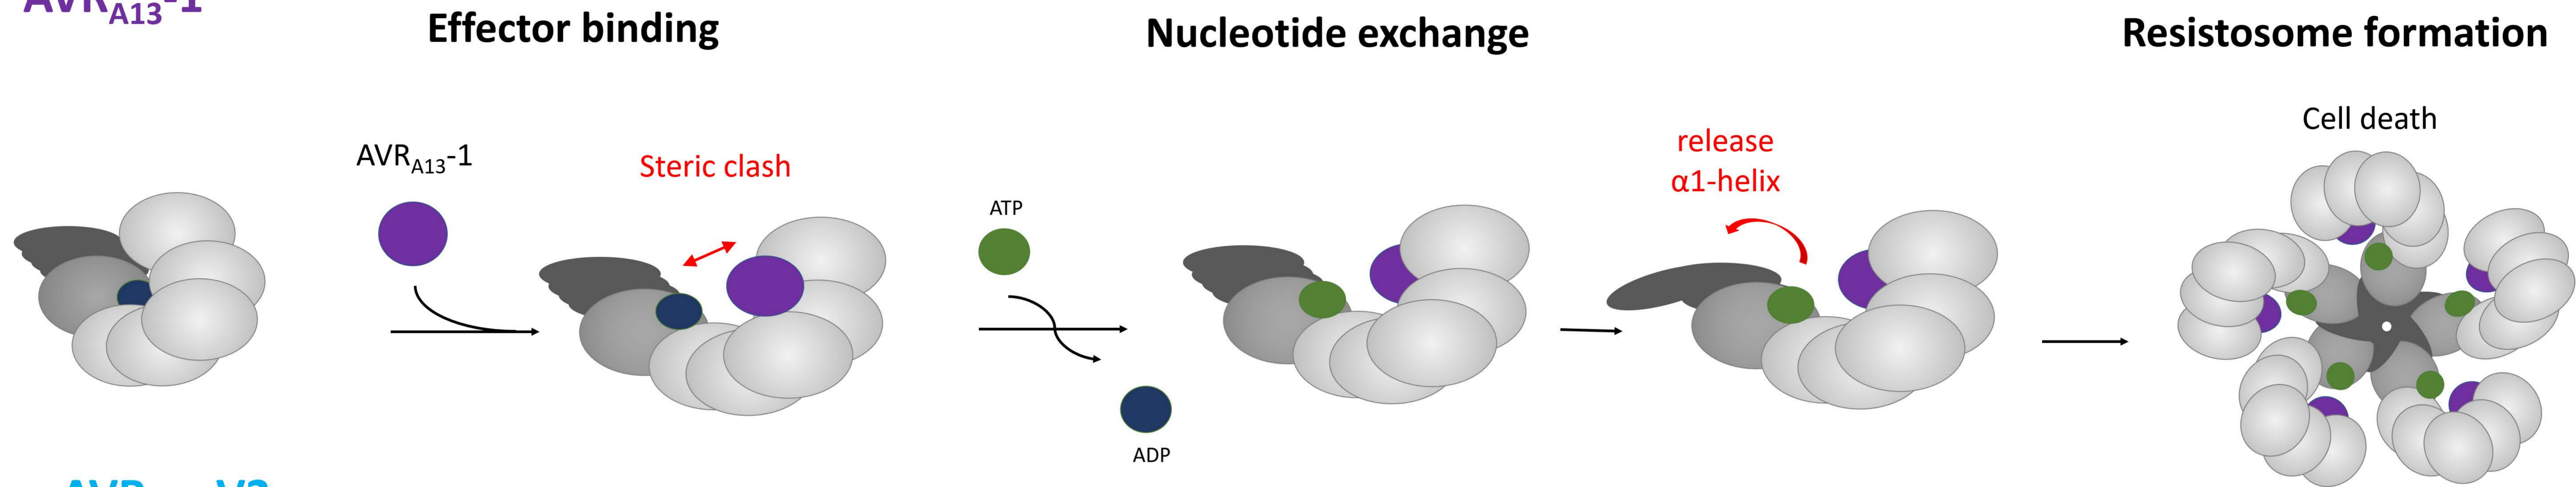

## B $AVR_{A13-V2}$

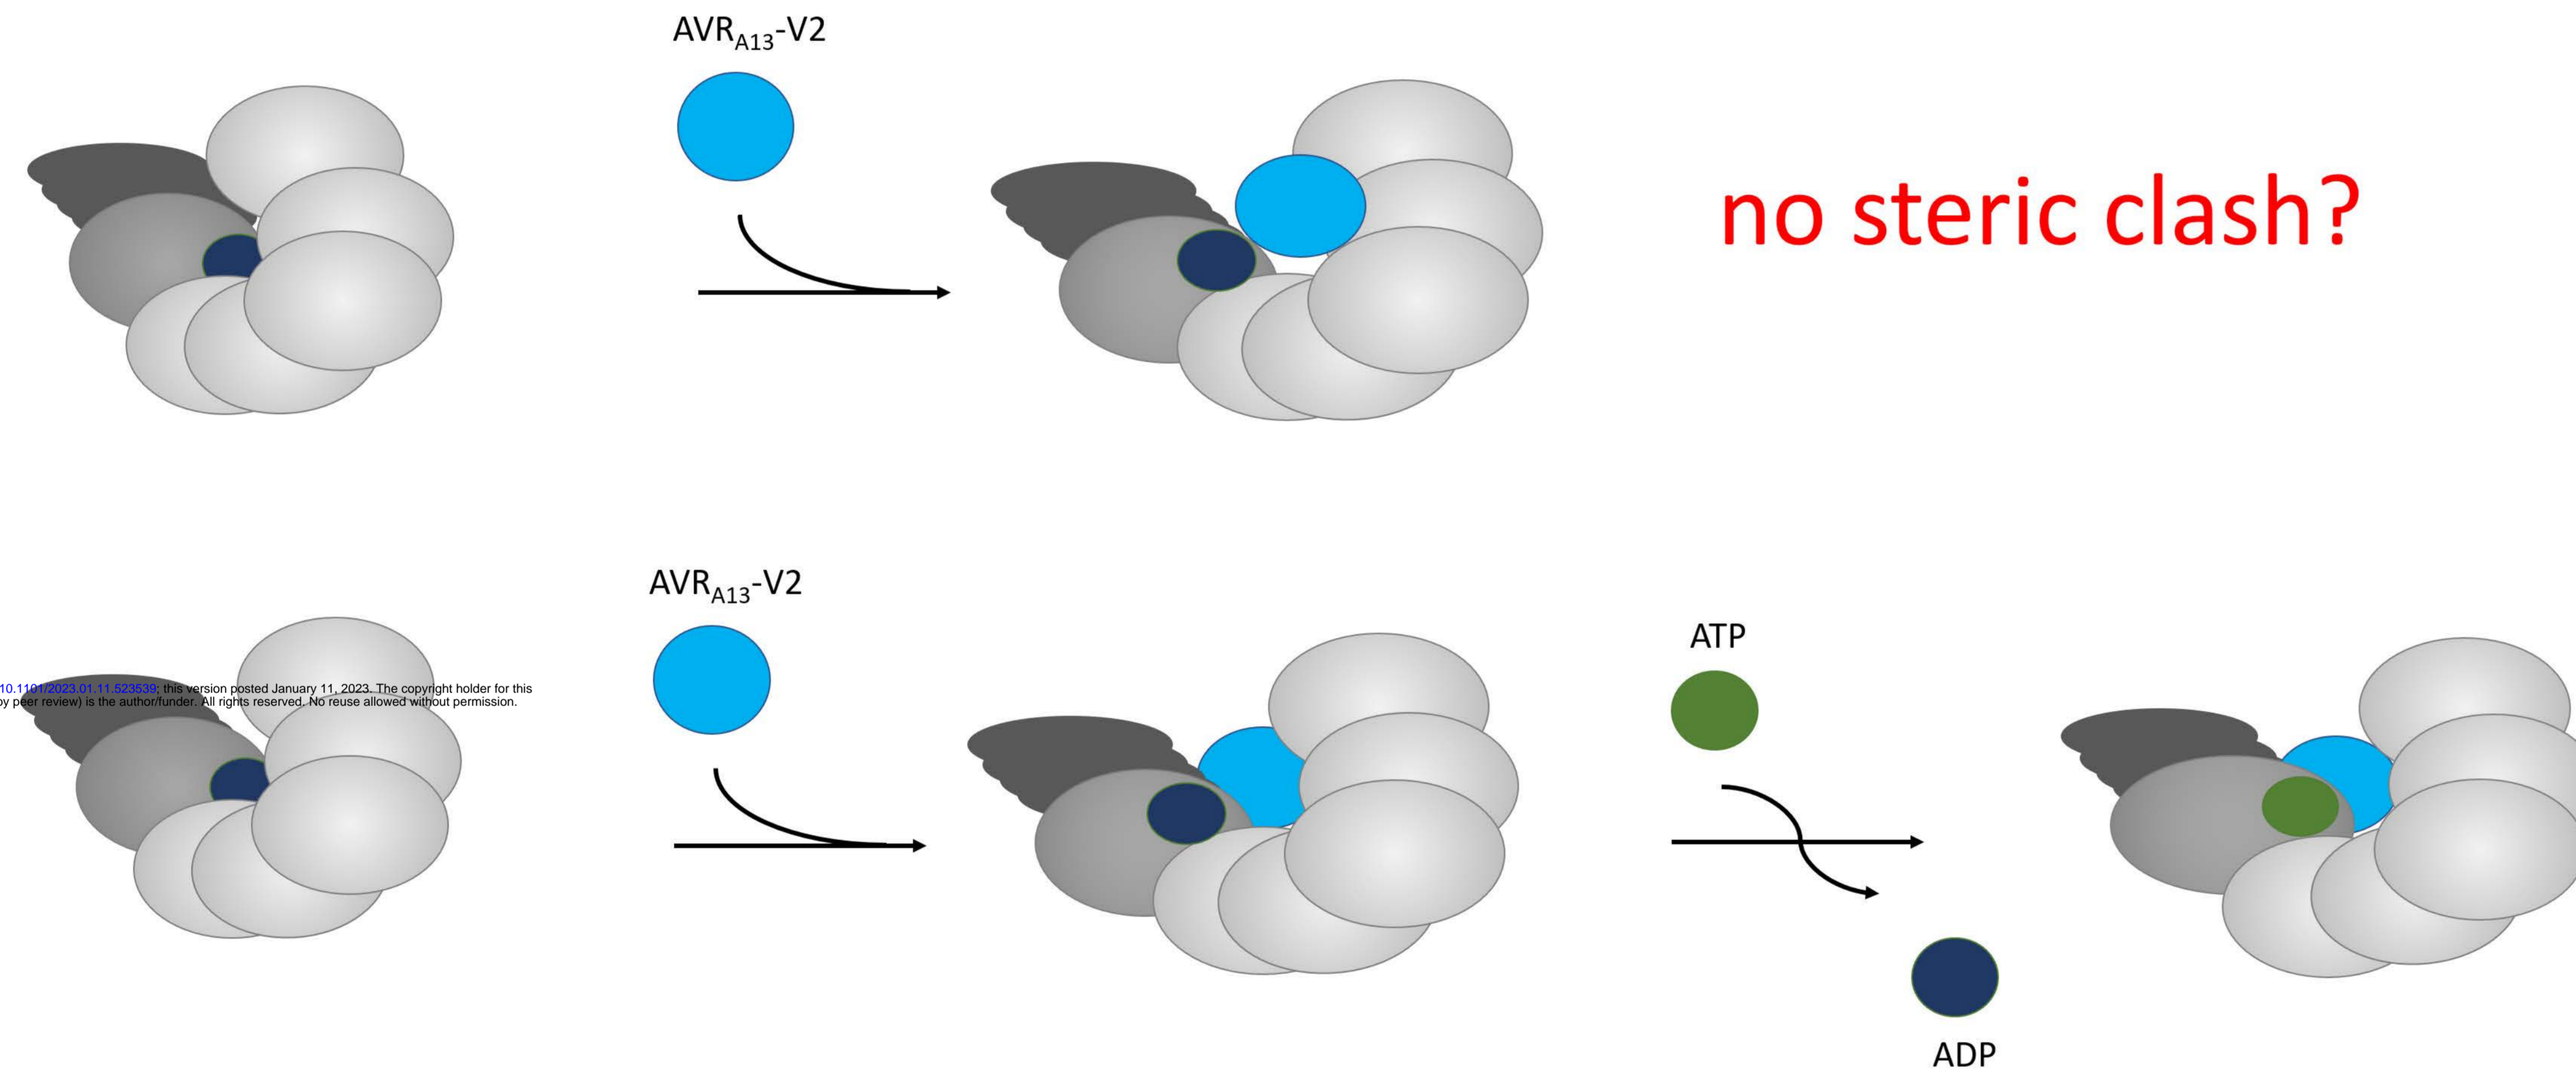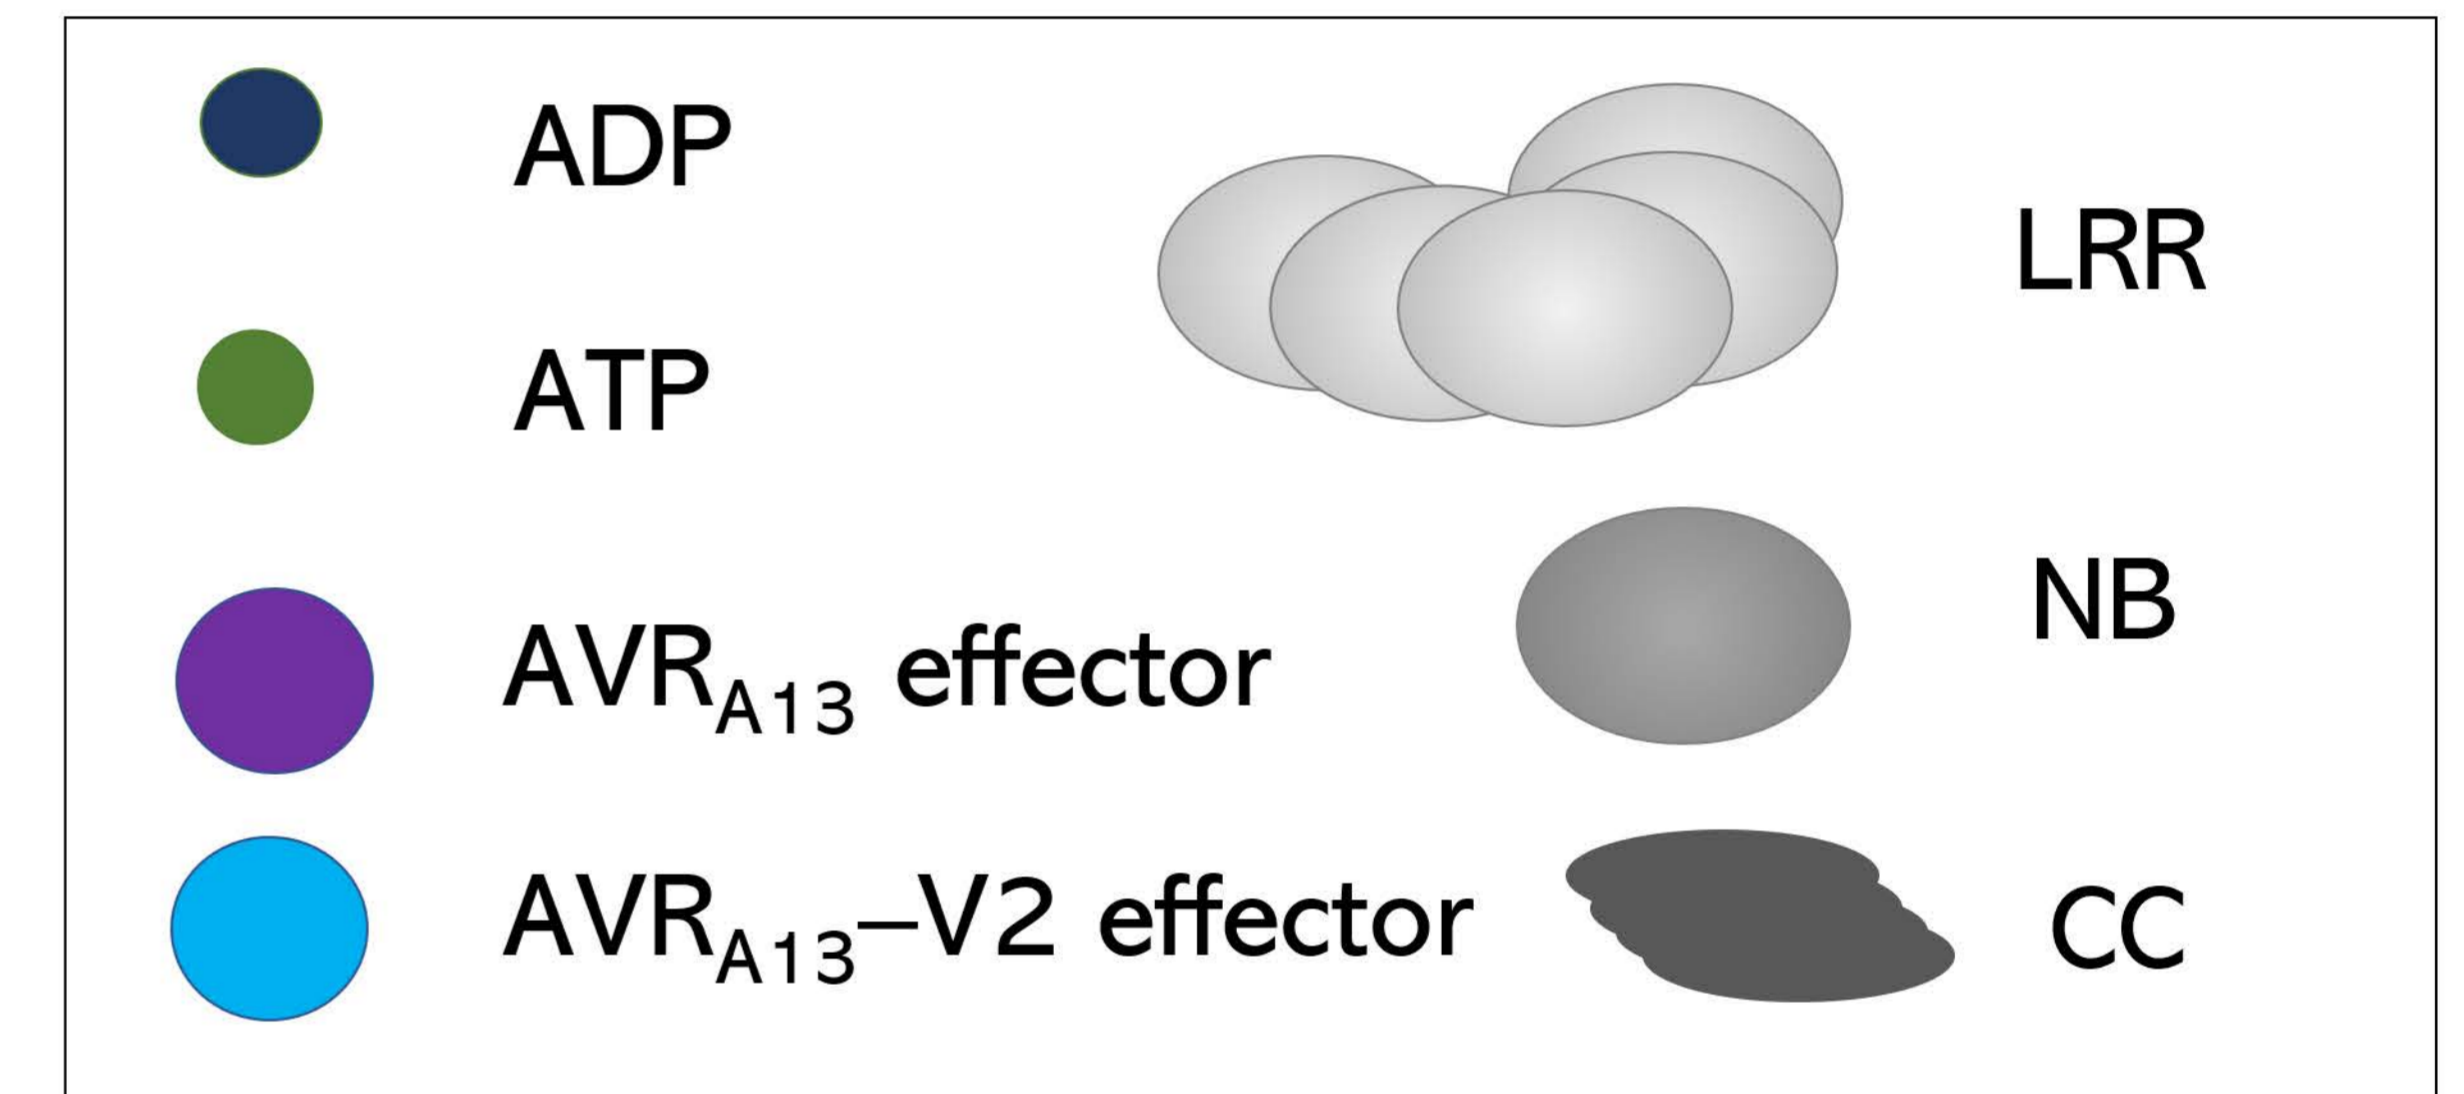

bioRxiv preprint doi: <https://doi.org/10.1101/2022.01.11.468001>; this version posted January 11, 2023. The copyright holder for this preprint (which was not certified by peer review) is the author/funder. All rights reserved. No reuse allowed without permission.

**Fig. S5:** Schematic models of MLA13 during the multistep process of putative resistosome formation initiated by the interaction with *Bgh* AVR<sub>A13-1</sub> (A) and putative models for the inhibition of the activation process by AVR<sub>A13-V2</sub> (B). (A) AVR<sub>A13-1</sub> binding to the effector entry point involving the MLA13 Leucine-rich-repeats (LRR) domain leads to a steric clash and subsequent replacement of adenosine diphosphate (ADP) by adenosine triphosphate (ATP) in the nucleotide-binding (NB) pocket of the MLA13. ATP-binding causes additional structural rearrangement of the N-terminal Coiled-coil (CC) domain releasing the α1-helix. In the resulting putative pentameric wheel-like MLA13 resistosome, the α1-helices are thought to form a funnel-like structure. (B) AVR<sub>A13-V2</sub> binding is likely either incapable of inducing a steric clash or prevents subsequent release of the α1-helix.
